# Supplementary material for: Modelled estimates of spatial variability of iron stress in the Atlantic sector of the Southern Ocean
Source: Copernicus journal article supplement (doi:10.5194/bg-14-3883-2017), 2017-09-01
Supplement: Supplementary file 1 [file bg-14-3883-2017-supplement.zip]

Archive with 3 entries (3 files):
- bg-14-3883-2017-supplement-title-page.pdf
- bg-2017-74_supplementary_data.xlsx
- bg-2017-74-supplement-version5.pdf
