# Supplementary material for: Modelled estimates of spatial variability of iron stress in the Atlantic sector of the Southern Ocean
Source: Copernicus journal article supplement (doi:10.5194/bg-14-3883-2017), 2017-09-01
Supplement: Supplementary file 1 [file bg-14-3883-2017-supplement.zip › bg-14-3883-2017-supplement-title-page.pdf]

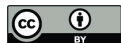

## *Supplement of*

# **Modelled estimates of spatial variability of iron stress in the Atlantic sector of the Southern Ocean**

**Thomas J. Ryan-Keogh et al.**

*Correspondence to:* Thomas J. Ryan-Keogh ([thomas.ryan-keogh@uct.ac.za](mailto:thomas.ryan-keogh@uct.ac.za))

- [bg-14-3883-2017-supplement-title-page.pdf](#)
- [bg-2017-74-supplement-version5.pdf](#)
- [bg-2017-74\\_supplementary\\_data.xlsx](#)

The copyright of individual parts of the supplement might differ from the CC BY 3.0 License.
