# Supplementary material for: Modelled estimates of spatial variability of iron stress in the Atlantic sector of the Southern Ocean
Source: Copernicus journal article supplement (doi:10.5194/bg-14-3883-2017), 2017-09-01
Supplement: Supplementary file 1 [file bg-2017-74_supplementary_data.xlsx]

## Sheet: Metadata
Variable	Units
Light level	μE m-2 s-1
Pb	μM C (μg L Chl)-1 hr-1
chl_conc	μg L-1
PAR	μE m-2 s-1
day_length	hours
*NaN	Not available

## Sheet: Pb
Light level		Experiment 1		Experiment 2		Experiment 3		Experiment 4		Experiment 5		Experiment 6
	Treatment	Fe	Control	Fe	Control	Fe	Control	Fe	Control	Fe	Control	Fe	Control
0		0.00683665	0.00661122	0.00163272	0.00221877	0.00571017	0.00112932	0.000775777	0.000795491	0.00122774	0.00118069	0.000807451	0.000583193
4.37		0.00271569	0.0106504	0.00452302	0.00456419	0.00316324	0.00352595	0.00277055	0.00266101	0.00379008	0.00401156	0.00146891	0.0017151
22.6		0.0204294	0.015807	0.021214	0.0240339	0.0210649	0.0215496	0.019042	0.0167153	0.0188519	0.0188975	0.00689486	0.00946722
39.32		0.0541706	0.0697269	0.0694877	0.0625551	0.047171	0.0492662	0.0405681	0.0381254	0.0418157	0.0443765	0.0147606	0.0123668
44.21		0.0508118	0.0866221	0.0644317	0.0794284	0.0441604	0.0466788	0.0499362	0.0339146	0.0440956	0.0337589	0.0145611	0.0122728
74.34		0.0998586	0.0766693	0.0773926	0.0638679	0.0500974	0.0605005	0.0542372	0.0486691	0.045175	0.0111218	0.0252296	0.0164036
129.45		0.0819265	0.104064	0.0922204	0.0869141	0.0675193	0.0680936	0.0567611	0.0457754	0.0478816	0.020905	0.0284526	0.023743
133.61		0.106881	0.082667	0.0956502	0.0861358	0.053249	0.0764972	0.0569285	0.0524185	0.0556889	0.0150184	0.0224855	0.0252274
166.52		0.124578	0.0875511	0.0774976	0.0982583	0.090336	0.111466	0.0627419	0.0648271	0.0677752	0.0406561	0.0237855	0.0253582
338.19		0.0721523	0.0738703	0.098416	0.0908066	0.0926535	0.0916431	0.0702088	0.0701154	0.0643168	0.0536499	0.0296547	0.0239127
407.97		0.061717	0.0696405	0.090393	0.082631	0.0785599	0.0662146	0.0554606	0.0679579	0.059511	0.0657321	0.0278064	0.0258545

## Sheet: uw_chl
year	month	day	hour	minute	second	lat	lon	chl_conc
2015	12	5	9	59	0	-34.4992	17.2062	0.613989
2015	12	5	13	57	0	-34.485	16.1802	0.327631
2015	12	5	17	57	0	-34.4999	15.2342	0.505592
2015	12	5	18	57	0	-34.4998	14.9558	0.492433
2015	12	5	18	59	0	-34.4998	14.9471	0.47241
2015	12	5	19	1	0	-34.4998	14.9387	0.461286
2015	12	5	19	3	0	-34.4998	14.9301	0.442004
2015	12	5	19	7	0	-34.4998	14.9125	0.413082
2015	12	5	19	8	0	-34.4998	14.9091	0.403441
2015	12	5	19	10	0	-34.4998	14.8966	0.396025
2015	12	5	19	11	0	-34.4998	14.8932	0.390834
2015	12	5	19	12	0	-34.4998	14.8897	0.395284
2015	12	5	19	15	0	-34.4999	14.8739	0.371553
2015	12	5	19	16	0	-34.4999	14.8723	0.381935
2015	12	5	19	17	0	-34.4999	14.869	0.363395
2015	12	5	19	19	0	-34.4999	14.8567	0.366361
2015	12	5	19	20	0	-34.4999	14.8534	0.298135
2015	12	5	19	21	0	-34.4999	14.8502	0.301843
2015	12	5	19	23	0	-34.4999	14.838	0.312967
2015	12	5	19	24	0	-34.4999	14.8347	0.318158
2015	12	5	19	25	0	-34.4999	14.8315	0.346338
2015	12	5	19	26	0	-34.4999	14.8283	0.364878
2015	12	5	19	28	0	-34.5	14.8161	0.36117
2015	12	5	19	29	0	-34.4999	14.8128	0.378227
2015	12	5	19	30	0	-34.4999	14.8096	0.380452
2015	12	5	19	32	0	-34.4999	14.7972	0.376744
2015	12	5	19	33	0	-34.4999	14.7939	0.376002
2015	12	5	19	34	0	-34.4999	14.7906	0.394542
2015	12	5	19	36	0	-34.4999	14.7798	0.391576
2015	12	5	19	37	0	-34.4999	14.7765	0.401216
2015	12	5	19	38	0	-34.4999	14.7733	0.410116
2015	12	5	19	40	0	-34.4999	14.7607	0.408632
2015	12	5	19	41	0	-34.4999	14.7575	0.4027
2015	12	5	19	42	0	-34.4999	14.7543	0.387868
2015	12	5	19	44	0	-34.4999	14.7509	0.392317
2015	12	5	19	45	0	-34.4998	14.7387	0.381193
2015	12	5	19	46	0	-34.4998	14.7356	0.363395
2015	12	5	19	47	0	-34.4998	14.7324	0.36562
2015	12	5	19	49	0	-34.4991	14.7206	0.355237
2015	12	5	19	50	0	-34.4989	14.7176	0.353013
2015	12	5	19	51	0	-34.4987	14.7148	0.345597
2015	12	5	19	53	0	-34.4986	14.7119	0.335956
2015	12	5	19	54	0	-34.4978	14.7004	0.335214
2015	12	5	19	55	0	-34.4975	14.6972	0.323349
2015	12	5	19	57	0	-34.4968	14.6874	0.327057
2015	12	5	19	58	0	-34.4965	14.6846	0.312967
2015	12	5	19	59	0	-34.4963	14.6821	0.312225
2015	12	5	20	1	0	-34.4965	14.6752	0.301843
2015	12	5	20	2	0	-34.4967	14.6736	0.310742
2015	12	5	20	3	0	-34.4968	14.672	0.296651
2015	12	5	20	4	0	-34.4968	14.6702	0.303326
2015	12	5	20	6	0	-34.4965	14.6627	0.31
2015	12	5	20	7	0	-34.4966	14.6605	0.307034
2015	12	5	20	8	0	-34.4965	14.6583	0.332248
2015	12	5	20	10	0	-34.4958	14.6513	0.325574
2015	12	5	20	11	0	-34.4958	14.6494	0.315191
2015	12	5	20	12	0	-34.496	14.6477	0.316674
2015	12	5	20	13	0	-34.4963	14.6465	0.315191
2015	12	5	20	15	0	-34.4964	14.6423	0.317416
2015	12	5	20	16	0	-34.4962	14.6418	0.320382
2015	12	5	20	18	0	-34.4959	14.6396	0.315933
2015	12	5	20	19	0	-34.4958	14.6394	0.318158
2015	12	5	20	20	0	-34.4957	14.6392	0.321124
2015	12	5	20	21	0	-34.4956	14.639	0.315933
2015	12	5	20	23	0	-34.4951	14.639	0.318158
2015	12	5	20	24	0	-34.4951	14.6391	0.308517
2015	12	5	20	25	0	-34.4953	14.6393	0.307034
2015	12	5	20	27	0	-34.4969	14.6401	0.29591
2015	12	5	20	28	0	-34.4974	14.6399	0.301101
2015	12	5	20	29	0	-34.4978	14.6398	0.293685
2015	12	5	20	30	0	-34.4982	14.6396	0.299618
2015	12	5	20	32	0	-34.4987	14.6391	0.298135
2015	12	5	20	33	0	-34.4988	14.6389	0.301101
2015	12	5	20	34	0	-34.4991	14.6387	0.302584
2015	12	5	20	36	0	-34.4997	14.6382	0.294427
2015	12	5	20	37	0	-34.4997	14.6382	0.29146
2015	12	5	20	39	0	-34.4998	14.6385	0.293685
2015	12	5	20	40	0	-34.4998	14.6387	0.29591
2015	12	5	20	41	0	-34.4998	14.6388	0.300359
2015	12	5	20	42	0	-34.4999	14.6389	0.29591
2015	12	5	20	44	0	-34.4999	14.6392	0.304067
2015	12	5	20	45	0	-34.4999	14.6392	0.308517
2015	12	5	20	46	0	-34.4999	14.6392	0.298876
2015	12	5	20	48	0	-34.4999	14.6392	0.309259
2015	12	5	20	49	0	-34.4999	14.6391	0.31
2015	12	5	20	50	0	-34.4999	14.6391	0.320382
2015	12	5	20	51	0	-34.4999	14.6392	0.313708
2015	12	5	20	53	0	-34.4999	14.6392	0.311483
2015	12	5	20	54	0	-34.4999	14.6392	0.325574
2015	12	5	20	55	0	-34.4999	14.6392	0.326315
2015	12	5	20	57	0	-34.4999	14.6391	0.321866
2015	12	5	20	58	0	-34.4999	14.6392	0.31445
2015	12	5	20	59	0	-34.4999	14.6392	0.32854
2015	12	5	21	1	0	-34.4999	14.6391	0.330765
2015	12	5	21	2	0	-34.4999	14.6392	0.315191
2015	12	5	21	3	0	-34.4999	14.6392	0.320382
2015	12	5	21	5	0	-34.4999	14.6392	0.321124
2015	12	5	21	6	0	-34.4999	14.6392	0.323349
2015	12	5	21	7	0	-34.4999	14.6391	0.331506
2015	12	5	21	8	0	-34.4999	14.6391	0.327057
2015	12	5	21	10	0	-34.4999	14.6392	0.307034
2015	12	5	21	11	0	-34.4999	14.6392	0.317416
2015	12	5	21	12	0	-34.4999	14.6392	0.309259
2015	12	5	21	14	0	-34.4999	14.6392	0.310742
2015	12	5	21	15	0	-34.4999	14.6392	0.319641
2015	12	5	21	16	0	-34.4999	14.6392	0.317416
2015	12	5	21	18	0	-34.4999	14.6392	0.321124
2015	12	5	21	19	0	-34.4999	14.6392	0.31445
2015	12	5	21	20	0	-34.4999	14.6392	0.31
2015	12	5	21	22	0	-34.4999	14.6392	0.316674
2015	12	5	21	23	0	-34.4999	14.6392	0.310742
2015	12	5	21	24	0	-34.4999	14.6392	0.320382
2015	12	5	21	26	0	-34.4999	14.6392	0.317416
2015	12	5	21	28	0	-34.4999	14.6392	0.319641
2015	12	5	21	30	0	-34.4999	14.6392	0.319641
2015	12	5	21	33	0	-34.4999	14.6392	0.288494
2015	12	5	21	37	0	-34.4999	14.6392	0.243256
2015	12	5	21	38	0	-34.4999	14.6392	0.235099
2015	12	5	21	39	0	-34.4999	14.6392	0.238065
2015	12	5	21	41	0	-34.4999	14.6392	0.246223
2015	12	5	21	42	0	-34.4999	14.6392	0.243256
2015	12	5	21	44	0	-34.4999	14.6392	0.241032
2015	12	5	21	46	0	-34.4999	14.6392	0.246964
2015	12	5	21	47	0	-34.4999	14.6392	0.246223
2015	12	5	21	48	0	-34.4999	14.6392	0.234357
2015	12	5	21	50	0	-34.4999	14.6392	0.233616
2015	12	5	21	51	0	-34.4999	14.6392	0.234357
2015	12	5	21	52	0	-34.5	14.6392	0.232133
2015	12	5	21	53	0	-34.5	14.6392	0.241773
2015	12	5	21	55	0	-34.4999	14.6392	0.235841
2015	12	5	21	56	0	-34.4999	14.6392	0.246223
2015	12	5	21	58	0	-34.4999	14.6391	0.24029
2015	12	5	21	59	0	-34.4999	14.6391	0.24474
2015	12	5	22	0	0	-34.4999	14.6392	0.24474
2015	12	5	22	2	0	-34.4999	14.6392	0.241032
2015	12	5	22	3	0	-34.4999	14.6392	0.252156
2015	12	5	22	4	0	-34.4999	14.6392	0.252897
2015	12	5	22	5	0	-34.4999	14.6392	0.243998
2015	12	5	22	7	0	-34.4999	14.6392	0.258088
2015	12	5	22	8	0	-34.4999	14.6392	0.249189
2015	12	5	22	9	0	-34.4999	14.6392	0.252156
2015	12	5	22	11	0	-34.5	14.6392	0.250672
2015	12	5	22	12	0	-34.5	14.6392	0.253639
2015	12	5	22	13	0	-34.4999	14.6392	0.259572
2015	12	5	22	14	0	-34.4999	14.6392	0.261055
2015	12	5	22	16	0	-34.4999	14.6392	0.257347
2015	12	5	22	17	0	-34.4999	14.6392	0.251414
2015	12	5	22	19	0	-34.4999	14.6392	0.251414
2015	12	5	22	20	0	-34.4999	14.6392	0.250672
2015	12	5	22	21	0	-34.4999	14.6392	0.252897
2015	12	5	22	22	0	-34.4999	14.6392	0.249931
2015	12	5	22	24	0	-34.4999	14.6392	0.252156
2015	12	5	22	25	0	-34.4999	14.6392	0.246964
2015	12	5	22	26	0	-34.4999	14.6392	0.252156
2015	12	5	22	28	0	-34.4999	14.6392	0.243256
2015	12	5	22	29	0	-34.4999	14.6392	0.24029
2015	12	5	22	30	0	-34.4999	14.6392	0.24029
2015	12	5	22	31	0	-34.4999	14.6392	0.241032
2015	12	5	22	33	0	-34.4999	14.6392	0.249931
2015	12	5	22	34	0	-34.4999	14.6392	0.252897
2015	12	5	22	35	0	-34.4999	14.6392	0.255122
2015	12	5	22	37	0	-34.4999	14.6392	0.257347
2015	12	5	22	38	0	-34.4999	14.6392	0.259572
2015	12	5	22	39	0	-34.4999	14.6392	0.256605
2015	12	5	22	41	0	-34.4999	14.6392	0.264763
2015	12	5	22	42	0	-34.4999	14.6392	0.257347
2015	12	5	22	43	0	-34.4999	14.6392	0.261796
2015	12	5	22	46	0	-34.4999	14.6392	0.253639
2015	12	5	22	47	0	-34.4999	14.6392	0.246964
2015	12	5	22	48	0	-34.4999	14.6392	0.257347
2015	12	5	22	50	0	-34.4999	14.6392	0.250672
2015	12	5	22	51	0	-34.4999	14.6392	0.256605
2015	12	5	22	52	0	-34.4999	14.6392	0.261055
2015	12	5	22	54	0	-34.4999	14.6392	0.264021
2015	12	5	22	55	0	-34.4999	14.6392	0.262538
2015	12	5	22	56	0	-34.4999	14.6392	0.268471
2015	12	5	22	57	0	-34.4999	14.6392	0.264763
2015	12	5	22	59	0	-34.4999	14.6392	0.260313
2015	12	5	23	0	0	-34.4999	14.6392	0.256605
2015	12	5	23	2	0	-34.4999	14.6392	0.259572
2015	12	5	23	3	0	-34.4999	14.6392	0.26328
2015	12	5	23	4	0	-34.4999	14.6392	0.264763
2015	12	5	23	6	0	-34.4999	14.6392	0.264763
2015	12	5	23	7	0	-34.4999	14.6391	0.264021
2015	12	5	23	8	0	-34.5	14.6391	0.256605
2015	12	5	23	9	0	-34.5	14.6392	0.259572
2015	12	5	23	11	0	-34.4999	14.6392	0.256605
2015	12	5	23	12	0	-34.5	14.6391	0.252897
2015	12	5	23	13	0	-34.5	14.6391	0.257347
2015	12	5	23	15	0	-34.5	14.6392	0.256605
2015	12	5	23	16	0	-34.5	14.6392	0.241773
2015	12	5	23	17	0	-34.5	14.6392	0.25438
2015	12	5	23	19	0	-34.4999	14.6392	0.238065
2015	12	5	23	20	0	-34.4999	14.6392	0.25438
2015	12	5	23	21	0	-34.4999	14.6392	0.252156
2015	12	5	23	23	0	-34.4999	14.6391	0.257347
2015	12	5	23	24	0	-34.4999	14.6392	0.25438
2015	12	5	23	25	0	-34.4999	14.6392	0.259572
2015	12	5	23	26	0	-34.4999	14.6391	0.248448
2015	12	5	23	28	0	-34.4999	14.6392	0.251414
2015	12	5	23	29	0	-34.4999	14.6392	0.246223
2015	12	5	23	30	0	-34.4999	14.6392	0.257347
2015	12	5	23	32	0	-34.4999	14.6392	0.25883
2015	12	5	23	33	0	-34.4999	14.6392	0.249931
2015	12	5	23	34	0	-34.4999	14.6392	0.243256
2015	12	5	23	35	0	-34.4999	14.6392	0.241032
2015	12	5	23	37	0	-34.4999	14.6392	0.232874
2015	12	5	23	38	0	-34.4999	14.6392	0.234357
2015	12	5	23	40	0	-34.4999	14.6392	0.246223
2015	12	5	23	41	0	-34.4999	14.6392	0.243998
2015	12	5	23	42	0	-34.4999	14.6392	0.239548
2015	12	5	23	43	0	-34.4999	14.6392	0.252156
2015	12	5	23	45	0	-34.4999	14.6392	0.238807
2015	12	5	23	46	0	-34.4999	14.6391	0.242515
2015	12	5	23	47	0	-34.4999	14.6391	0.243998
2015	12	5	23	49	0	-34.4999	14.6392	0.239548
2015	12	5	23	50	0	-34.4999	14.6392	0.229908
2015	12	5	23	51	0	-34.4999	14.6391	0.232133
2015	12	5	23	52	0	-34.4999	14.6391	0.247706
2015	12	5	23	54	0	-34.4999	14.6391	0.243256
2015	12	5	23	56	0	-34.4999	14.6391	0.250672
2015	12	5	23	58	0	-34.4999	14.6392	0.232874
2015	12	6	0	0	0	-34.4999	14.6391	0.229166
2015	12	6	0	2	0	-34.4999	14.6391	0.238065
2015	12	6	0	6	0	-34.4999	14.6391	0.232874
2015	12	6	0	8	0	-34.4999	14.6391	0.231391
2015	12	6	0	9	0	-34.4999	14.6391	0.233616
2015	12	6	0	10	0	-34.4999	14.6391	0.229908
2015	12	6	0	11	0	-34.4999	14.6391	0.233616
2015	12	6	0	14	0	-34.4999	14.6391	0.2262
2015	12	6	0	15	0	-34.4999	14.6391	0.226941
2015	12	6	0	17	0	-34.4999	14.6391	0.224717
2015	12	6	0	18	0	-34.4999	14.6391	0.228425
2015	12	6	0	19	0	-34.4999	14.6392	0.221009
2015	12	6	0	21	0	-34.4999	14.6392	0.217301
2015	12	6	0	22	0	-34.4999	14.6392	0.212851
2015	12	6	0	23	0	-34.4999	14.6391	0.210626
2015	12	6	0	25	0	-34.4999	14.6392	0.208401
2015	12	6	0	26	0	-34.4999	14.6392	0.214334
2015	12	6	0	27	0	-34.4999	14.6392	0.212109
2015	12	6	0	28	0	-34.4999	14.6392	0.203952
2015	12	6	0	30	0	-34.4999	14.6391	0.210626
2015	12	6	0	31	0	-34.4999	14.6391	0.220267
2015	12	6	0	32	0	-34.4999	14.6392	0.206177
2015	12	6	0	34	0	-34.4999	14.6392	0.209885
2015	12	6	0	35	0	-34.4999	14.6392	0.219525
2015	12	6	0	36	0	-34.4999	14.6392	0.214334
2015	12	6	0	37	0	-34.4999	14.6392	0.212109
2015	12	6	0	39	0	-34.4999	14.6392	0.212851
2015	12	6	0	40	0	-34.4999	14.6392	0.218784
2015	12	6	0	42	0	-34.4999	14.6392	0.213593
2015	12	6	0	43	0	-34.5	14.6391	0.215076
2015	12	6	0	44	0	-34.5001	14.6389	0.208401
2015	12	6	0	45	0	-34.5002	14.6387	0.204693
2015	12	6	0	47	0	-34.5018	14.6372	0.212109
2015	12	6	0	48	0	-34.5026	14.6368	0.199502
2015	12	6	0	49	0	-34.5037	14.6365	0.186895
2015	12	6	0	51	0	-34.5095	14.6341	0.185412
2015	12	6	0	52	0	-34.5111	14.6328	0.18912
2015	12	6	0	53	0	-34.5128	14.6314	0.200986
2015	12	6	0	54	0	-34.5145	14.6299	0.192828
2015	12	6	0	56	0	-34.521	14.6226	0.200986
2015	12	6	0	57	0	-34.5231	14.6211	0.192086
2015	12	6	0	58	0	-34.5253	14.6195	0.190603
2015	12	6	1	0	0	-34.5325	14.6139	0.189862
2015	12	6	1	1	0	-34.5347	14.6122	0.186154
2015	12	6	1	3	0	-34.5432	14.6059	0.186895
2015	12	6	1	4	0	-34.5454	14.6042	0.181704
2015	12	6	1	5	0	-34.5476	14.6025	0.183187
2015	12	6	1	6	0	-34.5497	14.6008	0.179479
2015	12	6	1	8	0	-34.558	14.5944	0.177996
2015	12	6	1	9	0	-34.5602	14.5927	0.176513
2015	12	6	1	10	0	-34.5625	14.591	0.182446
2015	12	6	1	12	0	-34.5708	14.5846	0.181704
2015	12	6	1	13	0	-34.573	14.5828	0.175771
2015	12	6	1	14	0	-34.5752	14.5811	0.174288
2015	12	6	1	15	0	-34.5775	14.5794	0.172063
2015	12	6	1	17	0	-34.5859	14.5729	0.172063
2015	12	6	1	18	0	-34.5881	14.5712	0.161681
2015	12	6	1	19	0	-34.5904	14.5695	0.160939
2015	12	6	1	21	0	-34.5977	14.5638	0.153523
2015	12	6	1	22	0	-34.6	14.5621	0.157231
2015	12	6	1	23	0	-34.6022	14.5604	0.150557
2015	12	6	1	25	0	-34.6108	14.5537	0.157231
2015	12	6	1	26	0	-34.6131	14.552	0.149074
2015	12	6	1	27	0	-34.6153	14.5503	0.149815
2015	12	6	1	29	0	-34.6238	14.5437	0.148332
2015	12	6	1	30	0	-34.6261	14.5419	0.155007
2015	12	6	1	31	0	-34.6284	14.5402	0.148332
2015	12	6	1	32	0	-34.6306	14.5384	0.137208
2015	12	6	1	34	0	-34.6393	14.5318	0.141658
2015	12	6	1	35	0	-34.6416	14.53	0.12386
2015	12	6	1	36	0	-34.6438	14.5283	0.126084
2015	12	6	1	38	0	-34.6524	14.5216	0.123118
2015	12	6	1	39	0	-34.6546	14.5199	0.116444
2015	12	6	1	41	0	-34.6558	14.519	0.106803
2015	12	6	1	42	0	-34.6644	14.5123	0.106803
2015	12	6	1	43	0	-34.6667	14.5106	0.101612
2015	12	6	1	44	0	-34.6689	14.5089	0.0941957
2015	12	6	1	46	0	-34.6774	14.5022	0.101612
2015	12	6	1	47	0	-34.6797	14.5005	0.0927125
2015	12	6	1	48	0	-34.682	14.4988	0.0890045
2015	12	6	1	50	0	-34.6842	14.4971	0.0882629
2015	12	6	1	51	0	-34.6927	14.4905	0.0793638
2015	12	6	1	52	0	-34.6949	14.4888	0.0756558
2015	12	6	1	53	0	-34.6971	14.4871	0.0838133
2015	12	6	1	55	0	-34.7056	14.4806	0.0778806
2015	12	6	1	56	0	-34.7078	14.4789	0.077139
2015	12	6	1	57	0	-34.7101	14.4772	0.0741726
2015	12	6	1	59	0	-34.7184	14.4707	0.0712062
2015	12	6	2	0	0	-34.7206	14.4691	0.0726894
2015	12	6	2	1	0	-34.7217	14.4682	0.0756558
2015	12	6	2	3	0	-34.7302	14.4617	0.0674982
2015	12	6	2	4	0	-34.7324	14.4599	0.0749142
2015	12	6	2	5	0	-34.7346	14.4582	0.0778806
2015	12	6	2	7	0	-34.7429	14.4518	0.0645318
2015	12	6	2	8	0	-34.7451	14.4501	0.0756558
2015	12	6	2	9	0	-34.7473	14.4484	0.0712062
2015	12	6	2	10	0	-34.7496	14.4467	0.0756558
2015	12	6	2	12	0	-34.7581	14.4402	0.0756558
2015	12	6	2	13	0	-34.7604	14.4384	0.0845549
2015	12	6	2	14	0	-34.7626	14.4367	0.0726894
2015	12	6	2	16	0	-34.7711	14.4301	0.0585991
2015	12	6	2	17	0	-34.7734	14.4284	0.073431
2015	12	6	2	18	0	-34.7756	14.4267	0.0741726
2015	12	6	2	19	0	-34.7779	14.425	0.0763974
2015	12	6	2	21	0	-34.7853	14.4192	0.0726894
2015	12	6	2	22	0	-34.7876	14.4174	0.0637902
2015	12	6	2	24	0	-34.7961	14.4109	0.0704646
2015	12	6	2	26	0	-34.802	14.4062	0.0430256
2015	12	6	2	28	0	-34.808	14.4017	0.0482167
2015	12	6	2	30	0	-34.814	14.397	0.0741726
2015	12	6	2	32	0	-34.8201	14.3924	0.0667566
2015	12	6	2	34	0	-34.8259	14.3878	0.0571159
2015	12	6	2	36	0	-34.8318	14.3833	0.0578575
2015	12	6	2	38	0	-34.8378	14.3786	0.0511831
2015	12	6	2	40	0	-34.8438	14.374	0.0534079
2015	12	6	2	43	0	-34.855	14.3654	0.0363512
2015	12	6	2	45	0	-34.861	14.3607	0.0408008
2015	12	6	2	49	0	-34.8733	14.3511	0.0319016
2015	12	6	2	50	0	-34.8757	14.3493	0.0281936
2015	12	6	2	51	0	-34.8781	14.3475	0.034868
2015	12	6	2	53	0	-34.8868	14.3408	0.0333848
2015	12	6	2	54	0	-34.8892	14.3389	0.0244857
2015	12	6	2	56	0	-34.8938	14.3354	0.0304184
2015	12	6	2	58	0	-34.9023	14.3288	0.0252273
2015	12	6	2	59	0	-34.9046	14.327	0.0259688
2015	12	6	3	0	0	-34.9069	14.3253	0.0170697
2015	12	6	3	2	0	-34.9143	14.3196	0.0259688
2015	12	6	3	3	0	-34.9166	14.3179	0.0192945
2015	12	6	3	5	0	-34.9188	14.3161	0.0192945
2015	12	6	3	6	0	-34.9274	14.3094	0.0178113
2015	12	6	3	7	0	-34.9297	14.3077	0.0222609
2015	12	6	3	8	0	-34.9319	14.306	0.0259688
2015	12	6	3	10	0	-34.9405	14.2993	0.0281936
2015	12	6	3	11	0	-34.9428	14.2975	0.027452
2015	12	6	3	12	0	-34.9451	14.2958	0.0296768
2015	12	6	3	13	0	-34.9473	14.2941	0.0378344
2015	12	6	3	15	0	-34.9558	14.2874	0.0259688
2015	12	6	3	16	0	-34.9581	14.2856	0.0267104
2015	12	6	3	17	0	-34.9604	14.2838	0.0259688
2015	12	6	3	19	0	-34.9691	14.2772	0.034868
2015	12	6	3	20	0	-34.9714	14.2754	0.0215193
2015	12	6	3	22	0	-34.9789	14.2696	0.0185529
2015	12	6	3	23	0	-34.9812	14.2679	0.0192945
2015	12	6	3	24	0	-34.9835	14.2661	0.0192945
2015	12	6	3	25	0	-34.9857	14.2644	0.0178113
2015	12	6	3	27	0	-34.9945	14.2575	0.0200361
2015	12	6	3	28	0	-34.9968	14.2558	0.0155865
2015	12	6	3	29	0	-34.9991	14.254	0.0133617
2015	12	6	3	31	0	-35.0077	14.2473	0.0178113
2015	12	6	3	32	0	-35.0101	14.2456	0.0289352
2015	12	6	3	33	0	-35.0124	14.2438	0.0319016
2015	12	6	3	34	0	-35.0146	14.242	0.0400592
2015	12	6	3	36	0	-35.0234	14.2352	0.0363512
2015	12	6	3	37	0	-35.0257	14.2334	0.0333848
2015	12	6	3	38	0	-35.028	14.2316	0.0363512
2015	12	6	3	40	0	-35.0366	14.225	0.038576
2015	12	6	3	41	0	-35.039	14.2232	0.0333848
2015	12	6	3	42	0	-35.0402	14.2223	0.0437672
2015	12	6	3	44	0	-35.0487	14.2155	0.0452503
2015	12	6	3	45	0	-35.051	14.2138	0.0408008
2015	12	6	6	0	0	-35.4944	13.8689	0.335952
2015	12	6	9	59	0	-36.115	13.3837	0.319199
2015	12	6	13	57	0	-36.8817	12.8667	0.298119
2015	12	6	19	14	0	-37.4081	12.5188	0.107544
2015	12	6	19	16	0	-37.4081	12.5188	0.103836
2015	12	6	19	17	0	-37.4081	12.5188	0.11496
2015	12	6	19	19	0	-37.4081	12.5188	0.106061
2015	12	6	19	20	0	-37.4081	12.5188	0.109028
2015	12	6	19	22	0	-37.4081	12.5188	0.111252
2015	12	6	19	23	0	-37.4081	12.5188	0.110511
2015	12	6	19	25	0	-37.4081	12.5188	0.123118
2015	12	6	19	26	0	-37.4081	12.5188	0.110511
2015	12	6	19	28	0	-37.4081	12.5188	0.118668
2015	12	6	19	29	0	-37.4081	12.5188	0.11496
2015	12	6	19	31	0	-37.4081	12.5188	0.126826
2015	12	6	19	32	0	-37.4081	12.5188	0.120893
2015	12	6	19	34	0	-37.4081	12.5188	0.128309
2015	12	6	19	35	0	-37.4081	12.5188	0.127568
2015	12	6	19	37	0	-37.4081	12.5188	0.138691
2015	12	6	19	38	0	-37.4081	12.5188	0.122376
2015	12	6	19	40	0	-37.4081	12.5188	0.129051
2015	12	6	19	41	0	-37.4081	12.5188	0.127568
2015	12	6	19	43	0	-37.4081	12.5188	0.117927
2015	12	6	19	44	0	-37.4081	12.5188	0.12386
2015	12	6	19	46	0	-37.4081	12.5188	0.134242
2015	12	6	19	47	0	-37.4081	12.5188	0.131275
2015	12	6	19	49	0	-37.4081	12.5188	0.130534
2015	12	6	19	50	0	-37.4081	12.5188	0.134983
2015	12	6	19	52	0	-37.4081	12.5188	0.143883
2015	12	6	19	53	0	-37.4081	12.5188	0.145366
2015	12	6	19	55	0	-37.4081	12.5188	0.138691
2015	12	6	19	56	0	-37.4081	12.5188	0.140175
2015	12	6	19	58	0	-37.4081	12.5188	0.146849
2015	12	6	19	59	0	-37.4081	12.5188	0.148332
2015	12	6	20	1	0	-37.4081	12.5188	0.143141
2015	12	6	20	2	0	-37.4081	12.5188	0.141658
2015	12	6	20	4	0	-37.4081	12.5188	0.143883
2015	12	6	20	7	0	-37.4081	12.5188	0.142399
2015	12	6	20	9	0	-37.4081	12.5188	0.140916
2015	12	6	20	12	0	-37.4081	12.5188	0.136467
2015	12	6	20	16	0	-37.4081	12.5188	0.143141
2015	12	6	20	17	0	-37.4081	12.5188	0.132017
2015	12	6	20	19	0	-37.4081	12.5188	0.137208
2015	12	6	20	20	0	-37.4081	12.5188	0.138691
2015	12	6	20	22	0	-37.4081	12.5188	0.143883
2015	12	6	20	24	0	-37.4081	12.5188	0.142399
2015	12	6	20	26	0	-37.4081	12.5188	0.149815
2015	12	6	20	28	0	-37.4081	12.5188	0.150557
2015	12	6	20	29	0	-37.4081	12.5188	0.154265
2015	12	6	20	30	0	-37.4081	12.5188	0.152782
2015	12	6	20	32	0	-37.4081	12.5188	0.146107
2015	12	6	20	33	0	-37.4081	12.5188	0.162423
2015	12	6	20	35	0	-37.4081	12.5188	0.148332
2015	12	6	20	36	0	-37.4081	12.5188	0.146849
2015	12	6	20	38	0	-37.4081	12.5188	0.141658
2015	12	6	20	39	0	-37.4081	12.5188	0.139433
2015	12	6	20	41	0	-37.4081	12.5188	0.144624
2015	12	6	20	42	0	-37.4081	12.5188	0.142399
2015	12	6	20	44	0	-37.4081	12.5188	0.148332
2015	12	6	20	45	0	-37.4081	12.5188	0.143883
2015	12	6	20	47	0	-37.4081	12.5188	0.139433
2015	12	6	20	49	0	-37.4081	12.5188	0.151299
2015	12	6	20	50	0	-37.4081	12.5188	0.154265
2015	12	6	20	51	0	-37.4081	12.5188	0.160198
2015	12	6	20	53	0	-37.4081	12.5188	0.153523
2015	12	6	20	54	0	-37.4081	12.5188	0.161681
2015	12	6	20	56	0	-37.4081	12.5188	0.155007
2015	12	6	20	57	0	-37.4081	12.5188	0.15649
2015	12	6	20	58	0	-37.4081	12.5188	0.167614
2015	12	6	21	0	0	-37.4081	12.5188	0.157973
2015	12	6	21	1	0	-37.4081	12.5188	0.162423
2015	12	6	21	2	0	-37.4081	12.5188	0.158715
2015	12	6	21	4	0	-37.4081	12.5188	0.163164
2015	12	6	21	5	0	-37.4081	12.5188	0.150557
2015	12	6	21	6	0	-37.4081	12.5188	0.0979037
2015	12	6	21	8	0	-37.4081	12.5188	0.154265
2015	12	6	21	9	0	-37.4081	12.5188	0.154265
2015	12	6	21	10	0	-37.4081	12.5188	0.166872
2015	12	6	21	12	0	-37.4081	12.5188	0.155007
2015	12	6	21	13	0	-37.4081	12.5188	0.15649
2015	12	6	21	14	0	-37.4081	12.5188	0.151299
2015	12	6	21	16	0	-37.4081	12.5188	0.168355
2015	12	6	21	17	0	-37.4081	12.5188	0.160939
2015	12	6	21	18	0	-37.4081	12.5188	0.159456
2015	12	6	21	20	0	-37.4081	12.5188	0.159456
2015	12	6	21	21	0	-37.4081	12.5188	0.162423
2015	12	6	21	22	0	-37.4081	12.5188	0.166872
2015	12	6	21	24	0	-37.4081	12.5188	0.153523
2015	12	6	21	25	0	-37.4081	12.5188	0.172063
2015	12	6	21	26	0	-37.4081	12.5188	0.16613
2015	12	6	21	27	0	-37.4081	12.5188	0.155007
2015	12	6	21	29	0	-37.4081	12.5188	0.167614
2015	12	6	21	30	0	-37.4081	12.5188	0.165389
2015	12	6	21	32	0	-37.4081	12.5188	0.15649
2015	12	6	21	33	0	-37.4081	12.5188	0.172063
2015	12	6	21	34	0	-37.4081	12.5188	0.181704
2015	12	6	21	36	0	-37.4081	12.5188	0.17058
2015	12	6	21	37	0	-37.4081	12.5188	0.174288
2015	12	6	21	38	0	-37.4081	12.5188	0.17503
2015	12	6	21	40	0	-37.4081	12.5188	0.165389
2015	12	6	21	41	0	-37.4081	12.5188	0.157231
2015	12	6	21	42	0	-37.4081	12.5188	0.157231
2015	12	6	21	44	0	-37.4081	12.5188	0.160198
2015	12	6	21	45	0	-37.4081	12.5188	0.163906
2015	12	6	21	46	0	-37.4081	12.5188	0.162423
2015	12	6	21	47	0	-37.4081	12.5188	0.177996
2015	12	6	21	49	0	-37.4081	12.5188	0.169097
2015	12	6	21	50	0	-37.4081	12.5188	0.161681
2015	12	6	21	52	0	-37.4081	12.5188	0.155007
2015	12	6	21	53	0	-37.4081	12.5188	0.149815
2015	12	6	21	54	0	-37.4081	12.5188	0.15204
2015	12	6	21	56	0	-37.4081	12.5188	0.147591
2015	12	6	21	57	0	-37.4081	12.5188	0.141658
2015	12	6	21	58	0	-37.4081	12.5188	0.130534
2015	12	6	22	0	0	-37.4081	12.5188	0.143141
2015	12	6	22	1	0	-37.4081	12.5188	0.141658
2015	12	6	22	2	0	-37.4081	12.5188	0.13795
2015	12	6	22	4	0	-37.4081	12.5188	0.140175
2015	12	6	22	5	0	-37.4081	12.5188	0.131275
2015	12	6	22	6	0	-37.4081	12.5188	0.13795
2015	12	6	22	7	0	-37.4081	12.5188	0.140916
2015	12	6	22	9	0	-37.4081	12.5188	0.131275
2015	12	6	22	10	0	-37.4081	12.5188	0.147591
2015	12	6	22	12	0	-37.4081	12.5188	0.138691
2015	12	6	22	13	0	-37.4081	12.5188	0.141658
2015	12	6	22	14	0	-37.4081	12.5188	0.151299
2015	12	6	22	16	0	-37.4081	12.5188	0.140175
2015	12	6	22	17	0	-37.4081	12.5188	0.137208
2015	12	6	22	18	0	-37.4081	12.5188	0.115702
2015	12	6	22	20	0	-37.4081	12.5188	0.12386
2015	12	6	22	21	0	-37.4081	12.5188	0.124601
2015	12	6	22	22	0	-37.4081	12.5188	0.135725
2015	12	6	22	24	0	-37.4081	12.5188	0.128309
2015	12	6	22	25	0	-37.4081	12.5188	0.127568
2015	12	6	22	26	0	-37.4081	12.5188	0.129051
2015	12	6	22	27	0	-37.4081	12.5188	0.126084
2015	12	6	22	29	0	-37.4083	12.5188	0.137208
2015	12	6	22	30	0	-37.4085	12.5188	0.140175
2015	12	6	22	32	0	-37.4098	12.5187	0.135725
2015	12	6	22	33	0	-37.4103	12.5187	0.136467
2015	12	6	22	34	0	-37.4108	12.5186	0.0875213
2015	12	6	22	36	0	-37.4161	12.5153	0.0993869
2015	12	6	22	37	0	-37.418	12.5138	0.0904877
2015	12	6	22	38	0	-37.4199	12.5121	0.0971621
2015	12	6	22	40	0	-37.4281	12.5062	0.10532
2015	12	6	22	42	0	-37.4343	12.5022	0.106061
2015	12	6	22	44	0	-37.4405	12.4983	0.0971621
2015	12	6	22	46	0	-37.4469	12.4943	0.0956789
2015	12	6	22	48	0	-37.4532	12.4904	0.0964205
2015	12	6	22	52	0	-37.4652	12.4829	0.117185
2015	12	6	22	54	0	-37.4745	12.4771	0.122376
2015	12	6	22	55	0	-37.4771	12.4755	0.120893
2015	12	6	22	56	0	-37.4796	12.474	0.121635
2015	12	6	22	58	0	-37.482	12.4724	0.0941957
2015	12	6	23	0	0	-37.4937	12.4653	0.108286
2015	12	6	23	1	0	-37.496	12.4639	0.0971621
2015	12	6	23	3	0	-37.5051	12.4583	0.0860381
2015	12	6	23	4	0	-37.5074	12.4568	0.0875213
2015	12	6	23	5	0	-37.5098	12.4554	0.0801054
2015	12	6	23	7	0	-37.5188	12.4497	0.0927125
2015	12	6	23	8	0	-37.521	12.4483	0.114219
2015	12	6	23	10	0	-37.5289	12.4434	0.126084
2015	12	6	23	11	0	-37.5312	12.442	0.151299
2015	12	6	23	12	0	-37.5334	12.4406	0.158715
2015	12	6	23	13	0	-37.5358	12.4391	0.177996
2015	12	6	23	15	0	-37.5449	12.4336	0.20321
2015	12	6	23	16	0	-37.5472	12.4321	0.194311
2015	12	6	23	17	0	-37.5495	12.4307	0.198761
2015	12	6	23	19	0	-37.5584	12.4253	0.19357
2015	12	6	23	20	0	-37.5607	12.4238	0.195053
2015	12	6	23	21	0	-37.5629	12.4224	0.172805
2015	12	6	23	23	0	-37.5719	12.4169	0.173546
2015	12	6	23	24	0	-37.5741	12.4155	0.160198
2015	12	6	23	25	0	-37.5764	12.414	0.140916
2015	12	6	23	27	0	-37.5853	12.4086	0.116444
2015	12	6	23	28	0	-37.5877	12.4071	0.100128
2015	12	6	23	30	0	-37.5954	12.4021	0.0674982
2015	12	6	23	31	0	-37.5977	12.4006	0.0400592
2015	12	6	23	32	0	-37.6001	12.3991	0.0237441
2015	12	7	2	41	0	-38.2471	11.9956	0.935166
2015	12	7	2	43	0	-38.2563	11.9899	1.11611
2015	12	7	5	59	0	-38.8837	11.5735	0.17774
2015	12	7	9	58	0	-39.6305	11.0428	0.425155
2015	12	7	13	57	0	-40.3874	10.5219	0.591356
2015	12	7	17	57	0	-41.1869	9.98648	0.530334
2015	12	7	19	38	0	-41.5073	9.74466	0.0200361
2015	12	7	19	40	0	-41.5093	9.74303	0.0192945
2015	12	7	19	42	0	-41.5194	9.73443	0.0141033
2015	12	7	19	43	0	-41.5215	9.73256	0.0259688
2015	12	7	19	45	0	-41.5297	9.72565	0.038576
2015	12	7	19	46	0	-41.5319	9.72385	0.0378344
2015	12	7	19	47	0	-41.534	9.72208	0.0326432
2015	12	7	19	49	0	-41.5423	9.71508	0.0474751
2015	12	7	19	50	0	-41.5444	9.71325	0.0511831
2015	12	7	19	51	0	-41.5466	9.71142	0.0400592
2015	12	7	19	53	0	-41.5547	9.70471	0.0474751
2015	12	7	19	54	0	-41.5568	9.70285	0.0467335
2015	12	7	19	55	0	-41.559	9.701	0.0548911
2015	12	7	19	57	0	-41.5662	9.69488	0.0593407
2015	12	7	19	59	0	-41.5721	9.69005	0.0756558
2015	12	7	20	1	0	-41.5778	9.68509	0.0682398
2015	12	7	20	3	0	-41.5835	9.68031	0.066015
2015	12	7	20	5	0	-41.5893	9.67541	0.0600823
2015	12	7	20	9	0	-41.6014	9.66515	0.0593407
2015	12	7	20	11	0	-41.6099	9.65801	0.0741726
2015	12	7	20	12	0	-41.6122	9.65609	0.0756558
2015	12	7	20	13	0	-41.6145	9.65419	0.0823301
2015	12	7	20	14	0	-41.6167	9.65239	0.0778806
2015	12	7	20	17	0	-41.6274	9.64336	0.0637902
2015	12	7	20	19	0	-41.6345	9.63736	0.0689814
2015	12	7	20	20	0	-41.6366	9.63562	0.669674
2015	12	7	20	21	0	-41.6388	9.63382	0.0904877
2015	12	7	20	23	0	-41.6469	9.62681	0.109769
2015	12	7	20	24	0	-41.649	9.62509	0.109769
2015	12	7	20	25	0	-41.6511	9.62337	0.111994
2015	12	7	20	26	0	-41.6533	9.62157	0.120893
2015	12	7	20	28	0	-41.6615	9.61463	0.124601
2015	12	7	20	29	0	-41.6636	9.61283	0.117927
2015	12	7	20	30	0	-41.6657	9.61106	0.117927
2015	12	7	20	32	0	-41.674	9.60404	0.106061
2015	12	7	20	33	0	-41.6761	9.60226	0.0986453
2015	12	7	20	34	0	-41.6783	9.60044	0.0971621
2015	12	7	20	36	0	-41.6865	9.59351	0.0815885
2015	12	7	20	37	0	-41.6876	9.5926	0.0674982
2015	12	7	20	39	0	-41.6956	9.58565	0.0541495
2015	12	7	20	40	0	-41.6978	9.58386	0.042284
2015	12	7	20	41	0	-41.6998	9.58215	0.969279
2015	12	7	20	42	0	-41.7018	9.58046	0.0860381
2015	12	7	20	44	0	-41.7097	9.57378	0.0778806
2015	12	7	20	45	0	-41.7117	9.57205	0.185412
2015	12	7	20	46	0	-41.7138	9.5702	0.080847
2015	12	7	20	48	0	-41.7219	9.56328	0.0815885
2015	12	7	20	49	0	-41.724	9.5615	0.0867797
2015	12	7	20	50	0	-41.726	9.5598	0.0756558
2015	12	7	20	52	0	-41.7341	9.55305	0.0726894
2015	12	7	20	53	0	-41.7361	9.55128	0.0571159
2015	12	7	20	54	0	-41.7382	9.54952	0.0763974
2015	12	7	20	56	0	-41.7466	9.5424	0.0726894
2015	12	7	20	57	0	-41.7477	9.54148	0.066015
2015	12	7	20	59	0	-41.7558	9.53466	0.0571159
2015	12	7	21	0	0	-41.758	9.5329	0.0608239
2015	12	7	21	1	0	-41.76	9.53114	0.0637902
2015	12	7	21	3	0	-41.7684	9.52384	0.0578575
2015	12	7	21	4	0	-41.7705	9.52215	0.0452503
2015	12	7	21	5	0	-41.7726	9.52042	0.0548911
2015	12	7	21	7	0	-41.781	9.51333	0.0430256
2015	12	7	21	8	0	-41.7832	9.51146	0.0452503
2015	12	7	21	9	0	-41.7854	9.50969	0.0408008
2015	12	7	21	10	0	-41.7876	9.50792	0.027452
2015	12	7	21	12	0	-41.7958	9.50113	0.0281936
2015	12	7	21	13	0	-41.7979	9.49935	0.0304184
2015	12	7	21	14	0	-41.7999	9.49758	0.03116
2015	12	7	21	16	0	-41.8081	9.49054	0.0289352
2015	12	7	21	17	0	-41.8091	9.48969	0.0304184
2015	12	7	21	19	0	-41.8173	9.48282	0.0341264
2015	12	7	21	20	0	-41.8194	9.481	0.0289352
2015	12	7	21	21	0	-41.8216	9.47919	0.0267104
2015	12	7	21	23	0	-41.8299	9.47236	0.0326432
2015	12	7	21	24	0	-41.832	9.47048	0.0259688
2015	12	7	21	25	0	-41.8342	9.4686	0.0252273
2015	12	7	21	26	0	-41.8364	9.46662	0.034868
2015	12	7	21	28	0	-41.8446	9.45984	0.027452
2015	12	7	21	29	0	-41.8467	9.45808	0.0289352
2015	12	7	21	30	0	-41.8488	9.45633	0.0356096
2015	12	7	21	32	0	-41.857	9.44926	0.0378344
2015	12	7	21	33	0	-41.8591	9.44748	0.0415424
2015	12	7	21	34	0	-41.8613	9.44561	0.0482167
2015	12	7	21	36	0	-41.8695	9.43859	0.0474751
2015	12	7	21	37	0	-41.8706	9.43768	0.0637902
2015	12	7	21	39	0	-41.8787	9.43093	0.0623071
2015	12	7	21	40	0	-41.8808	9.42915	0.0585991
2015	12	7	21	41	0	-41.8829	9.42739	0.0593407
2015	12	7	21	43	0	-41.8912	9.42032	0.066015
2015	12	7	21	44	0	-41.8934	9.41854	0.0801054
2015	12	7	21	45	0	-41.8955	9.41678	0.0786222
2015	12	7	21	46	0	-41.8976	9.41501	0.0860381
2015	12	7	21	48	0	-41.9059	9.40794	0.0741726
2015	12	7	21	50	0	-41.9102	9.40413	0.101612
2015	12	7	21	52	0	-41.9183	9.3973	0.10532
2015	12	7	21	53	0	-41.9205	9.39548	0.0971621
2015	12	7	21	54	0	-41.9226	9.39372	0.0912293
2015	12	7	21	56	0	-41.9307	9.38693	0.100128
2015	12	7	21	57	0	-41.9317	9.38608	0.0845549
2015	12	7	21	59	0	-41.9398	9.37925	0.0882629
2015	12	7	22	0	0	-41.9419	9.37744	0.0971621
2015	12	7	22	1	0	-41.944	9.37564	0.0919709
2015	12	7	22	3	0	-41.9519	9.36907	0.080847
2015	12	7	22	4	0	-41.9539	9.36734	0.0897461
2015	12	7	22	5	0	-41.956	9.36556	0.0912293
2015	12	7	22	6	0	-41.9581	9.36378	0.0971621
2015	12	7	22	8	0	-41.9661	9.3569	0.0927125
2015	12	7	22	9	0	-41.9681	9.35512	0.104578
2015	12	7	22	10	0	-41.9702	9.35336	0.0927125
2015	12	7	22	12	0	-41.9782	9.34651	0.0993869
2015	12	7	22	13	0	-41.9803	9.34473	0.0904877
2015	12	7	22	14	0	-41.9823	9.343	0.077139
2015	12	7	22	16	0	-41.9904	9.33624	0.0756558
2015	12	7	22	17	0	-41.9914	9.33539	0.066015
2015	12	7	22	19	0	-41.9994	9.32868	0.080847
2015	12	7	22	20	0	-42.0013	9.32707	0.0726894
2015	12	7	22	21	0	-42.0033	9.32537	0.080847
2015	12	7	22	23	0	-42.0114	9.31847	0.0712062
2015	12	7	22	24	0	-42.0134	9.31677	0.287752
2015	12	7	22	25	0	-42.0155	9.31507	0.0786222
2015	12	7	22	27	0	-42.0235	9.30819	0.069723
2015	12	7	22	28	0	-42.0256	9.30638	0.03116
2015	12	7	22	29	0	-42.0278	9.30453	0.0296768
2015	12	7	22	33	0	-42.0394	9.29466	0.0259688
2015	12	7	23	41	0	-42.2491	9.11626	0.0163281
2015	12	7	23	48	0	-42.2681	9.10019	0.1335
2015	12	7	23	51	0	-42.2783	9.09146	0.441263
2015	12	7	23	52	0	-42.2804	9.08968	0.41679
2015	12	7	23	54	0	-42.2884	9.08268	0.421981
2015	12	7	23	58	0	-42.3009	9.07192	0.257347
2015	12	7	23	59	0	-42.3021	9.07104	0.210626
2015	12	8	0	1	0	-42.3043	9.06933	0.256605
2015	12	8	0	2	0	-42.3125	9.06226	0.206918
2015	12	8	0	4	0	-42.3167	9.05867	0.157231
2015	12	8	0	6	0	-42.3249	9.05165	0.103095
2015	12	8	0	7	0	-42.327	9.04984	0.121635
2015	12	8	0	8	0	-42.3292	9.04801	0.186895
2015	12	8	0	11	0	-42.3394	9.03923	0.559176
2015	12	8	0	12	0	-42.3415	9.03742	0.487983
2015	12	8	0	14	0	-42.3497	9.03036	0.60738
2015	12	8	0	15	0	-42.3519	9.02854	0.339664
2015	12	8	0	16	0	-42.3541	9.02671	0.576233
2015	12	8	0	18	0	-42.3624	9.01963	0.444229
2015	12	8	0	19	0	-42.3635	9.01873	0.37971
2015	12	8	0	21	0	-42.3655	9.01698	0.409374
2015	12	8	0	22	0	-42.3738	9.01002	0.538412
2015	12	8	0	23	0	-42.3759	9.00823	0.516164
2015	12	8	0	24	0	-42.378	9.00635	0.543603
2015	12	8	0	26	0	-42.3863	8.99902	0.441263
2015	12	8	0	27	0	-42.3884	8.99724	0.525063
2015	12	8	0	28	0	-42.3906	8.99546	0.533962
2015	12	8	0	30	0	-42.3988	8.98853	0.457578
2015	12	8	0	31	0	-42.401	8.98674	0.551019
2015	12	8	0	32	0	-42.4032	8.98487	0.411599
2015	12	8	0	34	0	-42.4117	8.97752	0.522838
2015	12	8	0	35	0	-42.4139	8.97569	0.539153
2015	12	8	0	36	0	-42.4161	8.97388	0.503557
2015	12	8	0	37	0	-42.4181	8.97212	0.590323
2015	12	8	0	39	0	-42.4256	8.96582	0.53767
2015	12	8	0	40	0	-42.4278	8.96397	0.392317
2015	12	8	0	42	0	-42.4362	8.95679	0.590323
2015	12	8	0	43	0	-42.4384	8.95497	0.462027
2015	12	8	0	44	0	-42.4405	8.95316	0.513939
2015	12	8	0	46	0	-42.4489	8.94603	0.473151
2015	12	8	0	47	0	-42.451	8.94422	0.526546
2015	12	8	0	48	0	-42.4531	8.94234	0.517647
2015	12	8	0	50	0	-42.4617	8.93487	0.469443
2015	12	8	0	51	0	-42.4639	8.93302	0.476118
2015	12	8	0	52	0	-42.466	8.93124	0.525063
2015	12	8	0	54	0	-42.4745	8.924	0.605155
2015	12	8	0	55	0	-42.4766	8.92213	0.531737
2015	12	8	0	56	0	-42.4788	8.92023	0.46351
2015	12	8	0	58	0	-42.4872	8.91332	0.576975
2015	12	8	0	59	0	-42.4881	8.91245	0.387126
2015	12	8	1	1	0	-42.4901	8.91067	0.514681
2015	12	8	1	2	0	-42.4984	8.90339	0.462769
2015	12	8	1	4	0	-42.5043	8.89835	0.390834
2015	12	8	1	6	0	-42.5101	8.89338	0.470926
2015	12	8	1	8	0	-42.5161	8.88844	0.508748
2015	12	8	1	10	0	-42.5219	8.88336	0.539153
2015	12	8	1	14	0	-42.534	8.87291	0.535445
2015	12	8	1	16	0	-42.5424	8.86579	0.445712
2015	12	8	1	17	0	-42.5446	8.86385	0.318899
2015	12	8	1	18	0	-42.5469	8.86187	0.470185
2015	12	8	1	20	0	-42.5544	8.85561	0.313708
2015	12	8	1	22	0	-42.5588	8.85173	0.510973
2015	12	8	1	24	0	-42.5673	8.84455	0.461286
2015	12	8	1	25	0	-42.5695	8.84273	0.516905
2015	12	8	1	26	0	-42.5716	8.84089	0.513939
2015	12	8	1	27	0	-42.5737	8.83906	0.448679
2015	12	8	1	29	0	-42.582	8.83184	0.533962
2015	12	8	1	30	0	-42.584	8.83005	0.385643
2015	12	8	1	31	0	-42.5862	8.82824	0.490208
2015	12	8	1	33	0	-42.5944	8.82125	0.516905
2015	12	8	1	34	0	-42.5965	8.81946	0.438296
2015	12	8	1	35	0	-42.5987	8.81769	0.527288
2015	12	8	1	37	0	-42.6071	8.81047	0.547311
2015	12	8	1	38	0	-42.6092	8.80871	0.480567
2015	12	8	1	40	0	-42.6164	8.80256	0.48205
2015	12	8	1	41	0	-42.6185	8.80084	0.459803
2015	12	8	1	42	0	-42.6206	8.79905	0.491691
2015	12	8	1	44	0	-42.6291	8.79144	0.413082
2015	12	8	1	45	0	-42.6311	8.78966	0.352271
2015	12	8	1	46	0	-42.6333	8.78789	0.50059
2015	12	8	1	47	0	-42.6354	8.78621	0.448679
2015	12	8	1	49	0	-42.6435	8.77921	0.494658
2015	12	8	1	50	0	-42.6456	8.77736	0.582166
2015	12	8	1	51	0	-42.6477	8.77548	0.515422
2015	12	8	1	53	0	-42.6561	8.76841	0.437555
2015	12	8	1	54	0	-42.6582	8.76662	0.385643
2015	12	8	1	55	0	-42.6604	8.76487	0.345597
2015	12	8	1	57	0	-42.6691	8.75898	0.333731
2015	12	8	1	58	0	-42.6714	8.75775	0.409374
2015	12	8	2	0	0	-42.6797	8.75357	0.183929
2015	12	8	2	1	0	-42.6821	8.75232	0.186895
2015	12	8	2	2	0	-42.6845	8.7511	0.206177
2015	12	8	2	4	0	-42.691	8.7468	0.232133
2015	12	8	2	5	0	-42.6921	8.74554	0.236582
2015	12	8	2	6	0	-42.693	8.74414	0.247706
2015	12	8	2	8	0	-42.6943	8.73773	0.262538
2015	12	8	2	9	0	-42.694	8.73685	0.261055
2015	12	8	2	10	0	-42.6938	8.73629	0.253639
2015	12	8	2	11	0	-42.6936	8.73607	0.266246
2015	12	8	2	13	0	-42.6932	8.7367	0.278111
2015	12	8	2	14	0	-42.6931	8.73693	0.285527
2015	12	8	2	15	0	-42.6931	8.73719	0.292202
2015	12	8	2	17	0	-42.693	8.73787	0.301843
2015	12	8	2	18	0	-42.693	8.73788	0.284786
2015	12	8	2	20	0	-42.6931	8.73748	0.27292
2015	12	8	2	21	0	-42.6931	8.73727	0.256605
2015	12	8	2	22	0	-42.6931	8.73704	0.241032
2015	12	8	2	24	0	-42.6933	8.73658	0.252897
2015	12	8	2	25	0	-42.6932	8.73658	0.242515
2015	12	8	2	26	0	-42.6932	8.73657	0.232133
2015	12	8	2	28	0	-42.6932	8.73655	0.239548
2015	12	8	2	29	0	-42.6932	8.73656	0.238807
2015	12	8	2	30	0	-42.6932	8.73656	0.257347
2015	12	8	2	31	0	-42.6932	8.73655	0.257347
2015	12	8	2	33	0	-42.6932	8.73655	0.25883
2015	12	8	2	34	0	-42.6932	8.73655	0.258088
2015	12	8	2	35	0	-42.6932	8.73655	0.25438
2015	12	8	2	37	0	-42.6932	8.73655	0.269954
2015	12	8	2	38	0	-42.6932	8.73655	0.251414
2015	12	8	2	40	0	-42.6932	8.73655	0.245481
2015	12	8	2	41	0	-42.6932	8.73654	0.241773
2015	12	8	2	42	0	-42.6933	8.73653	0.260313
2015	12	8	2	44	0	-42.6933	8.73655	0.251414
2015	12	8	2	45	0	-42.6932	8.73654	0.249931
2015	12	8	2	46	0	-42.6933	8.73653	0.241773
2015	12	8	2	48	0	-42.6933	8.73653	0.242515
2015	12	8	2	49	0	-42.6933	8.73654	0.255864
2015	12	8	2	50	0	-42.6932	8.73654	0.251414
2015	12	8	2	51	0	-42.6932	8.73653	0.252156
2015	12	8	2	53	0	-42.6932	8.73655	0.24474
2015	12	8	2	54	0	-42.6932	8.73655	0.252897
2015	12	8	2	55	0	-42.6933	8.73655	0.256605
2015	12	8	2	57	0	-42.6933	8.73654	0.24474
2015	12	8	2	58	0	-42.6933	8.73654	0.248448
2015	12	8	3	0	0	-42.6933	8.73655	0.248448
2015	12	8	3	1	0	-42.6933	8.73654	0.235099
2015	12	8	3	2	0	-42.6933	8.73653	0.236582
2015	12	8	3	4	0	-42.6932	8.73657	0.230649
2015	12	8	3	5	0	-42.6932	8.73655	0.227683
2015	12	8	3	6	0	-42.6933	8.73653	0.227683
2015	12	8	3	8	0	-42.6933	8.73653	0.245481
2015	12	8	3	9	0	-42.6933	8.73655	0.242515
2015	12	8	3	10	0	-42.6932	8.73655	0.252897
2015	12	8	3	11	0	-42.6932	8.73655	0.235841
2015	12	8	3	13	0	-42.6933	8.73655	0.234357
2015	12	8	3	14	0	-42.6933	8.73656	0.236582
2015	12	8	3	15	0	-42.6933	8.73656	0.234357
2015	12	8	3	17	0	-42.6933	8.73655	0.224717
2015	12	8	3	18	0	-42.6933	8.73655	0.211368
2015	12	8	3	20	0	-42.6933	8.73655	0.213593
2015	12	8	3	21	0	-42.6933	8.73655	0.210626
2015	12	8	3	22	0	-42.6933	8.73655	0.209885
2015	12	8	3	24	0	-42.6932	8.73655	0.20321
2015	12	8	3	25	0	-42.6933	8.73654	0.208401
2015	12	8	3	26	0	-42.6933	8.73654	0.20766
2015	12	8	3	27	0	-42.6933	8.73655	0.204693
2015	12	8	3	29	0	-42.6933	8.73654	1.11241
2015	12	8	3	30	0	-42.6933	8.73653	0.29146
2015	12	8	3	31	0	-42.6933	8.73654	0.267729
2015	12	8	3	33	0	-42.6933	8.73656	0.287752
2015	12	8	3	34	0	-42.6933	8.73656	0.275145
2015	12	8	3	36	0	-42.6933	8.73654	0.252897
2015	12	8	3	38	0	-42.6933	8.73655	0.20766
2015	12	8	3	41	0	-42.6933	8.73653	0.176513
2015	12	8	3	43	0	-42.6933	8.73656	0.143883
2015	12	8	10	58	0	-42.7797	8.86808	0.714841
2015	12	8	14	57	0	-43.3009	8.17212	1.39906
2015	12	8	18	59	0	-44.0034	7.5122	2.73954
2015	12	8	19	58	0	-44.1863	7.33948	1.43648
2015	12	8	19	59	0	-44.1885	7.33749	1.44168
2015	12	8	20	0	0	-44.1905	7.33556	1.41053
2015	12	8	20	1	0	-44.1926	7.33362	1.4261
2015	12	8	20	3	0	-44.2007	7.3258	1.41498
2015	12	8	20	4	0	-44.2018	7.32479	1.39125
2015	12	8	20	6	0	-44.2101	7.31724	1.41794
2015	12	8	20	7	0	-44.2121	7.31517	1.41943
2015	12	8	20	8	0	-44.2141	7.3131	1.39347
2015	12	8	20	10	0	-44.2224	7.30535	1.39866
2015	12	8	20	11	0	-44.2244	7.30342	1.37197
2015	12	8	20	12	0	-44.2264	7.30149	1.40089
2015	12	8	20	14	0	-44.2346	7.29397	1.3868
2015	12	8	20	15	0	-44.2367	7.29191	1.38161
2015	12	8	20	16	0	-44.2388	7.28985	1.34749
2015	12	8	20	18	0	-44.2471	7.28193	1.38161
2015	12	8	20	19	0	-44.2491	7.27991	1.3156
2015	12	8	20	20	0	-44.2512	7.27793	1.33934
2015	12	8	20	21	0	-44.2534	7.27592	1.32228
2015	12	8	20	23	0	-44.2616	7.26804	1.30522
2015	12	8	20	24	0	-44.2627	7.26706	1.27482
2015	12	8	20	26	0	-44.2709	7.25913	1.27852
2015	12	8	20	27	0	-44.273	7.25707	1.27037
2015	12	8	20	28	0	-44.2752	7.25502	1.28001
2015	12	8	20	30	0	-44.2833	7.2475	1.27111
2015	12	8	20	31	0	-44.2853	7.24569	1.25479
2015	12	8	20	32	0	-44.2873	7.24387	1.23774
2015	12	8	20	34	0	-44.2955	7.2359	1.23551
2015	12	8	20	35	0	-44.2976	7.23393	1.22068
2015	12	8	20	36	0	-44.2997	7.23192	1.2229
2015	12	8	20	38	0	-44.3077	7.22439	1.23551
2015	12	8	20	39	0	-44.3097	7.2224	1.20807
2015	12	8	20	40	0	-44.3118	7.22042	1.22587
2015	12	8	20	41	0	-44.3139	7.21843	1.20362
2015	12	8	20	43	0	-44.3222	7.21078	1.22587
2015	12	8	20	44	0	-44.3232	7.20989	1.23106
2015	12	8	20	46	0	-44.3313	7.20195	1.21994
2015	12	8	20	47	0	-44.3335	7.19995	1.24886
2015	12	8	20	48	0	-44.3357	7.19791	1.2763
2015	12	8	20	50	0	-44.3436	7.1906	1.27852
2015	12	8	20	51	0	-44.3456	7.18863	1.26073
2015	12	8	20	52	0	-44.3475	7.18669	1.2674
2015	12	8	20	54	0	-44.3552	7.17928	1.2674
2015	12	8	20	55	0	-44.3572	7.17739	1.28149
2015	12	8	20	56	0	-44.3592	7.17539	1.28223
2015	12	8	20	58	0	-44.3674	7.16758	1.29187
2015	12	8	20	59	0	-44.3695	7.16558	1.26369
2015	12	8	21	0	0	-44.3715	7.16369	1.27037
2015	12	8	21	1	0	-44.3736	7.16179	1.23625
2015	12	8	21	3	0	-44.3815	7.15418	1.24515
2015	12	8	21	4	0	-44.3825	7.15318	1.24144
2015	12	8	21	6	0	-44.3905	7.14574	1.22884
2015	12	8	21	7	0	-44.3925	7.14384	1.21697
2015	12	8	21	8	0	-44.3944	7.14195	1.22216
2015	12	8	21	10	0	-44.4024	7.13429	1.2281
2015	12	8	21	11	0	-44.4045	7.13229	1.20659
2015	12	8	21	12	0	-44.4065	7.1304	1.22958
2015	12	8	21	14	0	-44.4145	7.12299	1.22142
2015	12	8	21	15	0	-44.4165	7.12096	1.20659
2015	12	8	21	16	0	-44.4186	7.11892	1.20881
2015	12	8	21	18	0	-44.4266	7.11139	1.19102
2015	12	8	21	19	0	-44.4287	7.1094	1.19843
2015	12	8	21	20	0	-44.4306	7.10755	1.19695
2015	12	8	21	22	0	-44.4386	7.09996	1.16951
2015	12	8	21	23	0	-44.4406	7.098	1.1569
2015	12	8	21	24	0	-44.4415	7.09707	1.14726
2015	12	8	21	26	0	-44.4495	7.08951	1.10944
2015	12	8	21	27	0	-44.4516	7.08752	1.12205
2015	12	8	21	28	0	-44.4536	7.08556	1.09683
2015	12	8	21	30	0	-44.4615	7.07816	1.082
2015	12	8	21	31	0	-44.4636	7.07624	1.54995
2015	12	8	21	32	0	-44.4656	7.07432	1.23403
2015	12	8	21	34	0	-44.4735	7.06693	1.19769
2015	12	8	21	35	0	-44.4754	7.06512	1.18138
2015	12	8	21	36	0	-44.4774	7.06323	1.17544
2015	12	8	21	38	0	-44.4853	7.05542	1.15987
2015	12	8	21	39	0	-44.4874	7.05342	1.16135
2015	12	8	21	40	0	-44.4894	7.05151	1.12946
2015	12	8	21	42	0	-44.4915	7.04963	1.14949
2015	12	8	21	43	0	-44.4994	7.042	1.16135
2015	12	8	21	44	0	-44.5005	7.04095	1.15913
2015	12	8	21	46	0	-44.5086	7.03328	1.14355
2015	12	8	21	47	0	-44.5107	7.03132	1.14504
2015	12	8	21	49	0	-44.5164	7.02594	1.14355
2015	12	8	21	51	0	-44.5219	7.02087	1.15097
2015	12	8	21	53	0	-44.5274	7.01559	1.13021
2015	12	8	21	55	0	-44.5329	7.0102	1.12131
2015	12	8	22	0	0	-44.5502	6.9935	1.12576
2015	12	8	22	1	0	-44.5523	6.99158	1.11686
2015	12	8	22	2	0	-44.5545	6.98961	1.10796
2015	12	8	22	3	0	-44.5568	6.98757	1.09832
2015	12	8	22	5	0	-44.5637	6.98063	1.0731
2015	12	8	22	8	0	-44.5741	6.97064	1.08571
2015	12	8	22	9	0	-44.5762	6.96856	1.082
2015	12	8	22	10	0	-44.5784	6.96657	1.07014
2015	12	8	22	11	0	-44.5805	6.96477	0.542861
2015	12	8	22	13	0	-44.5885	6.95715	1.08719
2015	12	8	22	14	0	-44.5906	6.95519	1.04789
2015	12	8	22	15	0	-44.5927	6.95316	1.03528
2015	12	8	22	17	0	-44.6008	6.94548	1.03825
2015	12	8	22	18	0	-44.6029	6.94347	1.04344
2015	12	8	22	19	0	-44.6049	6.94153	1.04418
2015	12	8	22	21	0	-44.6126	6.93411	1.07829
2015	12	8	22	22	0	-44.6146	6.93216	1.04937
2015	12	8	22	23	0	-44.6166	6.93016	1.03083
2015	12	8	22	25	0	-44.6236	6.92349	1.04492
2015	12	8	22	26	0	-44.6257	6.92154	1.04121
2015	12	8	22	28	0	-44.6337	6.91399	1.0249
2015	12	8	22	29	0	-44.6357	6.91212	1.02416
2015	12	8	22	30	0	-44.6377	6.91015	1.01897
2015	12	8	22	32	0	-44.6397	6.90815	1.01155
2015	12	8	22	33	0	-44.6477	6.90044	1.00413
2015	12	8	22	34	0	-44.6498	6.89855	1.0071
2015	12	8	22	35	0	-44.652	6.89657	0.99746
2015	12	8	22	37	0	-44.6598	6.88919	0.984852
2015	12	8	22	38	0	-44.6619	6.88712	0.987077
2015	12	8	22	39	0	-44.6639	6.88508	1.00043
2015	12	8	22	41	0	-44.6718	6.87749	1.01897
2015	12	8	22	42	0	-44.6738	6.87551	1.02861
2015	12	8	22	43	0	-44.6758	6.87353	1.03009
2015	12	8	22	45	0	-44.6826	6.86721	1.0516
2015	12	8	22	46	0	-44.6846	6.86532	1.03825
2015	12	8	22	48	0	-44.6922	6.85794	1.05308
2015	12	8	22	49	0	-44.6941	6.85621	1.03454
2015	12	8	22	50	0	-44.6961	6.85442	1.01897
2015	12	8	22	51	0	-44.6981	6.85251	1.00562
2015	12	8	22	53	0	-44.7059	6.84499	0.542861
2015	12	8	22	54	0	-44.7078	6.84313	1.00265
2015	12	8	22	55	0	-44.7098	6.84129	1.00117
2015	12	8	22	57	0	-44.7174	6.83415	1.02638
2015	12	8	22	58	0	-44.7194	6.83212	1.016
2015	12	8	22	59	0	-44.7214	6.83013	0.998943
2015	12	8	23	1	0	-44.7292	6.82282	1.01229
2015	12	8	23	2	0	-44.7311	6.82096	1.00413
2015	12	8	23	3	0	-44.7331	6.81905	1.01822
2015	12	8	23	5	0	-44.7397	6.81263	1.04566
2015	12	8	23	6	0	-44.7416	6.81074	1.03751
2015	12	8	23	8	0	-44.7494	6.80359	1.0338
2015	12	8	23	9	0	-44.7512	6.80173	0.984111
2015	12	8	23	10	0	-44.7531	6.79981	0.976695
2015	12	8	23	11	0	-44.7551	6.79778	0.976695
2015	12	8	23	13	0	-44.763	6.79007	0.967796
2015	12	8	23	14	0	-44.7651	6.7881	0.981886
2015	12	8	23	15	0	-44.7672	6.78618	0.949256
2015	12	8	23	17	0	-44.7753	6.77856	0.959638
2015	12	8	23	18	0	-44.7774	6.77663	0.962605
2015	12	8	23	19	0	-44.7794	6.77465	0.955189
2015	12	8	23	21	0	-44.7874	6.76698	0.965571
2015	12	8	23	22	0	-44.7893	6.76521	0.961121
2015	12	8	23	23	0	-44.7911	6.76357	0.949256
2015	12	8	23	25	0	-44.7973	6.75792	0.952964
2015	12	8	23	26	0	-44.7991	6.75612	0.945548
2015	12	8	23	28	0	-44.801	6.75427	0.940357
2015	12	8	23	29	0	-44.8082	6.7472	0.956672
2015	12	8	23	30	0	-44.8102	6.74535	0.951481
2015	12	8	23	31	0	-44.8121	6.7435	0.932941
2015	12	8	23	33	0	-44.8193	6.7364	0.926266
2015	12	8	23	34	0	-44.8212	6.73457	0.927008
2015	12	8	23	35	0	-44.8231	6.73273	0.939615
2015	12	8	23	37	0	-44.8306	6.72559	0.928491
2015	12	8	23	38	0	-44.8325	6.72379	0.954447
2015	12	8	23	39	0	-44.8345	6.72197	0.93739
2015	12	8	23	41	0	-44.8421	6.71482	0.943323
2015	12	8	23	42	0	-44.844	6.71284	0.930716
2015	12	8	23	43	0	-44.8459	6.71081	0.932199
2015	12	8	23	45	0	-44.8527	6.70448	0.917367
2015	12	8	23	46	0	-44.8547	6.70255	0.886962
2015	12	8	23	48	0	-44.862	6.69557	0.900311
2015	12	8	23	49	0	-44.8638	6.69408	0.900311
2015	12	8	23	50	0	-44.8656	6.69253	0.901052
2015	12	8	23	51	0	-44.8674	6.69085	0.924042
2015	12	8	23	53	0	-44.8747	6.68328	0.913659
2015	12	8	23	54	0	-44.8767	6.68121	0.922558
2015	12	8	23	55	0	-44.8788	6.6792	0.871388
2015	12	8	23	57	0	-44.8867	6.67166	0.869905
2015	12	8	23	58	0	-44.8887	6.66976	0.878804
2015	12	8	23	59	0	-44.8907	6.66784	0.863972
2015	12	9	0	1	0	-44.8983	6.66072	0.883254
2015	12	9	0	2	0	-44.9003	6.65878	0.906243
2015	12	9	0	3	0	-44.9023	6.65687	0.897344
2015	12	9	0	5	0	-44.909	6.65032	0.90921
2015	12	9	0	6	0	-44.911	6.64845	0.915142
2015	12	9	0	8	0	-44.9189	6.64093	0.921075
2015	12	9	0	9	0	-44.9209	6.63905	0.924783
2015	12	9	0	10	0	-44.9229	6.63711	0.921075
2015	12	9	0	11	0	-44.925	6.63518	0.924042
2015	12	9	0	13	0	-44.9326	6.62783	0.919592
2015	12	9	0	14	0	-44.9346	6.62586	0.93739
2015	12	9	0	15	0	-44.9366	6.62392	0.932199
2015	12	9	0	17	0	-44.9441	6.61671	0.958897
2015	12	9	0	18	0	-44.9461	6.61484	0.972987
2015	12	9	0	19	0	-44.948	6.61301	0.994493
2015	12	9	0	21	0	-44.9534	6.60785	1.01377
2015	12	9	0	24	0	-44.9642	6.59739	1.06643
2015	12	9	0	26	0	-44.9686	6.59325	1.12724
2015	12	9	0	28	0	-44.9742	6.58826	1.13836
2015	12	9	0	32	0	-44.9866	6.57937	1.15839
2015	12	9	0	33	0	-44.9889	6.57787	1.17173
2015	12	9	0	35	0	-44.9962	6.57286	1.148
2015	12	9	0	36	0	-44.9975	6.57199	1.15764
2015	12	9	0	37	0	-44.9988	6.57112	1.13985
2015	12	9	0	40	0	-45.0023	6.56613	1.13095
2015	12	9	0	41	0	-45.0021	6.56531	1.12427
2015	12	9	0	42	0	-45.0018	6.56471	1.12798
2015	12	9	0	44	0	-45.001	6.56379	1.1354
2015	12	9	0	45	0	-45.001	6.56378	1.11834
2015	12	9	0	47	0	-45.001	6.56348	1.1176
2015	12	9	0	48	0	-45.001	6.56333	1.12501
2015	12	9	0	49	0	-45.0012	6.56316	1.12872
2015	12	9	0	51	0	-45.0015	6.56237	1.14652
2015	12	9	0	52	0	-45.0016	6.56228	1.14133
2015	12	9	0	53	0	-45.0017	6.56221	1.14578
2015	12	9	0	55	0	-45.0017	6.56215	1.14875
2015	12	9	0	56	0	-45.0017	6.56215	1.15913
2015	12	9	0	57	0	-45.0017	6.56215	1.16654
2015	12	9	0	58	0	-45.0017	6.56215	1.1569
2015	12	9	1	0	0	-45.0017	6.56215	1.16135
2015	12	9	1	1	0	-45.0017	6.56216	1.16209
2015	12	9	1	2	0	-45.0017	6.56216	1.1747
2015	12	9	1	4	0	-45.0017	6.56215	1.16061
2015	12	9	1	5	0	-45.0017	6.56216	1.17693
2015	12	9	1	7	0	-45.0017	6.56215	1.17173
2015	12	9	1	8	0	-45.0017	6.56214	1.16803
2015	12	9	1	9	0	-45.0017	6.56213	1.18731
2015	12	9	1	11	0	-45.0017	6.56213	1.15542
2015	12	9	1	12	0	-45.0017	6.56214	1.13836
2015	12	9	1	13	0	-45.0017	6.56214	1.14875
2015	12	9	1	15	0	-45.0017	6.56213	1.14133
2015	12	9	1	16	0	-45.0017	6.56212	1.13836
2015	12	9	1	17	0	-45.0017	6.56212	1.17767
2015	12	9	1	18	0	-45.0017	6.56212	1.17618
2015	12	9	1	20	0	-45.0017	6.56215	1.22439
2015	12	9	1	21	0	-45.0017	6.56214	1.20436
2015	12	9	1	22	0	-45.0017	6.56213	1.19027
2015	12	9	1	24	0	-45.0017	6.56212	1.19027
2015	12	9	1	25	0	-45.0017	6.56212	1.18953
2015	12	9	1	27	0	-45.0017	6.56213	1.19398
2015	12	9	1	28	0	-45.0017	6.56213	1.1836
2015	12	9	1	29	0	-45.0017	6.56212	1.18953
2015	12	9	1	31	0	-45.0017	6.56212	1.19769
2015	12	9	1	32	0	-45.0017	6.56213	1.17841
2015	12	9	1	33	0	-45.0017	6.56212	1.19695
2015	12	9	1	34	0	-45.0017	6.5621	1.18508
2015	12	9	1	36	0	-45.0017	6.56212	1.21549
2015	12	9	1	37	0	-45.0017	6.56212	1.21252
2015	12	9	1	38	0	-45.0017	6.56212	1.17767
2015	12	9	1	40	0	-45.0017	6.56212	1.21475
2015	12	9	1	41	0	-45.0017	6.56212	1.20807
2015	12	9	1	42	0	-45.0017	6.56212	1.21994
2015	12	9	1	44	0	-45.0017	6.56212	1.21623
2015	12	9	1	45	0	-45.0017	6.56212	1.22068
2015	12	9	1	47	0	-45.0017	6.56212	1.21326
2015	12	9	1	48	0	-45.0017	6.56213	1.21401
2015	12	9	1	49	0	-45.0017	6.56213	1.20585
2015	12	9	1	51	0	-45.0017	6.56212	1.19769
2015	12	9	1	52	0	-45.0017	6.56212	1.20436
2015	12	9	1	53	0	-45.0017	6.56212	1.17099
2015	12	9	1	55	0	-45.0017	6.56212	1.17915
2015	12	9	1	56	0	-45.0017	6.56212	1.20288
2015	12	9	1	57	0	-45.0017	6.56212	1.20288
2015	12	9	1	58	0	-45.0017	6.56212	1.19917
2015	12	9	2	0	0	-45.0017	6.56212	1.21104
2015	12	9	2	1	0	-45.0017	6.56212	1.20436
2015	12	9	2	2	0	-45.0017	6.56213	1.22587
2015	12	9	2	4	0	-45.0017	6.56212	1.21401
2015	12	9	2	5	0	-45.0017	6.56212	1.19843
2015	12	9	2	7	0	-45.0017	6.56212	1.24664
2015	12	9	2	8	0	-45.0017	6.56212	1.23848
2015	12	9	2	9	0	-45.0017	6.56212	1.25554
2015	12	9	2	11	0	-45.0017	6.56213	1.24293
2015	12	9	2	12	0	-45.0017	6.56212	1.24219
2015	12	9	2	13	0	-45.0017	6.56212	1.25702
2015	12	9	2	15	0	-45.0017	6.56212	1.25998
2015	12	9	2	16	0	-45.0017	6.56212	1.24738
2015	12	9	2	17	0	-45.0017	6.56212	1.24886
2015	12	9	2	19	0	-45.0017	6.56213	1.24664
2015	12	9	2	20	0	-45.0017	6.56212	1.237
2015	12	9	2	21	0	-45.0017	6.56212	1.23477
2015	12	9	2	22	0	-45.0017	6.56212	1.22439
2015	12	9	2	24	0	-45.0017	6.56215	1.25183
2015	12	9	2	25	0	-45.0017	6.56215	1.23106
2015	12	9	2	27	0	-45.0017	6.56215	1.24367
2015	12	9	2	28	0	-45.0017	6.56214	1.24589
2015	12	9	2	29	0	-45.0017	6.56213	1.24219
2015	12	9	2	31	0	-45.0017	6.56213	1.24886
2015	12	9	2	32	0	-45.0017	6.56212	1.2318
2015	12	9	2	33	0	-45.0017	6.56212	1.23403
2015	12	9	2	35	0	-45.0017	6.56212	1.2229
2015	12	9	2	36	0	-45.0017	6.56212	1.24219
2015	12	9	2	37	0	-45.0017	6.56212	1.18434
2015	12	9	2	38	0	-45.0017	6.56213	1.21697
2015	12	9	2	40	0	-45.0017	6.56213	1.21401
2015	12	9	2	41	0	-45.0017	6.56213	1.22068
2015	12	9	2	42	0	-45.0017	6.56212	1.20362
2015	12	9	2	44	0	-45.0017	6.56213	1.22587
2015	12	9	2	45	0	-45.0017	6.56213	1.21623
2015	12	9	2	47	0	-45.0017	6.56212	1.21623
2015	12	9	2	48	0	-45.0017	6.56212	1.21401
2015	12	9	2	49	0	-45.0017	6.56212	1.2407
2015	12	9	2	51	0	-45.0017	6.56213	1.25405
2015	12	9	2	52	0	-45.0017	6.56212	1.23477
2015	12	9	2	54	0	-45.0017	6.56212	0.542861
2015	12	9	2	56	0	-45.0017	6.56214	1.24441
2015	12	9	2	58	0	-45.0017	6.56213	1.23551
2015	12	9	3	0	0	-45.0017	6.56212	1.237
2015	12	9	3	4	0	-45.0017	6.56212	1.21771
2015	12	9	3	6	0	-45.0017	6.56213	1.21549
2015	12	9	3	7	0	-45.0017	6.56212	1.21401
2015	12	9	3	9	0	-45.0017	6.56212	1.23403
2015	12	9	3	10	0	-45.0017	6.56212	1.22216
2015	12	9	3	12	0	-45.0017	6.56213	1.21771
2015	12	9	3	14	0	-45.0017	6.56213	1.22735
2015	12	9	3	15	0	-45.0017	6.56212	1.23106
2015	12	9	3	16	0	-45.0017	6.56212	1.21697
2015	12	9	3	18	0	-45.0017	6.56212	1.23032
2015	12	9	3	19	0	-45.0017	6.56212	1.22365
2015	12	9	3	20	0	-45.0017	6.56212	1.23477
2015	12	9	3	22	0	-45.0017	6.56212	1.24515
2015	12	9	3	23	0	-45.0017	6.56213	1.23996
2015	12	9	3	24	0	-45.0017	6.56213	1.30448
2015	12	9	3	26	0	-45.0017	6.56212	1.28742
2015	12	9	3	27	0	-45.0017	6.56211	1.30893
2015	12	9	3	28	0	-45.0017	6.56207	1.29706
2015	12	9	3	30	0	-45.0007	6.5599	1.32302
2015	12	9	3	31	0	-45.0001	6.55977	1.31115
2015	12	9	3	32	0	-44.9994	6.55994	1.32228
2015	12	9	3	34	0	-44.9965	6.56219	1.30448
2015	12	9	3	35	0	-44.9957	6.56274	1.3245
2015	12	9	3	36	0	-44.9949	6.56326	1.31486
2015	12	9	3	38	0	-44.9919	6.56479	1.33637
2015	12	9	3	39	0	-44.9911	6.56515	1.32005
2015	12	9	3	40	0	-44.9905	6.56547	1.32747
2015	12	9	3	42	0	-44.9885	6.56619	1.32154
2015	12	9	3	43	0	-44.988	6.56632	1.32747
2015	12	9	3	44	0	-44.9874	6.56657	1.31931
2015	12	9	11	0	0	-46.1099	5.48688	0.790952
2015	12	9	14	55	0	-46.7735	4.8336	0.870835
2015	12	9	18	59	0	-47.461	4.14742	0.920429
2015	12	9	20	26	0	-47.7026	3.90461	0.836533
2015	12	9	20	28	0	-47.7102	3.89689	0.820218
2015	12	9	20	29	0	-47.7111	3.89598	0.832825
2015	12	9	20	31	0	-47.7187	3.88837	0.829117
2015	12	9	20	32	0	-47.7207	3.88637	0.823185
2015	12	9	20	33	0	-47.7226	3.88442	0.812061
2015	12	9	20	35	0	-47.7302	3.8768	0.826151
2015	12	9	20	36	0	-47.7321	3.87494	0.826151
2015	12	9	20	37	0	-47.734	3.87304	0.832825
2015	12	9	20	39	0	-47.7415	3.86558	0.842466
2015	12	9	20	40	0	-47.7434	3.86356	0.84914
2015	12	9	20	41	0	-47.7452	3.86161	0.84914
2015	12	9	20	42	0	-47.7472	3.85962	0.845432
2015	12	9	20	44	0	-47.7547	3.85209	0.861748
2015	12	9	20	45	0	-47.7567	3.85018	0.858781
2015	12	9	20	46	0	-47.7586	3.8482	0.865456
2015	12	9	20	48	0	-47.7663	3.84029	0.860264
2015	12	9	20	49	0	-47.7673	3.83925	0.871388
2015	12	9	20	51	0	-47.7751	3.83159	0.863972
2015	12	9	20	52	0	-47.777	3.8297	0.86768
2015	12	9	20	53	0	-47.779	3.82771	0.874355
2015	12	9	20	55	0	-47.7866	3.81988	0.863972
2015	12	9	20	56	0	-47.7886	3.81786	0.863231
2015	12	9	20	57	0	-47.7906	3.8159	0.852848
2015	12	9	20	58	0	-47.7926	3.8139	0.863231
2015	12	9	21	0	0	-47.8002	3.80613	0.869164
2015	12	9	21	1	0	-47.8021	3.80418	0.858781
2015	12	9	21	2	0	-47.804	3.80227	0.852107
2015	12	9	21	4	0	-47.8116	3.79463	0.84914
2015	12	9	21	5	0	-47.8135	3.79268	0.861748
2015	12	9	21	7	0	-47.8188	3.78735	0.874355
2015	12	9	21	9	0	-47.824	3.78199	0.877321
2015	12	9	21	12	0	-47.834	3.77194	0.875838
2015	12	9	21	14	0	-47.8392	3.76678	0.869905
2015	12	9	21	18	0	-47.85	3.75573	0.872871
2015	12	9	21	19	0	-47.8522	3.7536	0.879546
2015	12	9	21	20	0	-47.8543	3.75145	0.895861
2015	12	9	21	22	0	-47.862	3.74368	0.882512
2015	12	9	21	23	0	-47.8641	3.74154	0.878804
2015	12	9	21	25	0	-47.8681	3.73739	0.878063
2015	12	9	21	27	0	-47.8756	3.72997	0.880287
2015	12	9	21	28	0	-47.8775	3.72803	0.877321
2015	12	9	21	30	0	-47.884	3.7213	0.883995
2015	12	9	21	31	0	-47.8859	3.71939	0.894378
2015	12	9	21	32	0	-47.8879	3.71746	0.898827
2015	12	9	21	34	0	-47.8954	3.70996	0.883254
2015	12	9	21	35	0	-47.8973	3.70801	0.883995
2015	12	9	21	36	0	-47.8992	3.70612	0.888445
2015	12	9	21	38	0	-47.9066	3.69854	0.898086
2015	12	9	21	39	0	-47.9085	3.69662	0.891411
2015	12	9	21	40	0	-47.9104	3.69475	0.902535
2015	12	9	21	42	0	-47.9179	3.68705	0.910693
2015	12	9	21	43	0	-47.9198	3.68511	0.898086
2015	12	9	21	44	0	-47.9218	3.68309	0.876579
2015	12	9	21	45	0	-47.9237	3.68109	0.892895
2015	12	9	21	47	0	-47.9312	3.6738	0.866939
2015	12	9	21	48	0	-47.933	3.67191	0.881029
2015	12	9	21	50	0	-47.9394	3.66536	0.86768
2015	12	9	21	51	0	-47.9412	3.66345	0.863231
2015	12	9	21	52	0	-47.9432	3.66141	0.849882
2015	12	9	21	54	0	-47.9508	3.65385	0.85359
2015	12	9	21	55	0	-47.9527	3.65184	0.846174
2015	12	9	21	56	0	-47.9546	3.64989	0.851365
2015	12	9	21	58	0	-47.9621	3.64235	0.843949
2015	12	9	21	59	0	-47.9641	3.64032	0.840983
2015	12	9	22	0	0	-47.9661	3.63825	0.832084
2015	12	9	22	2	0	-47.9736	3.63053	0.817993
2015	12	9	22	3	0	-47.9756	3.62843	0.811319
2015	12	9	22	4	0	-47.9776	3.62643	0.790554
2015	12	9	22	6	0	-47.9853	3.6187	0.808353
2015	12	9	22	7	0	-47.9873	3.61673	0.801678
2015	12	9	22	8	0	-47.9893	3.61479	0.774239
2015	12	9	22	10	0	-47.9958	3.60823	0.784622
2015	12	9	22	11	0	-47.9977	3.60618	0.796487
2015	12	9	22	12	0	-47.9997	3.60416	0.79797
2015	12	9	22	14	0	-48.0074	3.59639	0.78833
2015	12	9	22	15	0	-48.0093	3.59444	0.80242
2015	12	9	22	16	0	-48.0113	3.59247	0.800195
2015	12	9	22	18	0	-48.0188	3.58487	0.809836
2015	12	9	22	19	0	-48.0207	3.58287	0.804645
2015	12	9	22	20	0	-48.0226	3.58087	0.800195
2015	12	9	22	22	0	-48.0303	3.57318	0.799453
2015	12	9	22	23	0	-48.0321	3.57131	0.791296
2015	12	9	22	24	0	-48.0341	3.56936	0.789071
2015	12	9	22	25	0	-48.036	3.56735	0.776464
2015	12	9	22	27	0	-48.0434	3.55982	0.78388
2015	12	9	22	28	0	-48.0454	3.55784	0.786846
2015	12	9	22	30	0	-48.052	3.55111	0.78833
2015	12	9	22	31	0	-48.0539	3.54917	0.789071
2015	12	9	22	32	0	-48.0559	3.54717	0.793521
2015	12	9	22	34	0	-48.0635	3.53938	0.792038
2015	12	9	22	35	0	-48.0654	3.53732	0.797229
2015	12	9	22	36	0	-48.0674	3.53534	0.803161
2015	12	9	22	38	0	-48.075	3.52751	0.786846
2015	12	9	22	39	0	-48.077	3.52555	0.808353
2015	12	9	22	40	0	-48.0789	3.52354	0.809836
2015	12	9	22	42	0	-48.0864	3.51602	0.80242
2015	12	9	22	43	0	-48.0884	3.51403	0.807611
2015	12	9	22	44	0	-48.0903	3.51206	0.812061
2015	12	9	22	45	0	-48.0923	3.51002	0.808353
2015	12	9	22	47	0	-48.1	3.50235	0.832084
2015	12	9	22	48	0	-48.102	3.50038	0.835792
2015	12	9	22	50	0	-48.1086	3.49352	0.822443
2015	12	9	22	51	0	-48.1106	3.49153	0.817993
2015	12	9	22	52	0	-48.1125	3.48957	0.815769
2015	12	9	22	54	0	-48.1202	3.4817	0.811319
2015	12	9	22	55	0	-48.1221	3.47984	0.834309
2015	12	9	22	56	0	-48.1239	3.478	0.8395
2015	12	9	22	58	0	-48.1314	3.47037	0.850624
2015	12	9	22	59	0	-48.1334	3.46833	0.852848
2015	12	9	23	0	0	-48.1353	3.46633	0.830601
2015	12	9	23	2	0	-48.143	3.45843	0.835792
2015	12	9	23	3	0	-48.1451	3.45637	0.838758
2015	12	9	23	4	0	-48.1471	3.4543	0.845432
2015	12	9	23	6	0	-48.1549	3.4465	0.870647
2015	12	9	23	7	0	-48.1569	3.44437	0.866197
2015	12	9	23	8	0	-48.1589	3.44231	0.866197
2015	12	9	23	10	0	-48.1656	3.43553	0.870647
2015	12	9	23	11	0	-48.1676	3.43362	0.85804
2015	12	9	23	12	0	-48.1695	3.43169	0.855073
2015	12	9	23	14	0	-48.1772	3.42381	0.852107
2015	12	9	23	15	0	-48.1792	3.42179	0.843208
2015	12	9	23	16	0	-48.1812	3.41974	0.852848
2015	12	9	23	18	0	-48.1886	3.4122	0.872871
2015	12	9	23	19	0	-48.1906	3.41017	0.879546
2015	12	9	23	20	0	-48.1925	3.40818	0.861748
2015	12	9	23	22	0	-48.2	3.40056	0.869905
2015	12	9	23	23	0	-48.2019	3.39865	0.863231
2015	12	9	23	24	0	-48.2038	3.39668	0.871388
2015	12	9	23	26	0	-48.2114	3.38896	0.883995
2015	12	9	23	27	0	-48.2134	3.38689	0.872871
2015	12	9	23	28	0	-48.2153	3.38487	0.883254
2015	12	9	23	30	0	-48.2222	3.37783	0.871388
2015	12	9	23	31	0	-48.2241	3.37583	0.871388
2015	12	9	23	32	0	-48.2261	3.3738	0.851365
2015	12	9	23	34	0	-48.2338	3.36628	0.837275
2015	12	9	23	35	0	-48.2357	3.36425	0.835792
2015	12	9	23	36	0	-48.2377	3.36221	0.817993
2015	12	9	23	38	0	-48.2453	3.35429	0.821701
2015	12	9	23	40	0	-48.2509	3.3489	0.829117
2015	12	9	23	42	0	-48.2562	3.34338	0.814285
2015	12	9	23	44	0	-48.2615	3.33775	0.819477
2015	12	9	23	46	0	-48.2669	3.33242	0.831342
2015	12	9	23	50	0	-48.278	3.32106	0.834309
2015	12	9	23	52	0	-48.2847	3.31419	0.846174
2015	12	9	23	53	0	-48.2868	3.31205	0.86768
2015	12	9	23	54	0	-48.2889	3.30982	0.877321
2015	12	9	23	56	0	-48.2969	3.30187	0.887703
2015	12	9	23	58	0	-48.3009	3.29777	0.891411
2015	12	9	23	59	0	-48.3027	3.29581	0.889187
2015	12	10	0	1	0	-48.3102	3.28821	0.902535
2015	12	10	0	2	0	-48.3121	3.28619	0.905502
2015	12	10	0	3	0	-48.314	3.28411	0.888445
2015	12	10	0	5	0	-48.3217	3.27638	0.920334
2015	12	10	0	6	0	-48.3236	3.27438	0.919592
2015	12	10	0	7	0	-48.3255	3.27245	0.934424
2015	12	10	0	9	0	-48.3329	3.26506	0.930716
2015	12	10	0	10	0	-48.3339	3.26413	0.928491
2015	12	10	0	12	0	-48.3413	3.25645	0.919592
2015	12	10	0	13	0	-48.3432	3.25454	0.924783
2015	12	10	0	14	0	-48.3451	3.25252	0.911434
2015	12	10	0	15	0	-48.347	3.25049	0.915884
2015	12	10	0	17	0	-48.3546	3.24295	0.912176
2015	12	10	0	18	0	-48.3565	3.24105	0.939615
2015	12	10	0	19	0	-48.3585	3.23914	0.935166
2015	12	10	0	21	0	-48.366	3.23136	0.968537
2015	12	10	0	22	0	-48.3679	3.22941	0.966313
2015	12	10	0	23	0	-48.3698	3.22751	0.984852
2015	12	10	0	25	0	-48.3773	3.21963	1.01303
2015	12	10	0	26	0	-48.3793	3.21769	1.03825
2015	12	10	0	27	0	-48.3813	3.21569	1.05901
2015	12	10	0	29	0	-48.3888	3.20804	1.07236
2015	12	10	0	30	0	-48.3898	3.20715	1.07755
2015	12	10	0	32	0	-48.397	3.19962	1.07755
2015	12	10	0	33	0	-48.3989	3.1976	1.09832
2015	12	10	0	34	0	-48.4008	3.19565	1.08274
2015	12	10	0	35	0	-48.4028	3.19367	1.07088
2015	12	10	0	37	0	-48.4102	3.18587	1.08423
2015	12	10	0	38	0	-48.4122	3.18391	1.07459
2015	12	10	0	39	0	-48.4142	3.18193	1.05753
2015	12	10	0	41	0	-48.4217	3.17416	1.06494
2015	12	10	0	42	0	-48.4236	3.17219	1.02638
2015	12	10	0	43	0	-48.4254	3.17029	1.05308
2015	12	10	0	45	0	-48.4327	3.16281	1.05827
2015	12	10	0	46	0	-48.4346	3.16087	1.08274
2015	12	10	0	47	0	-48.4366	3.1589	1.07533
2015	12	10	0	49	0	-48.444	3.15126	1.1087
2015	12	10	0	50	0	-48.445	3.15023	1.11463
2015	12	10	0	52	0	-48.4525	3.1426	1.09535
2015	12	10	0	53	0	-48.4544	3.14056	1.14355
2015	12	10	0	54	0	-48.4563	3.13862	1.12279
2015	12	10	0	55	0	-48.4582	3.13677	1.13985
2015	12	10	0	57	0	-48.4656	3.12913	1.11389
2015	12	10	0	58	0	-48.4675	3.12719	1.10944
2015	12	10	0	59	0	-48.4694	3.12528	1.0998
2015	12	10	1	1	0	-48.4767	3.11797	1.09016
2015	12	10	1	2	0	-48.4786	3.11613	1.11315
2015	12	10	1	3	0	-48.4804	3.11428	1.1176
2015	12	10	1	5	0	-48.4874	3.107	1.12056
2015	12	10	1	6	0	-48.4893	3.1051	1.10722
2015	12	10	1	7	0	-48.4912	3.10317	1.11241
2015	12	10	1	9	0	-48.4984	3.09588	1.11908
2015	12	10	1	10	0	-48.4994	3.0949	1.12279
2015	12	10	1	12	0	-48.5065	3.08752	1.12946
2015	12	10	1	13	0	-48.5084	3.08553	1.12353
2015	12	10	1	14	0	-48.5104	3.08359	1.09609
2015	12	10	1	15	0	-48.5122	3.08174	1.11686
2015	12	10	1	17	0	-48.5194	3.07406	1.09164
2015	12	10	1	18	0	-48.5212	3.0721	1.07533
2015	12	10	1	19	0	-48.5231	3.07017	1.08645
2015	12	10	1	21	0	-48.5306	3.06256	1.07829
2015	12	10	1	22	0	-48.5324	3.06062	1.03528
2015	12	10	1	23	0	-48.5343	3.05869	1.04196
2015	12	10	1	25	0	-48.5416	3.05141	1.02638
2015	12	10	1	26	0	-48.5434	3.04957	1.02193
2015	12	10	1	27	0	-48.5452	3.04767	1.04196
2015	12	10	1	29	0	-48.5522	3.04049	1.016
2015	12	10	1	30	0	-48.5531	3.03958	1.02564
2015	12	10	1	32	0	-48.5601	3.03225	1.02638
2015	12	10	1	33	0	-48.5619	3.03035	1.03009
2015	12	10	1	34	0	-48.5638	3.02847	1.01674
2015	12	10	1	35	0	-48.5656	3.02667	1.00784
2015	12	10	1	37	0	-48.5729	3.01932	1.03825
2015	12	10	1	38	0	-48.5748	3.01738	1.05308
2015	12	10	1	39	0	-48.5767	3.01536	1.07088
2015	12	10	1	41	0	-48.5838	3.00813	1.09164
2015	12	10	1	42	0	-48.5857	3.00625	1.10796
2015	12	10	1	43	0	-48.5874	3.00441	1.11537
2015	12	10	1	45	0	-48.5944	2.99728	1.12056
2015	12	10	1	46	0	-48.5962	2.99548	1.12946
2015	12	10	1	47	0	-48.598	2.99371	1.09387
2015	12	10	1	49	0	-48.6048	2.9865	1.09387
2015	12	10	1	50	0	-48.6057	2.98555	1.12501
2015	12	10	1	52	0	-48.6075	2.98365	1.15023
2015	12	10	1	53	0	-48.6144	2.97647	1.12946
2015	12	10	1	54	0	-48.6163	2.97454	1.11611
2015	12	10	1	55	0	-48.6182	2.97265	1.11018
2015	12	10	1	57	0	-48.6251	2.96589	1.1265
2015	12	10	1	58	0	-48.6269	2.964	1.12205
2015	12	10	1	59	0	-48.6286	2.96212	1.10425
2015	12	10	2	1	0	-48.6357	2.95486	1.13243
2015	12	10	2	2	0	-48.6375	2.95307	1.12946
2015	12	10	2	3	0	-48.6392	2.95127	1.14207
2015	12	10	2	5	0	-48.6462	2.944	1.12576
2015	12	10	2	6	0	-48.648	2.94217	1.13465
2015	12	10	2	7	0	-48.6498	2.94029	1.13243
2015	12	10	2	9	0	-48.6569	2.93292	1.11834
2015	12	10	2	10	0	-48.6578	2.93201	1.14949
2015	12	10	2	12	0	-48.663	2.92683	1.13614
2015	12	10	2	14	0	-48.668	2.92179	1.13317
2015	12	10	2	17	0	-48.6781	2.91103	1.13985
2015	12	10	2	19	0	-48.6832	2.9059	1.1265
2015	12	10	2	23	0	-48.6938	2.89505	1.11908
2015	12	10	2	24	0	-48.6959	2.89302	1.13169
2015	12	10	2	25	0	-48.6979	2.89108	1.12427
2015	12	10	2	26	0	-48.6999	2.88917	1.14726
2015	12	10	2	28	0	-48.7068	2.88175	1.14875
2015	12	10	2	30	0	-48.7104	2.87796	1.13836
2015	12	10	2	32	0	-48.7167	2.87165	1.13836
2015	12	10	2	33	0	-48.7186	2.86979	1.13836
2015	12	10	2	35	0	-48.7257	2.8626	1.10722
2015	12	10	2	36	0	-48.7274	2.86077	1.15171
2015	12	10	2	37	0	-48.7292	2.85888	1.17173
2015	12	10	2	39	0	-48.7309	2.857	1.18953
2015	12	10	2	40	0	-48.738	2.84953	1.19992
2015	12	10	2	41	0	-48.7399	2.84759	1.21623
2015	12	10	2	42	0	-48.7417	2.8457	1.26369
2015	12	10	2	44	0	-48.7486	2.83876	1.25554
2015	12	10	2	45	0	-48.7503	2.83696	1.28742
2015	12	10	2	46	0	-48.7521	2.8351	1.28372
2015	12	10	2	48	0	-48.7592	2.82778	1.30522
2015	12	10	2	49	0	-48.761	2.82607	1.29632
2015	12	10	2	50	0	-48.7627	2.82448	1.29261
2015	12	10	2	52	0	-48.7685	2.81829	1.27111
2015	12	10	2	53	0	-48.7702	2.81647	1.303
2015	12	10	2	55	0	-48.7769	2.80949	1.28668
2015	12	10	2	56	0	-48.7786	2.80771	1.27185
2015	12	10	2	57	0	-48.7803	2.80599	1.29632
2015	12	10	2	59	0	-48.787	2.79896	1.26443
2015	12	10	3	0	0	-48.7889	2.79703	1.2674
2015	12	10	3	1	0	-48.7906	2.79521	1.24738
2015	12	10	3	2	0	-48.7925	2.79341	1.23106
2015	12	10	3	4	0	-48.7996	2.78624	1.237
2015	12	10	3	5	0	-48.8014	2.78443	1.2281
2015	12	10	3	6	0	-48.8032	2.7827	1.20288
2015	12	10	3	8	0	-48.8101	2.77531	1.22661
2015	12	10	3	9	0	-48.812	2.77326	1.22735
2015	12	10	3	10	0	-48.8139	2.77129	1.21994
2015	12	10	3	12	0	-48.8202	2.76485	1.26147
2015	12	10	3	13	0	-48.822	2.763	1.29929
2015	12	10	3	15	0	-48.8293	2.75577	1.28891
2015	12	10	3	16	0	-48.8311	2.75373	1.32005
2015	12	10	3	17	0	-48.833	2.75167	1.35788
2015	12	10	3	18	0	-48.8349	2.74971	1.32376
2015	12	10	3	20	0	-48.8422	2.74206	1.32673
2015	12	10	3	21	0	-48.8441	2.7401	1.33637
2015	12	10	3	22	0	-48.8461	2.73811	1.3208
2015	12	10	3	24	0	-48.8534	2.73065	1.31115
2015	12	10	3	25	0	-48.8553	2.72869	1.31041
2015	12	10	3	26	0	-48.8571	2.72677	1.32228
2015	12	10	3	28	0	-48.8643	2.71945	1.32599
2015	12	10	3	29	0	-48.8661	2.71767	1.33118
2015	12	10	3	30	0	-48.8679	2.71588	1.35639
2015	12	10	3	32	0	-48.874	2.70981	1.35343
2015	12	10	3	33	0	-48.8758	2.70788	1.35639
2015	12	10	3	35	0	-48.8829	2.70006	1.37864
2015	12	10	3	36	0	-48.8848	2.6982	1.41127
2015	12	10	3	37	0	-48.8866	2.69637	1.42833
2015	12	10	3	39	0	-48.8937	2.68876	1.43203
2015	12	10	3	40	0	-48.8955	2.68704	1.39718
2015	12	10	3	41	0	-48.8973	2.68534	1.42833
2015	12	10	3	42	0	-48.899	2.68366	1.42165
2015	12	10	3	44	0	-48.9059	2.6767	1.38531
2015	12	10	3	45	0	-48.9077	2.6747	1.42017
2015	12	10	3	59	0	-48.9446	2.6029	2.04889
2015	12	10	8	1	0	-49.5861	1.96848	1.94881
2015	12	10	11	58	0	-50.2582	1.25965	2.44686
2015	12	10	16	0	0	-50.9414	0.529017	1.04913
2015	12	10	19	56	0	-51.6707	0.00025	0.54853
2015	12	10	21	3	0	-51.9195	-0.000118333	0.631853
2015	12	10	21	4	0	-51.9221	-0.00015	0.637044
2015	12	10	21	5	0	-51.9247	-0.000178333	0.632594
2015	12	10	21	6	0	-51.9273	-0.0002025	0.63037
2015	12	10	21	8	0	-51.9374	-0.000288889	0.645943
2015	12	10	21	9	0	-51.9398	-0.00024	0.636302
2015	12	10	21	10	0	-51.9422	-0.00021	0.631111
2015	12	10	21	12	0	-51.9524	-0.000323333	0.648909
2015	12	10	21	13	0	-51.955	-0.000261111	0.646685
2015	12	10	21	14	0	-51.9575	-0.000211667	0.661517
2015	12	10	21	16	0	-51.9661	-0.000185556	0.671899
2015	12	10	21	17	0	-51.9687	-0.000128889	0.706012
2015	12	10	21	19	0	-51.9787	-0.000233333	0.702304
2015	12	10	21	20	0	-51.9813	-0.000223889	0.675607
2015	12	10	21	21	0	-51.9837	-0.000202222	0.689697
2015	12	10	21	23	0	-51.9937	-0.000121667	0.684506
2015	12	10	21	24	0	-51.9964	-0.000126667	0.683765
2015	12	10	21	25	0	-51.9989	-0.000152222	0.680798
2015	12	10	21	27	0	-52.0089	-0.000167778	0.685989
2015	12	10	21	28	0	-52.0115	-0.0001	0.664483
2015	12	10	21	29	0	-52.0142	-9.11e-05	0.676349
2015	12	10	21	30	0	-52.0168	-0.000138333	0.677832
2015	12	10	21	32	0	-52.0268	-0.000288333	0.674865
2015	12	10	21	33	0	-52.0294	-0.000344444	0.680057
2015	12	10	21	34	0	-52.0319	-0.000375	0.682281
2015	12	10	21	36	0	-52.0408	-0.000240833	0.673382
2015	12	10	21	37	0	-52.0434	-0.000241111	0.687472
2015	12	10	21	39	0	-52.0535	-0.000166667	0.689697
2015	12	10	21	40	0	-52.056	-0.000166667	0.688956
2015	12	10	21	41	0	-52.0587	-0.000163056	0.694888
2015	12	10	21	43	0	-52.0688	-0.000148333	0.702304
2015	12	10	21	44	0	-52.0714	-0.000188889	0.699338
2015	12	10	21	45	0	-52.074	-0.000178889	0.689697
2015	12	10	21	47	0	-52.0844	-8.44e-05	0.691922
2015	12	10	21	48	0	-52.0869	-7.22e-05	0.701563
2015	12	10	21	49	0	-52.0896	-6.06e-05	0.679315
2015	12	10	21	50	0	-52.0922	-5.08e-05	0.685248
2015	12	10	21	52	0	-52.1025	-7.89e-05	0.688956
2015	12	10	21	53	0	-52.105	-9.72e-05	0.678573
2015	12	10	21	54	0	-52.1077	-0.000130278	0.692664
2015	12	10	21	56	0	-52.1166	-0.0002275	0.703788
2015	12	10	21	57	0	-52.1193	-0.000195	0.697113
2015	12	10	21	59	0	-52.1296	-0.000233333	0.708237
2015	12	10	22	0	0	-52.1323	-0.000188889	0.716395
2015	12	10	22	1	0	-52.1349	-0.000135556	0.70008
2015	12	10	22	3	0	-52.1452	-6.81e-05	0.710462
2015	12	10	22	4	0	-52.1477	-4.67e-05	0.708237
2015	12	10	22	5	0	-52.1504	-5.33e-05	0.701563
2015	12	10	22	7	0	-52.153	-0.0001	0.694888
2015	12	10	22	8	0	-52.1634	-0.000244722	0.688956
2015	12	10	22	9	0	-52.166	-0.000262222	0.698596
2015	12	10	22	10	0	-52.1686	-0.000273333	0.704529
2015	12	10	22	12	0	-52.1789	-7.78e-05	0.706754
2015	12	10	22	13	0	-52.1815	-0.000136111	0.716395
2015	12	10	22	14	0	-52.1841	-0.000181389	0.710462
2015	12	10	22	16	0	-52.1932	-0.000305556	0.700821
2015	12	10	22	17	0	-52.1958	-0.000335	0.704529
2015	12	10	22	19	0	-52.2061	-0.000116667	0.699338
2015	12	10	22	20	0	-52.2088	-0.00017	0.68154
2015	12	10	22	21	0	-52.2114	-0.000191389	0.696372
2015	12	10	22	23	0	-52.2218	-0.000188333	0.687472
2015	12	10	22	24	0	-52.2245	-0.00022	0.687472
2015	12	10	22	25	0	-52.2271	-0.000205	0.69118
2015	12	10	22	27	0	-52.2375	-0.000149722	0.668191
2015	12	10	22	28	0	-52.2401	-0.000172222	0.675607
2015	12	10	22	29	0	-52.2428	-0.000189444	0.675607
2015	12	10	22	30	0	-52.2454	-0.0001975	0.683765
2015	12	10	22	32	0	-52.2557	-0.000183333	0.691922
2015	12	10	22	33	0	-52.2583	-0.000205	0.684506
2015	12	10	22	34	0	-52.261	-0.000237778	0.689697
2015	12	10	22	36	0	-52.2699	-0.000177778	0.698596
2015	12	10	22	37	0	-52.2726	-0.000127778	0.691922
2015	12	10	22	39	0	-52.283	-5.5e-05	0.686731
2015	12	10	22	40	0	-52.2857	-7.75e-05	0.694888
2015	12	10	22	41	0	-52.2883	-0.000123333	0.676349
2015	12	10	22	43	0	-52.2987	-0.000171111	0.654842
2015	12	10	22	44	0	-52.3014	-9.47e-05	0.651876
2015	12	10	22	45	0	-52.3041	-5.53e-05	0.643718
2015	12	10	22	47	0	-52.3066	-6.67e-05	0.649651
2015	12	10	22	48	0	-52.317	-0.000160556	0.654842
2015	12	10	22	49	0	-52.3196	-0.000217222	0.665225
2015	12	10	22	50	0	-52.3222	-0.000331667	0.656325
2015	12	10	22	52	0	-52.3326	-0.000116667	0.669674
2015	12	10	22	53	0	-52.3352	-0.000121667	0.660775
2015	12	10	22	54	0	-52.3378	-0.00015	0.668933
2015	12	10	22	56	0	-52.3467	-0.000183333	0.667449
2015	12	10	22	58	0	-52.3541	-0.000192778	0.678573
2015	12	10	23	0	0	-52.3615	-0.000321667	0.671899
2015	12	10	23	2	0	-52.3688	-0.000213333	0.674865
2015	12	10	23	4	0	-52.3762	-7.94e-05	0.687472
2015	12	10	23	9	0	-52.3912	0	0.634078
2015	12	10	23	10	0	-52.4018	-0.000120833	0.652617
2015	12	10	23	11	0	-52.4047	-6.67e-05	0.638527
2015	12	10	23	12	0	-52.4075	-4.78e-05	0.651134
2015	12	10	23	14	0	-52.4182	-0.000183611	0.653359
2015	12	10	23	16	0	-52.4238	-0.000102222	0.632594
2015	12	10	23	18	0	-52.4328	-0.000191667	0.624437
2015	12	10	23	19	0	-52.4355	-0.000201667	0.618504
2015	12	10	23	20	0	-52.4382	-0.000176667	0.619987
2015	12	10	23	22	0	-52.4486	-0.000158333	0.625178
2015	12	10	23	23	0	-52.4513	-0.000131111	0.618504
2015	12	10	23	24	0	-52.454	-0.000139722	0.626662
2015	12	10	23	26	0	-52.4643	-0.000188889	0.615538
2015	12	10	23	27	0	-52.467	-0.000133333	0.622212
2015	12	10	23	28	0	-52.4697	-0.00011	0.622954
2015	12	10	23	30	0	-52.4801	-8.39e-05	0.601447
2015	12	10	23	31	0	-52.4828	-9.47e-05	0.615538
2015	12	10	23	32	0	-52.4854	-0.000148889	0.614054
2015	12	10	23	33	0	-52.4881	-0.000238889	0.62147
2015	12	10	23	35	0	-52.4986	-0.0002125	0.62147
2015	12	10	23	36	0	-52.5013	-0.0001625	0.60738
2015	12	10	23	38	0	-52.5104	-0.000155	0.611088
2015	12	10	23	39	0	-52.5131	-0.000101111	0.608863
2015	12	10	23	40	0	-52.5158	-7.78e-05	0.611088
2015	12	10	23	42	0	-52.5262	-0.000165	0.615538
2015	12	10	23	43	0	-52.5288	-0.000114444	0.619246
2015	12	10	23	44	0	-52.5315	-9.42e-05	0.735676
2015	12	10	23	46	0	-52.542	-9.83e-05	0.68154
2015	12	10	23	47	0	-52.5446	-0.0001	0.68154
2015	12	10	23	48	0	-52.5473	-0.0001125	0.683023
2015	12	10	23	50	0	-52.5579	-0.000235	0.689697
2015	12	10	23	51	0	-52.5606	-0.000233333	0.677832
2015	12	10	23	52	0	-52.5633	-0.0002175	0.692664
2015	12	10	23	53	0	-52.566	-0.000181111	0.683023
2015	12	10	23	55	0	-52.5766	-0.000164444	0.694888
2015	12	10	23	56	0	-52.5792	-0.00019	0.697113
2015	12	10	23	58	0	-52.5885	-0.0001375	0.703046
2015	12	10	23	59	0	-52.5912	-0.000169444	0.687472
2015	12	11	0	0	0	-52.594	-0.000207778	0.690439
2015	12	11	0	2	0	-52.6046	-0.000211944	0.685248
2015	12	11	0	3	0	-52.6073	-0.000198889	0.69563
2015	12	11	0	4	0	-52.6101	-0.00016	0.697855
2015	12	11	0	6	0	-52.6208	-8.5e-05	0.713428
2015	12	11	0	7	0	-52.6234	-5.42e-05	0.708237
2015	12	11	0	8	0	-52.6262	-5.69e-05	0.661517
2015	12	11	0	10	0	-52.6368	-0.000151667	0.693405
2015	12	11	0	11	0	-52.6394	-0.000160833	0.682281
2015	12	11	0	12	0	-52.6421	-0.000155556	0.671899
2015	12	11	0	13	0	-52.6449	-0.000134444	0.684506
2015	12	11	0	15	0	-52.6555	-0.000123611	0.685989
2015	12	11	0	16	0	-52.6582	-0.000106667	0.688214
2015	12	11	0	18	0	-52.6674	-0.000179167	0.69118
2015	12	11	0	19	0	-52.6701	-0.000228889	0.702304
2015	12	11	0	20	0	-52.6729	-0.00026	0.691922
2015	12	11	0	22	0	-52.6834	-0.000211944	0.670416
2015	12	11	0	23	0	-52.686	-0.000217222	0.660033
2015	12	11	0	24	0	-52.6887	-0.000219444	0.668191
2015	12	11	0	26	0	-52.6992	-0.000169444	0.649651
2015	12	11	0	27	0	-52.7019	-0.000132778	0.673382
2015	12	11	0	28	0	-52.7047	-0.000120278	0.674865
2015	12	11	0	30	0	-52.7152	-0.000196667	0.680057
2015	12	11	0	31	0	-52.7179	-0.0002	0.668933
2015	12	11	0	32	0	-52.7207	-0.000185833	0.65855
2015	12	11	0	34	0	-52.7313	-0.000117222	0.64446
2015	12	11	0	35	0	-52.734	-0.000127778	0.64001
2015	12	11	0	36	0	-52.7368	-9.06e-05	0.655584
2015	12	11	0	38	0	-52.7459	-5.69e-05	0.666708
2015	12	11	0	39	0	-52.7487	-7.69e-05	0.672641
2015	12	11	0	40	0	-52.7514	-6.11e-05	0.648909
2015	12	11	0	42	0	-52.7619	-9.22e-05	0.680798
2015	12	11	0	43	0	-52.7645	-7e-05	0.657067
2015	12	11	0	44	0	-52.7673	-3.08e-05	0.668191
2015	12	11	0	46	0	-52.7777	-0.000130556	0.640752
2015	12	11	0	47	0	-52.7805	-0.000115556	0.638527
2015	12	11	0	48	0	-52.7832	-8.92e-05	0.653359
2015	12	11	0	50	0	-52.7938	-9.58e-05	0.640752
2015	12	11	0	51	0	-52.7965	-0.00025	0.640752
2015	12	11	0	52	0	-52.7992	-0.00037	0.639269
2015	12	11	0	54	0	-52.8097	-0.000647222	0.640752
2015	12	11	0	55	0	-52.8125	-0.000672778	0.637786
2015	12	11	0	56	0	-52.8151	-0.000640556	0.659292
2015	12	11	0	58	0	-52.8244	-0.000337778	0.665225
2015	12	11	0	59	0	-52.8271	-0.000286667	0.664483
2015	12	11	1	0	0	-52.8299	-0.000256667	0.679315
2015	12	11	1	2	0	-52.8404	-6.08e-05	0.667449
2015	12	11	1	3	0	-52.8431	-6.61e-05	0.654842
2015	12	11	1	4	0	-52.8458	-8.33e-05	0.65855
2015	12	11	1	6	0	-52.8563	-0.000176667	0.682281
2015	12	11	1	7	0	-52.859	-0.000155	0.667449
2015	12	11	1	8	0	-52.8617	-0.000129167	0.657067
2015	12	11	1	10	0	-52.8723	-0.000166667	0.64446
2015	12	11	1	11	0	-52.875	-0.00023	0.637786
2015	12	11	1	12	0	-52.8778	-0.000255556	0.645943
2015	12	11	1	13	0	-52.8805	-0.000233333	0.646685
2015	12	11	1	15	0	-52.8911	-0.000206944	0.637044
2015	12	11	1	16	0	-52.8938	-0.000143333	0.648909
2015	12	11	1	18	0	-52.9031	-4.67e-05	0.660033
2015	12	11	1	19	0	-52.9059	-4.06e-05	0.651134
2015	12	11	1	20	0	-52.9086	-5.58e-05	0.665966
2015	12	11	1	22	0	-52.9194	1.39e-06	0.67709
2015	12	11	1	23	0	-52.9221	8.06e-06	0.687472
2015	12	11	1	24	0	-52.9248	-2.67e-05	0.687472
2015	12	11	1	26	0	-52.9354	-9.5e-05	0.69118
2015	12	11	1	27	0	-52.9381	-0.000129167	0.705271
2015	12	11	1	28	0	-52.9409	-0.000140556	0.705271
2015	12	11	1	30	0	-52.9485	-7.28e-05	0.722328
2015	12	11	1	32	0	-52.956	-6.67e-05	0.719361
2015	12	11	1	35	0	-52.9714	-5.08e-05	0.719361
2015	12	11	1	37	0	-52.9788	-9.61e-05	0.740867
2015	12	11	1	41	0	-52.9927	3.33e-05	0.735676
2015	12	11	1	42	0	-52.9956	1.39e-05	0.75125
2015	12	11	1	44	0	-53.0064	-0.00013	0.756441
2015	12	11	1	45	0	-53.0094	-9e-05	0.763115
2015	12	11	1	46	0	-53.0122	-0.000103333	0.745317
2015	12	11	1	49	0	-53.026	-0.000104444	0.729002
2015	12	11	1	50	0	-53.0287	-9.11e-05	0.747542
2015	12	11	1	51	0	-53.0314	-8.33e-05	0.729002
2015	12	11	1	53	0	-53.0419	-8.33e-05	0.724552
2015	12	11	1	54	0	-53.0446	-9.36e-05	0.7468
2015	12	11	1	55	0	-53.0473	-7.89e-05	0.755699
2015	12	11	1	57	0	-53.05	-3.33e-05	0.745317
2015	12	11	1	58	0	-53.0591	2.17e-05	0.71862
2015	12	11	1	59	0	-53.0618	-3.89e-06	0.708237
2015	12	11	2	1	0	-53.0723	-4.89e-05	0.708979
2015	12	11	2	2	0	-53.0749	-1.39e-05	0.726777
2015	12	11	2	3	0	-53.0776	-6.25e-05	0.71862
2015	12	11	2	5	0	-53.088	-0.000296667	0.731968
2015	12	11	2	6	0	-53.0907	-0.000308333	0.708237
2015	12	11	2	7	0	-53.0933	-0.000363889	0.705271
2015	12	11	2	9	0	-53.1038	-0.000487222	0.686731
2015	12	11	2	10	0	-53.1065	-0.000407778	0.678573
2015	12	11	2	11	0	-53.1092	-0.000323333	0.703788
2015	12	11	2	13	0	-53.1197	-0.000295833	0.705271
2015	12	11	2	14	0	-53.1224	-0.000278889	0.721586
2015	12	11	2	15	0	-53.125	-0.000250833	0.707496
2015	12	11	2	16	0	-53.1277	-0.000216667	0.720844
2015	12	11	2	18	0	-53.1369	-0.000154167	0.706012
2015	12	11	2	19	0	-53.1396	-9.58e-05	0.679315
2015	12	11	2	21	0	-53.15	-0.000268889	0.654842
2015	12	11	2	22	0	-53.1528	-0.000285556	0.674865
2015	12	11	2	23	0	-53.1554	-0.000276389	0.651876
2015	12	11	2	26	0	-53.1687	-0.000306944	0.645943
2015	12	11	2	27	0	-53.1714	-0.00025	0.663741
2015	12	11	2	29	0	-53.1819	-0.00015	0.636302
2015	12	11	2	30	0	-53.1845	-0.000208333	0.653359
2015	12	11	2	31	0	-53.1872	-0.000254444	0.636302
2015	12	11	2	33	0	-53.1978	-0.00033	0.63037
2015	12	11	2	34	0	-53.2004	-0.000323333	0.632594
2015	12	11	2	35	0	-53.203	-0.000288333	0.662258
2015	12	11	2	37	0	-53.2136	-0.000198333	0.673382
2015	12	11	2	38	0	-53.2149	-0.000184167	0.694888
2015	12	11	2	39	0	-53.2176	-0.000150833	0.665966
2015	12	11	2	41	0	-53.228	-0.00026	0.645943
2015	12	11	2	42	0	-53.2308	-0.000256667	0.634819
2015	12	11	2	43	0	-53.2335	-0.000265278	0.624437
2015	12	11	2	45	0	-53.2442	-9.06e-05	0.616279
2015	12	11	2	46	0	-53.2469	-9.89e-05	0.614796
2015	12	11	2	47	0	-53.2497	-0.000113889	0.628145
2015	12	11	2	49	0	-53.2603	-0.000116667	0.605897
2015	12	11	2	50	0	-53.263	-0.000134444	0.622954
2015	12	11	2	51	0	-53.2657	-0.000165556	0.614054
2015	12	11	2	53	0	-53.2764	-0.000214444	0.608863
2015	12	11	2	54	0	-53.279	-0.000278333	0.613313
2015	12	11	2	55	0	-53.2818	-0.000316667	0.619246
2015	12	11	2	57	0	-53.2844	-0.000316667	0.637786
2015	12	11	2	58	0	-53.2937	-0.000166667	0.622954
2015	12	11	2	59	0	-53.2964	-0.000166667	0.605155
2015	12	11	3	1	0	-53.3069	-0.000153333	0.623695
2015	12	11	3	2	0	-53.3096	-0.000152778	0.603672
2015	12	11	3	3	0	-53.3123	-0.000133333	0.598481
2015	12	11	3	5	0	-53.3228	-5e-05	0.59329
2015	12	11	3	6	0	-53.3256	-3.33e-05	0.597739
2015	12	11	3	7	0	-53.3283	-4.56e-05	0.611088
2015	12	11	3	9	0	-53.339	6.86e-05	0.629628
2015	12	11	3	10	0	-53.3416	6.67e-05	0.627403
2015	12	11	3	11	0	-53.3442	7.92e-05	0.625178
2015	12	11	3	13	0	-53.3546	4.86e-05	0.613313
2015	12	11	3	14	0	-53.3573	5e-05	0.604414
2015	12	11	3	15	0	-53.36	5e-05	0.617762
2015	12	11	3	17	0	-53.3705	0.000198889	0.62592
2015	12	11	3	18	0	-53.3719	0.000188889	0.631111
2015	12	11	3	19	0	-53.3745	0.000164167	0.623695
2015	12	11	3	21	0	-53.3852	4.28e-05	0.638527
2015	12	11	3	22	0	-53.3878	-0.0001	0.649651
2015	12	11	3	23	0	-53.3906	-0.00032	0.624437
2015	12	11	3	25	0	-53.4012	-0.000523889	0.635561
2015	12	11	3	26	0	-53.404	-0.000476389	0.637786
2015	12	11	3	27	0	-53.4068	-0.000422222	0.631111
2015	12	11	3	29	0	-53.4175	-0.000383333	0.600706
2015	12	11	3	30	0	-53.4202	-0.0002825	0.619987
2015	12	11	3	31	0	-53.423	-0.000179167	0.631853
2015	12	11	4	0	0	-53.5363	-0.00025	0.506924
2015	12	11	7	59	0	-54.4771	0.0002	1.18548
2015	12	11	12	0	0	-55.4132	-5e-05	1.24717
2015	12	11	15	59	0	-56.2555	-0.0268833	0.895798
2015	12	11	20	0	0	-56.8092	-0.0277167	1.74189
2015	12	11	21	37	0	-57.1576	0.084215	0.884737
2015	12	11	21	38	0	-57.1597	0.0831025	0.895119
2015	12	11	21	39	0	-57.1618	0.0817278	0.896603
2015	12	11	21	41	0	-57.17	0.0765006	0.920334
2015	12	11	21	42	0	-57.1719	0.0754156	0.944806
2015	12	11	21	43	0	-57.1737	0.0744083	0.94629
2015	12	11	21	45	0	-57.1804	0.0708025	0.963346
2015	12	11	21	46	0	-57.1821	0.0698483	1.00339
2015	12	11	21	47	0	-57.1838	0.069	1.03899
2015	12	11	21	49	0	-57.1895	0.0671639	0.99301
2015	12	11	21	50	0	-57.1908	0.0659878	1.02861
2015	12	11	21	52	0	-57.1962	0.0601417	1.04121
2015	12	11	21	53	0	-57.1982	0.0592867	1.0553
2015	12	11	21	54	0	-57.2003	0.05819	1.07236
2015	12	11	21	55	0	-57.2024	0.0568389	1.02712
2015	12	11	21	57	0	-57.2104	0.0507461	1.08793
2015	12	11	21	58	0	-57.2126	0.0495125	1.1443
2015	12	11	21	59	0	-57.2147	0.0482967	1.14504
2015	12	11	22	1	0	-57.2233	0.04443	1.1443
2015	12	11	22	2	0	-57.2256	0.0434167	1.08868
2015	12	11	22	3	0	-57.2277	0.0424403	1.1087
2015	12	11	22	5	0	-57.2364	0.03901	1.11018
2015	12	11	22	6	0	-57.2387	0.0393083	1.02638
2015	12	11	22	7	0	-57.2408	0.0400375	1.08868
2015	12	11	22	9	0	-57.2476	0.04389	1.05011
2015	12	11	22	10	0	-57.2496	0.0447519	0.542861
2015	12	11	22	12	0	-57.2572	0.0489875	1.01007
2015	12	11	22	13	0	-57.2591	0.0501833	1.02935
2015	12	11	22	14	0	-57.2611	0.0513617	1.0249
2015	12	11	22	15	0	-57.263	0.0525267	1.02712
2015	12	11	22	17	0	-57.2708	0.05728	1.0338
2015	12	11	22	18	0	-57.2726	0.0575806	1.01007
2015	12	11	22	19	0	-57.2743	0.0570303	1.05456
2015	12	11	22	21	0	-57.2802	0.0497267	1.01971
2015	12	11	22	22	0	-57.2821	0.0482333	1.01526
2015	12	11	22	23	0	-57.284	0.0468778	0.911434
2015	12	11	22	25	0	-57.2917	0.0437589	0.922558
2015	12	11	22	26	0	-57.2935	0.0423467	0.933682
2015	12	11	22	27	0	-57.2951	0.0404389	0.949997
2015	12	11	22	29	0	-57.2999	0.03189	0.915884
2015	12	11	22	30	0	-57.3014	0.029275	0.884737
2015	12	11	22	32	0	-57.308	0.0215167	0.896603
2015	12	11	22	33	0	-57.3099	0.0206633	0.906243
2015	12	11	22	34	0	-57.3118	0.0197089	0.877321
2015	12	11	22	35	0	-57.3136	0.01855	0.892895
2015	12	11	22	37	0	-57.3202	0.0110792	0.857298
2015	12	11	22	38	0	-57.322	0.00958667	0.84914
2015	12	11	22	39	0	-57.3238	0.00848667	0.840241
2015	12	11	22	41	0	-57.3312	0.00561389	0.837275
2015	12	11	22	42	0	-57.3333	0.00558667	0.834309
2015	12	11	22	43	0	-57.3354	0.00577722	0.848399
2015	12	11	22	45	0	-57.3435	0.00645333	0.85359
2015	12	11	22	47	0	-57.3491	0.00526083	0.855815
2015	12	11	22	49	0	-57.3545	0.00250444	0.861006
2015	12	11	22	51	0	-57.3586	0.00254583	0.89067
2015	12	11	22	53	0	-57.3637	0.00262833	0.935166
2015	12	11	22	57	0	-57.3747	-0.000636667	0.935907
2015	12	11	22	59	0	-57.3827	-0.00322	0.942582
2015	12	11	23	0	0	-57.3848	-0.00330111	0.947773
2015	12	11	23	1	0	-57.387	-0.00332444	0.940357
2015	12	11	23	3	0	-57.3892	-0.0033	0.931458
2015	12	11	23	5	0	-57.399	-0.00331556	0.95593
2015	12	11	23	6	0	-57.4009	-0.00336083	0.947773
2015	12	11	23	8	0	-57.4082	-0.00494167	0.961863
2015	12	11	23	9	0	-57.409	-0.0052425	0.940357
2015	12	11	23	11	0	-57.4166	-0.008195	0.967796
2015	12	11	23	12	0	-57.4184	-0.00926222	0.968537
2015	12	11	23	13	0	-57.4203	-0.0101839	0.994493
2015	12	11	23	15	0	-57.4275	-0.00879444	0.97892
2015	12	11	23	16	0	-57.4293	-0.00779944	0.972245
2015	12	11	23	17	0	-57.4311	-0.006835	0.967054
2015	12	11	23	19	0	-57.4329	-0.00586667	0.921817
2015	12	11	23	20	0	-57.4392	-0.000811389	0.936649
2015	12	11	23	21	0	-57.4407	0.000295833	0.961121
2015	12	11	23	22	0	-57.4423	0.00103667	0.913659
2015	12	11	23	24	0	-57.449	-0.000101111	0.919592
2015	12	11	23	25	0	-57.4508	-0.000116667	0.888445
2015	12	11	23	26	0	-57.4526	-0.000131667	0.888445
2015	12	11	23	28	0	-57.4599	-0.000409167	0.905502
2015	12	11	23	29	0	-57.4608	-0.000321944	0.875096
2015	12	11	23	31	0	-57.468	0.00224111	0.542861
2015	12	11	23	32	0	-57.4699	0.00323833	6.156
2015	12	11	23	33	0	-57.4718	0.0040125	1.06124
2015	12	11	23	35	0	-57.4797	0.00426917	0.85804
2015	12	11	23	36	0	-57.4817	0.00424556	0.780914
2015	12	11	23	37	0	-57.4837	0.00423333	0.932199
2015	12	11	23	38	0	-57.4857	0.00423556	0.944065
2015	12	11	23	40	0	-57.4933	0.0051225	0.984852
2015	12	11	23	41	0	-57.4951	0.00541	1.01748
2015	12	11	23	42	0	-57.4969	0.00569	1.04492
2015	12	11	23	44	0	-57.5043	0.00679306	1.01822
2015	12	11	23	45	0	-57.5061	0.00702028	0.967796
2015	12	11	23	46	0	-57.5078	0.00723889	0.962605
2015	12	11	23	48	0	-57.5148	0.00729444	0.982628
2015	12	11	23	49	0	-57.5166	0.00674	0.978178
2015	12	11	23	51	0	-57.523	0.00475167	0.963346
2015	12	11	23	52	0	-57.5249	0.00443333	0.932199
2015	12	11	23	53	0	-57.5268	0.00429028	0.961863
2015	12	11	23	55	0	-57.5343	0.00426944	1.03676
2015	12	11	23	56	0	-57.5363	0.00424444	1.02267
2015	12	11	23	57	0	-57.5382	0.00423333	1.03899
2015	12	11	23	58	0	-57.5402	0.00423167	1.03009
2015	12	12	0	0	0	-57.5477	0.00472778	1.0642
2015	12	12	0	1	0	-57.5496	0.00525167	0.990044
2015	12	12	0	2	0	-57.5515	0.00582667	1.00636
2015	12	12	0	4	0	-57.5589	0.00756444	0.967054
2015	12	12	0	5	0	-57.5608	0.00779167	0.917367
2015	12	12	0	6	0	-57.5626	0.00795278	0.957413
2015	12	12	0	8	0	-57.5701	0.00832778	0.938132
2015	12	12	0	9	0	-57.572	0.00835917	0.964088
2015	12	12	0	11	0	-57.5783	0.007705	1.00265
2015	12	12	0	12	0	-57.58	0.00652778	1.00265
2015	12	12	0	13	0	-57.5818	0.00509833	1.01822
2015	12	12	0	15	0	-57.5882	-0.00133222	1.06272
2015	12	12	0	16	0	-57.5898	-0.00323889	1.07829
2015	12	12	0	17	0	-57.5914	-0.00461667	1.11982
2015	12	12	0	19	0	-57.593	-0.00555	1.11389
2015	12	12	0	20	0	-57.6001	-0.00597222	1.12427
2015	12	12	0	21	0	-57.6019	-0.00631222	1.13688
2015	12	12	0	22	0	-57.6039	-0.00667333	1.28817
2015	12	12	0	24	0	-57.6115	-0.00890833	1.18805
2015	12	12	0	25	0	-57.6135	-0.00972722	1.19917
2015	12	12	0	26	0	-57.6155	-0.0105678	1.21475
2015	12	12	0	28	0	-57.6228	-0.0144939	1.21178
2015	12	12	0	29	0	-57.6245	-0.0152456	1.19621
2015	12	12	0	31	0	-57.6294	-0.0113925	1.16951
2015	12	12	0	32	0	-57.6307	-0.00898833	1.24367
2015	12	12	0	33	0	-57.6318	-0.00658222	1.26221
2015	12	12	0	35	0	-57.6376	-0.000926667	1.23996
2015	12	12	0	36	0	-57.6395	-0.000893611	1.22884
2015	12	12	0	37	0	-57.6414	-0.000905278	1.21326
2015	12	12	0	39	0	-57.6433	-0.000916667	1.26592
2015	12	12	0	40	0	-57.6509	-0.000795	1.14578
2015	12	12	0	41	0	-57.6529	-0.000363333	1.16877
2015	12	12	0	42	0	-57.6549	0.000305556	1.10277
2015	12	12	0	44	0	-57.6622	0.00374028	1.10277
2015	12	12	0	45	0	-57.6641	0.00498556	1.09164
2015	12	12	0	46	0	-57.666	0.00632778	1.05234
2015	12	12	0	48	0	-57.6732	0.011275	1.06569
2015	12	12	0	49	0	-57.6751	0.0123475	1.08052
2015	12	12	0	51	0	-57.6816	0.0143056	1.16061
2015	12	12	0	52	0	-57.6836	0.0148306	1.14207
2015	12	12	0	53	0	-57.6856	0.0153389	1.11982
2015	12	12	0	55	0	-57.693	0.0139431	1.14059
2015	12	12	0	56	0	-57.6945	0.0121278	1.08348
2015	12	12	0	57	0	-57.6961	0.01009	1.09387
2015	12	12	0	58	0	-57.6975	0.00785667	1.082
2015	12	12	1	0	0	-57.7034	-0.000967222	1.0464
2015	12	12	1	1	0	-57.7051	-0.00300139	1.05753
2015	12	12	1	2	0	-57.7067	-0.00468	1.05308
2015	12	12	1	4	0	-57.7141	-0.00721667	1.01526
2015	12	12	1	5	0	-57.716	-0.00820833	1.03083
2015	12	12	1	6	0	-57.7179	-0.00927972	1.01303
2015	12	12	1	8	0	-57.725	-0.0141786	1.03454
2015	12	12	1	9	0	-57.7267	-0.0149056	1.06791
2015	12	12	1	11	0	-57.7328	-0.0141569	1.0516
2015	12	12	1	12	0	-57.7347	-0.01337	1.08423
2015	12	12	1	13	0	-57.7365	-0.0123683	1.15764
2015	12	12	1	15	0	-57.7432	-0.00875361	1.12501
2015	12	12	1	16	0	-57.7449	-0.00741111	1.15913
2015	12	12	1	17	0	-57.7466	-0.00598889	1.12798
2015	12	12	1	19	0	-57.7514	-0.0031375	1.09609
2015	12	12	1	21	0	-57.7566	-0.0037525	1.11241
2015	12	12	1	23	0	-57.7618	-0.00437	1.18286
2015	12	12	1	26	0	-57.7713	0.001295	1.09758
2015	12	12	1	30	0	-57.7794	0.00797111	1.03157
2015	12	12	1	31	0	-57.7804	0.00811778	1.00339
2015	12	12	1	32	0	-57.7825	0.00835194	1.00488
2015	12	12	1	34	0	-57.7906	0.00853333	0.947773
2015	12	12	1	35	0	-57.7928	0.00838694	0.912176
2015	12	12	1	38	0	-57.8019	0.00350444	0.871388
2015	12	12	1	39	0	-57.8036	0.00232833	0.842466
2015	12	12	1	40	0	-57.8054	0.001675	0.863972
2015	12	12	1	41	0	-57.8071	0.00157056	0.82096
2015	12	12	1	43	0	-57.8143	0.00171	0.815027
2015	12	12	1	44	0	-57.8161	0.00205333	0.814285
2015	12	12	1	45	0	-57.8178	0.00254139	0.804645
2015	12	12	1	47	0	-57.8242	0.00211	0.821701
2015	12	12	1	48	0	-57.8259	0.00200806	0.875838
2015	12	12	1	49	0	-57.8277	0.00195556	0.85804
2015	12	12	1	51	0	-57.8339	0.000478056	0.907727
2015	12	12	1	52	0	-57.8358	-8.33e-05	0.78833
2015	12	12	1	54	0	-57.843	-0.00101111	0.768306
2015	12	12	1	55	0	-57.8447	0.000105556	0.791296
2015	12	12	1	56	0	-57.8464	0.001425	0.757924
2015	12	12	1	58	0	-57.8533	0.0068675	0.747542
2015	12	12	1	59	0	-57.8551	0.00817	0.731968
2015	12	12	2	0	0	-57.8569	0.00912	0.703046
2015	12	12	2	1	0	-57.8588	0.00966611	0.707496
2015	12	12	2	3	0	-57.8661	0.00698833	0.697113
2015	12	12	2	4	0	-57.868	0.00565	0.692664
2015	12	12	2	5	0	-57.8699	0.00426	0.717878
2015	12	12	2	7	0	-57.8772	-0.00075	0.701563
2015	12	12	2	8	0	-57.8789	-0.00167194	0.663
2015	12	12	2	9	0	-57.8805	-0.00245833	0.674124
2015	12	12	2	11	0	-57.8851	-0.00440833	0.671899
2015	12	12	2	12	0	-57.8866	-0.00451333	0.668933
2015	12	12	2	14	0	-57.8925	-0.00215472	0.707496
[truncated: 8,044 more rows]

## Sheet: uw_par
year	month	day	hour	minute	second	lat	lon	PAR
2015	12	5	2	44	0	18.4287	-33.9021	0.01
2015	12	5	2	45	0	18.4299	-33.9016	0.01
2015	12	5	2	46	0	18.4311	-33.9011	0.02
2015	12	5	2	47	0	18.4324	-33.9005	0.02
2015	12	5	2	48	0	18.4338	-33.8999	0.02
2015	12	5	2	49	0	18.4355	-33.8992	0.01
2015	12	5	2	50	0	18.4369	-33.8982	0.02
2015	12	5	2	51	0	18.4375	-33.8967	0.04
2015	12	5	2	52	0	18.4372	-33.8952	0.05
2015	12	5	2	53	0	18.4365	-33.8937	0.05
2015	12	5	2	54	0	18.4358	-33.8922	0.07
2015	12	5	2	55	0	18.4352	-33.8906	0.1
2015	12	5	2	56	0	18.4346	-33.8889	0.11
2015	12	5	2	57	0	18.434	-33.8872	0.14
2015	12	5	2	58	0	18.4335	-33.8855	0.17
2015	12	5	2	59	0	18.433	-33.8839	0.21
2015	12	5	3	0	0	18.4326	-33.8821	0.27
2015	12	5	3	1	0	18.4318	-33.8801	0.33
2015	12	5	3	2	0	18.4311	-33.878	0.41
2015	12	5	3	3	0	18.4304	-33.8759	0.5
2015	12	5	3	4	0	18.4295	-33.8733	0.62
2015	12	5	3	5	0	18.4285	-33.8705	0.75
2015	12	5	3	6	0	18.4274	-33.8672	0.92
2015	12	5	3	7	0	18.4263	-33.8641	1.06
2015	12	5	3	8	0	18.4242	-33.8618	1.1
2015	12	5	3	9	0	18.421	-33.8614	1.29
2015	12	5	3	10	0	18.4176	-33.8616	1.53
2015	12	5	3	11	0	18.414	-33.8616	1.81
2015	12	5	3	12	0	18.4104	-33.8617	2.16
2015	12	5	3	13	0	18.4065	-33.8618	2.61
2015	12	5	3	14	0	18.4026	-33.862	3.2
2015	12	5	3	15	0	18.3986	-33.8621	3.77
2015	12	5	3	16	0	18.3946	-33.8622	4.42
2015	12	5	3	17	0	18.3906	-33.8623	5.22
2015	12	5	3	18	0	18.3865	-33.8624	6.21
2015	12	5	3	19	0	18.3823	-33.8625	7.25
2015	12	5	3	20	0	18.378	-33.8626	8.43
2015	12	5	3	21	0	18.3739	-33.8627	9.8
2015	12	5	3	22	0	18.3699	-33.8628	11.16
2015	12	5	3	23	0	18.3659	-33.8629	12.64
2015	12	5	3	24	0	18.3619	-33.8629	14.26
2015	12	5	3	25	0	18.3579	-33.8631	15.89
2015	12	5	3	26	0	18.3539	-33.8632	17.69
2015	12	5	3	27	0	18.3498	-33.8633	19.49
2015	12	5	3	28	0	18.3458	-33.8634	21.55
2015	12	5	3	29	0	18.3417	-33.8635	23.84
2015	12	5	3	30	0	18.3377	-33.8636	26.25
2015	12	5	3	31	0	18.3336	-33.8638	28.8
2015	12	5	3	32	0	18.3296	-33.8639	31.44
2015	12	5	3	33	0	18.3256	-33.8641	34.58
2015	12	5	3	34	0	18.3215	-33.8642	41.13
2015	12	5	3	35	0	18.3179	-33.8651	40.11
2015	12	5	3	36	0	18.3158	-33.8676	42.3
2015	12	5	3	37	0	18.3138	-33.8704	45.73
2015	12	5	3	38	0	18.3116	-33.8733	48.45
2015	12	5	3	39	0	18.3094	-33.8763	50.65
2015	12	5	3	40	0	18.3071	-33.8792	53.47
2015	12	5	3	41	0	18.3048	-33.8821	56.59
2015	12	5	3	42	0	18.3026	-33.885	59.86
2015	12	5	3	43	0	18.3003	-33.8879	62.97
2015	12	5	3	44	0	18.298	-33.8907	64.93
2015	12	5	3	45	0	18.2958	-33.8937	65.79
2015	12	5	3	46	0	18.2935	-33.8966	69.72
2015	12	5	3	47	0	18.2909	-33.899	96.65
2015	12	5	3	48	0	18.2878	-33.9011	94.17
2015	12	5	3	49	0	18.2851	-33.9035	81.74
2015	12	5	3	50	0	18.2831	-33.9064	85.01
2015	12	5	3	51	0	18.2812	-33.9094	88.46
2015	12	5	3	52	0	18.2791	-33.9124	95.33
2015	12	5	3	53	0	18.2771	-33.9153	102.51
2015	12	5	3	54	0	18.275	-33.9183	107.62
2015	12	5	3	55	0	18.2729	-33.9213	112.9
2015	12	5	3	56	0	18.2708	-33.9243	117.16
2015	12	5	3	57	0	18.2687	-33.9273	121.18
2015	12	5	3	58	0	18.2666	-33.9302	124.67
2015	12	5	3	59	0	18.2645	-33.9332	128.42
2015	12	5	4	0	0	18.2624	-33.9362	132.17
2015	12	5	4	1	0	18.2603	-33.9392	134.53
2015	12	5	4	2	0	18.2583	-33.9422	135.98
2015	12	5	4	3	0	18.2562	-33.9452	138.67
2015	12	5	4	4	0	18.254	-33.9482	146
2015	12	5	4	5	0	18.252	-33.9512	149.04
2015	12	5	4	6	0	18.2499	-33.9542	148.68
2015	12	5	4	7	0	18.2479	-33.9571	157.09
2015	12	5	4	8	0	18.2459	-33.9601	163.88
2015	12	5	4	9	0	18.2437	-33.9632	168.26
2015	12	5	4	10	0	18.2417	-33.9662	172.06
2015	12	5	4	11	0	18.2396	-33.9692	175.31
2015	12	5	4	12	0	18.2375	-33.9722	178.59
2015	12	5	4	13	0	18.2355	-33.9751	181.93
2015	12	5	4	14	0	18.2333	-33.9781	185.72
2015	12	5	4	15	0	18.2312	-33.9811	189.3
2015	12	5	4	16	0	18.2292	-33.984	192.87
2015	12	5	4	17	0	18.2272	-33.9871	195.4
2015	12	5	4	18	0	18.2251	-33.99	200.24
2015	12	5	4	19	0	18.223	-33.993	205.13
2015	12	5	4	20	0	18.2209	-33.9958	209.45
2015	12	5	4	21	0	18.2188	-33.9988	212.91
2015	12	5	4	22	0	18.2167	-34.0017	216.13
2015	12	5	4	23	0	18.2146	-34.0046	217.14
2015	12	5	4	24	0	18.2125	-34.0076	215.45
2015	12	5	4	25	0	18.2103	-34.0105	219.79
2015	12	5	4	26	0	18.2079	-34.0133	236.11
2015	12	5	4	27	0	18.2055	-34.0161	244.23
2015	12	5	4	28	0	18.2032	-34.0188	250.21
2015	12	5	4	29	0	18.2007	-34.0216	429.63
2015	12	5	4	30	0	18.1982	-34.0243	794.41
2015	12	5	4	31	0	18.1952	-34.0266	362.9
2015	12	5	4	32	0	18.1919	-34.0286	274.48
2015	12	5	4	33	0	18.1883	-34.0305	280.36
2015	12	5	4	34	0	18.1849	-34.0323	284.19
2015	12	5	4	35	0	18.1811	-34.0341	286.82
2015	12	5	4	36	0	18.1776	-34.036	293.15
2015	12	5	4	37	0	18.1741	-34.0378	396.5
2015	12	5	4	38	0	18.1705	-34.0397	446.67
2015	12	5	4	39	0	18.1667	-34.0416	415.35
2015	12	5	4	40	0	18.163	-34.0436	514.85
2015	12	5	4	41	0	18.1593	-34.0456	753.06
2015	12	5	4	42	0	18.1557	-34.0475	955.95
2015	12	5	4	43	0	18.152	-34.0495	976.85
2015	12	5	4	44	0	18.1484	-34.0514	961.01
2015	12	5	4	45	0	18.1447	-34.0534	1100.55
2015	12	5	4	46	0	18.141	-34.0554	1126.1
2015	12	5	4	47	0	18.1373	-34.0575	962.76
2015	12	5	4	48	0	18.1338	-34.0594	975.88
2015	12	5	4	49	0	18.1303	-34.0613	808.67
2015	12	5	4	50	0	18.1278	-34.0628	929.62
2015	12	5	4	51	0	18.1257	-34.0641	1156.79
2015	12	5	4	52	0	18.1238	-34.0654	1317.21
2015	12	5	4	53	0	18.1216	-34.0666	1290.91
2015	12	5	4	54	0	18.119	-34.0678	1293.31
2015	12	5	4	55	0	18.116	-34.0692	1279.64
2015	12	5	4	56	0	18.1129	-34.0705	506.06
2015	12	5	4	57	0	18.1094	-34.0716	837.58
2015	12	5	4	58	0	18.1061	-34.0727	1050.48
2015	12	5	4	59	0	18.1031	-34.0743	736.08
2015	12	5	5	0	0	18.1003	-34.0763	787.34
2015	12	5	5	1	0	18.0976	-34.0782	1011.19
2015	12	5	5	2	0	18.0947	-34.0801	1000.02
2015	12	5	5	3	0	18.092	-34.0819	1259.66
2015	12	5	5	4	0	18.0891	-34.0838	1255.47
2015	12	5	5	5	0	18.0863	-34.0856	1395.64
2015	12	5	5	6	0	18.0834	-34.0875	1461.82
2015	12	5	5	7	0	18.0805	-34.0894	1499.9
2015	12	5	5	8	0	18.0777	-34.0912	1508.23
2015	12	5	5	9	0	18.0749	-34.093	1464.31
2015	12	5	5	10	0	18.072	-34.0949	1411.6
2015	12	5	5	11	0	18.0692	-34.0968	1357.16
2015	12	5	5	12	0	18.0664	-34.0987	1277.79
2015	12	5	5	13	0	18.0635	-34.1005	1040.33
2015	12	5	5	14	0	18.0607	-34.1024	792.79
2015	12	5	5	15	0	18.0578	-34.1043	1153.69
2015	12	5	5	16	0	18.055	-34.1061	1027.35
2015	12	5	5	17	0	18.052	-34.108	949.9
2015	12	5	5	18	0	18.0492	-34.1099	1040.39
2015	12	5	5	19	0	18.0463	-34.1118	781.24
2015	12	5	5	20	0	18.0433	-34.1137	811.84
2015	12	5	5	21	0	18.0404	-34.1155	951.83
2015	12	5	5	22	0	18.0374	-34.1175	1040.36
2015	12	5	5	23	0	18.0346	-34.1193	1058.42
2015	12	5	5	24	0	18.0317	-34.1212	1274.7
2015	12	5	5	25	0	18.0288	-34.1231	1210.3
2015	12	5	5	26	0	18.0258	-34.1249	1288.05
2015	12	5	5	27	0	18.0229	-34.1268	1171.86
2015	12	5	5	28	0	18.0203	-34.1288	1225.11
2015	12	5	5	29	0	18.0191	-34.1312	1413.13
2015	12	5	5	30	0	18.0197	-34.1336	1596.01
2015	12	5	5	31	0	18.0213	-34.1355	1594.3
2015	12	5	5	32	0	18.0233	-34.1373	1588
2015	12	5	5	33	0	18.0257	-34.1392	1548.34
2015	12	5	5	34	0	18.0278	-34.141	1581.59
2015	12	5	5	35	0	18.028	-34.1432	1642.17
2015	12	5	5	36	0	18.0272	-34.1454	1651.56
2015	12	5	5	37	0	18.027	-34.148	1656.08
2015	12	5	5	38	0	18.0268	-34.1504	1310.65
2015	12	5	5	39	0	18.025	-34.1518	1056.26
2015	12	5	5	40	0	18.022	-34.1519	1519.72
2015	12	5	5	41	0	18.0185	-34.1519	1535.88
2015	12	5	5	42	0	18.0148	-34.152	1523.23
2015	12	5	5	43	0	18.0111	-34.1521	1463.64
2015	12	5	5	44	0	18.0072	-34.1522	1332.16
2015	12	5	5	45	0	18.0033	-34.1522	1537.54
2015	12	5	5	46	0	17.9992	-34.1522	1612.33
2015	12	5	5	47	0	17.9953	-34.1522	1424.09
2015	12	5	5	48	0	17.9913	-34.1523	1425.23
2015	12	5	5	49	0	17.9876	-34.153	1130.96
2015	12	5	5	50	0	17.9844	-34.1545	1159.68
2015	12	5	5	51	0	17.9813	-34.1562	1274.4
2015	12	5	5	52	0	17.9781	-34.1578	1331.36
2015	12	5	5	53	0	17.9745	-34.1589	1350.71
2015	12	5	5	54	0	17.9709	-34.1602	1307.03
2015	12	5	5	55	0	17.9677	-34.1619	1296.11
2015	12	5	5	56	0	17.9651	-34.164	1081.17
2015	12	5	5	57	0	17.9624	-34.1661	1025.38
2015	12	5	5	58	0	17.9594	-34.168	1428.34
2015	12	5	5	59	0	17.9561	-34.1697	1069.46
2015	12	5	6	0	0	17.953	-34.1713	944.26
2015	12	5	6	1	0	17.95	-34.1732	1204.74
2015	12	5	6	2	0	17.9472	-34.1754	1074.28
2015	12	5	6	3	0	17.9444	-34.1773	984.38
2015	12	5	6	4	0	17.9415	-34.1793	1118.72
2015	12	5	6	5	0	17.9386	-34.1813	945.66
2015	12	5	6	6	0	17.9356	-34.1833	1014.11
2015	12	5	6	7	0	17.9326	-34.1853	1130.46
2015	12	5	6	8	0	17.9299	-34.1873	915.29
2015	12	5	6	9	0	17.927	-34.1893	788.97
2015	12	5	6	10	0	17.924	-34.1913	1440.77
2015	12	5	6	11	0	17.9211	-34.1932	1532.61
2015	12	5	6	12	0	17.9181	-34.1951	1672.16
2015	12	5	6	13	0	17.9149	-34.197	1699.96
2015	12	5	6	14	0	17.912	-34.199	1706.29
2015	12	5	6	15	0	17.9091	-34.2009	1699.03
2015	12	5	6	16	0	17.9062	-34.2028	1696.26
2015	12	5	6	17	0	17.9033	-34.2049	1701.74
2015	12	5	6	18	0	17.9002	-34.2068	1691.65
2015	12	5	6	19	0	17.8972	-34.2087	1700.89
2015	12	5	6	20	0	17.8944	-34.2106	1665.37
2015	12	5	6	21	0	17.8916	-34.2126	1697.14
2015	12	5	6	22	0	17.8885	-34.2145	1705.57
2015	12	5	6	23	0	17.8856	-34.2163	1689.94
2015	12	5	6	24	0	17.8826	-34.2182	1668.21
2015	12	5	6	25	0	17.8797	-34.2201	1689.13
2015	12	5	6	26	0	17.8767	-34.2219	1698.05
2015	12	5	6	27	0	17.8737	-34.2238	1703.56
2015	12	5	6	28	0	17.8708	-34.2257	1657.55
2015	12	5	6	29	0	17.8677	-34.2274	1632.01
2015	12	5	6	30	0	17.8646	-34.2293	1716.15
2015	12	5	6	31	0	17.862	-34.2312	1742.14
2015	12	5	6	32	0	17.8591	-34.2332	1769.53
2015	12	5	6	33	0	17.8561	-34.235	1780.1
2015	12	5	6	34	0	17.8529	-34.237	1788.09
2015	12	5	6	35	0	17.8501	-34.2389	1796.94
2015	12	5	6	36	0	17.8471	-34.2409	1802.34
2015	12	5	6	37	0	17.8442	-34.2428	1811.6
2015	12	5	6	38	0	17.8412	-34.2449	1818.23
2015	12	5	6	39	0	17.8383	-34.2468	1812.21
2015	12	5	6	40	0	17.8354	-34.2488	1775.59
2015	12	5	6	41	0	17.8325	-34.2508	1694.89
2015	12	5	6	42	0	17.8295	-34.2527	1818.69
2015	12	5	6	43	0	17.8266	-34.2547	1797.29
2015	12	5	6	44	0	17.8234	-34.2564	1793.08
2015	12	5	6	45	0	17.8201	-34.258	1797.76
2015	12	5	6	46	0	17.817	-34.2598	1788.37
2015	12	5	6	47	0	17.8141	-34.2617	1717.65
2015	12	5	6	48	0	17.8114	-34.2638	1640.83
2015	12	5	6	49	0	17.8086	-34.2658	1655.06
2015	12	5	6	50	0	17.8058	-34.2678	1747.12
2015	12	5	6	51	0	17.8028	-34.2698	1786.32
2015	12	5	6	52	0	17.7999	-34.2717	1788.4
2015	12	5	6	53	0	17.797	-34.2737	1771.43
2015	12	5	6	54	0	17.7941	-34.2757	1778.73
2015	12	5	6	55	0	17.7911	-34.2777	1786.15
2015	12	5	6	56	0	17.7883	-34.2796	1789.08
2015	12	5	6	57	0	17.7854	-34.2814	1786.47
2015	12	5	6	58	0	17.7824	-34.2831	1791.26
2015	12	5	6	59	0	17.7794	-34.2851	1791.08
2015	12	5	7	0	0	17.7767	-34.2869	1794.06
2015	12	5	7	1	0	17.7738	-34.2888	1795.63
2015	12	5	7	2	0	17.7709	-34.2906	1805.68
2015	12	5	7	3	0	17.7679	-34.2924	1815.96
2015	12	5	7	4	0	17.7652	-34.2943	1824.67
2015	12	5	7	5	0	17.7623	-34.2962	1833.14
2015	12	5	7	6	0	17.7595	-34.2981	1844.76
2015	12	5	7	7	0	17.7566	-34.2999	1856.64
2015	12	5	7	8	0	17.7537	-34.3017	1818.96
2015	12	5	7	9	0	17.751	-34.3036	1772.33
2015	12	5	7	10	0	17.7481	-34.3055	1876.11
2015	12	5	7	11	0	17.7453	-34.3073	1885.86
2015	12	5	7	12	0	17.7422	-34.3092	1901.07
2015	12	5	7	13	0	17.7395	-34.3111	1898.36
2015	12	5	7	14	0	17.7366	-34.313	1925.12
2015	12	5	7	15	0	17.7338	-34.3148	1959.34
2015	12	5	7	16	0	17.7308	-34.3167	1957.44
2015	12	5	7	17	0	17.728	-34.3187	1837.73
2015	12	5	7	18	0	17.725	-34.3205	1697.63
2015	12	5	7	19	0	17.7221	-34.3222	1765.65
2015	12	5	7	20	0	17.7194	-34.3239	1853.61
2015	12	5	7	21	0	17.7164	-34.326	1905.92
2015	12	5	7	22	0	17.7135	-34.3278	1888.01
2015	12	5	7	23	0	17.7105	-34.3297	1890.36
2015	12	5	7	24	0	17.7076	-34.3316	1756.47
2015	12	5	7	25	0	17.7046	-34.3335	1900.21
2015	12	5	7	26	0	17.7018	-34.3353	2014.44
2015	12	5	7	27	0	17.6988	-34.3372	2084.39
2015	12	5	7	28	0	17.6959	-34.3392	2080.6
2015	12	5	7	29	0	17.6933	-34.3411	1946.56
2015	12	5	7	30	0	17.6905	-34.3429	2216.91
2015	12	5	7	31	0	17.6875	-34.3448	2266.3
2015	12	5	7	32	0	17.6847	-34.3467	2287.03
2015	12	5	7	33	0	17.6818	-34.3485	2334.26
2015	12	5	7	34	0	17.6789	-34.3503	2283.32
2015	12	5	7	35	0	17.6761	-34.3521	1981.24
2015	12	5	7	36	0	17.6731	-34.354	1595.38
2015	12	5	7	37	0	17.6703	-34.3558	1145.06
2015	12	5	7	38	0	17.6674	-34.3578	1034.84
2015	12	5	7	39	0	17.6645	-34.3597	1037.79
2015	12	5	7	40	0	17.6616	-34.3616	1237.1
2015	12	5	7	41	0	17.6588	-34.3635	1172.72
2015	12	5	7	42	0	17.6558	-34.3653	1045.31
2015	12	5	7	43	0	17.6529	-34.3672	1022.47
2015	12	5	7	44	0	17.6501	-34.3689	1037.36
2015	12	5	7	45	0	17.6471	-34.3708	1061
2015	12	5	7	46	0	17.6443	-34.3727	1088.24
2015	12	5	7	47	0	17.6416	-34.3746	1159.24
2015	12	5	7	48	0	17.639	-34.3764	1187.09
2015	12	5	7	49	0	17.6361	-34.3782	1133.86
2015	12	5	7	50	0	17.6331	-34.3799	1113.59
2015	12	5	7	51	0	17.63	-34.3812	1078.55
2015	12	5	7	52	0	17.6267	-34.3824	1019.1
2015	12	5	7	53	0	17.623	-34.3836	975
2015	12	5	7	54	0	17.6197	-34.3848	959.84
2015	12	5	7	55	0	17.6163	-34.386	955.96
2015	12	5	7	56	0	17.6128	-34.3872	946.32
2015	12	5	7	57	0	17.6094	-34.3884	954.37
2015	12	5	7	58	0	17.6061	-34.3897	959
2015	12	5	7	59	0	17.6027	-34.3909	1027.76
2015	12	5	8	0	0	17.5994	-34.3922	1264.19
2015	12	5	8	1	0	17.596	-34.3934	1266.36
2015	12	5	8	2	0	17.5927	-34.3945	1162.15
2015	12	5	8	3	0	17.5892	-34.3957	1306.71
2015	12	5	8	4	0	17.586	-34.3969	1263.1
2015	12	5	8	5	0	17.5826	-34.3982	1377.13
2015	12	5	8	6	0	17.5791	-34.3993	1117.66
2015	12	5	8	7	0	17.5756	-34.4005	1324.9
2015	12	5	8	8	0	17.5724	-34.4017	1803.5
2015	12	5	8	9	0	17.569	-34.403	2232.93
2015	12	5	8	10	0	17.5655	-34.4043	2005.25
2015	12	5	8	11	0	17.5621	-34.4055	1848.54
2015	12	5	8	12	0	17.5588	-34.4067	1782.56
2015	12	5	8	13	0	17.5553	-34.408	1774.41
2015	12	5	8	14	0	17.5518	-34.4092	2022.81
2015	12	5	8	15	0	17.5483	-34.4104	2223.7
2015	12	5	8	16	0	17.5449	-34.4117	2158.14
2015	12	5	8	17	0	17.5415	-34.413	1835.31
2015	12	5	8	18	0	17.538	-34.4142	1236.3
2015	12	5	8	19	0	17.5345	-34.4153	1299.96
2015	12	5	8	20	0	17.5311	-34.4166	1350.98
2015	12	5	8	21	0	17.5278	-34.418	1433.58
2015	12	5	8	22	0	17.5244	-34.4192	1538.08
2015	12	5	8	23	0	17.5208	-34.4204	1487.63
2015	12	5	8	24	0	17.5174	-34.4216	1534.1
2015	12	5	8	25	0	17.5139	-34.4228	1493.74
2015	12	5	8	26	0	17.5106	-34.4241	1659.93
2015	12	5	8	27	0	17.5072	-34.4252	1624.79
2015	12	5	8	28	0	17.5038	-34.4265	1444.06
2015	12	5	8	29	0	17.5003	-34.4277	1261.97
2015	12	5	8	30	0	17.4969	-34.4289	1269.93
2015	12	5	8	31	0	17.4935	-34.4301	1366.14
2015	12	5	8	32	0	17.4901	-34.4313	1520.05
2015	12	5	8	33	0	17.4868	-34.4324	1513.1
2015	12	5	8	34	0	17.4835	-34.4338	1675.8
2015	12	5	8	35	0	17.4801	-34.4349	1822.59
2015	12	5	8	36	0	17.4766	-34.436	1734.43
2015	12	5	8	37	0	17.4731	-34.4372	1400.53
2015	12	5	8	38	0	17.4698	-34.4385	1254.82
2015	12	5	8	39	0	17.4666	-34.4399	1205.17
2015	12	5	8	40	0	17.4633	-34.4412	1279.85
2015	12	5	8	41	0	17.4599	-34.4423	1339.31
2015	12	5	8	42	0	17.4565	-34.4434	1393.29
2015	12	5	8	43	0	17.453	-34.4446	1477.5
2015	12	5	8	44	0	17.4496	-34.4458	1532.79
2015	12	5	8	45	0	17.4464	-34.4471	1472.69
2015	12	5	8	46	0	17.4431	-34.4482	1370.96
2015	12	5	8	47	0	17.4393	-34.4487	1849.04
2015	12	5	8	48	0	17.4356	-34.4488	2049.59
2015	12	5	8	49	0	17.4317	-34.449	2023.31
2015	12	5	8	50	0	17.4279	-34.4492	2429.35
2015	12	5	8	51	0	17.424	-34.4496	1861.06
2015	12	5	8	52	0	17.4202	-34.45	1843.34
2015	12	5	8	53	0	17.4165	-34.4504	1972.76
2015	12	5	8	54	0	17.4127	-34.4509	1585.15
2015	12	5	8	55	0	17.4088	-34.4513	1557.58
2015	12	5	8	56	0	17.405	-34.4517	1415.29
2015	12	5	8	57	0	17.4012	-34.4521	1401.52
2015	12	5	8	58	0	17.3973	-34.4525	1717.66
2015	12	5	8	59	0	17.3941	-34.4537	1708.19
2015	12	5	9	0	0	17.3911	-34.4552	1354.93
2015	12	5	9	1	0	17.388	-34.4566	1225.89
2015	12	5	9	2	0	17.3847	-34.458	1027.43
2015	12	5	9	3	0	17.3813	-34.4593	1061.3
2015	12	5	9	4	0	17.3779	-34.4606	1234.43
2015	12	5	9	5	0	17.3748	-34.4619	1367.13
2015	12	5	9	6	0	17.3715	-34.4634	1761.57
2015	12	5	9	7	0	17.3685	-34.465	2015.53
2015	12	5	9	8	0	17.3655	-34.4665	1773.68
2015	12	5	9	9	0	17.3625	-34.4678	1713.69
2015	12	5	9	10	0	17.3592	-34.4693	1420.39
2015	12	5	9	11	0	17.3561	-34.4708	1751.64
2015	12	5	9	12	0	17.3532	-34.4724	1664.5
2015	12	5	9	13	0	17.35	-34.474	1402.52
2015	12	5	9	14	0	17.347	-34.4754	1374.52
2015	12	5	9	15	0	17.3439	-34.4768	1738.92
2015	12	5	9	16	0	17.3411	-34.4781	1444.96
2015	12	5	9	17	0	17.3383	-34.4796	1888.85
2015	12	5	9	18	0	17.3355	-34.481	2047.45
2015	12	5	9	19	0	17.3327	-34.4823	2223.82
2015	12	5	9	20	0	17.3301	-34.4835	2063.83
2015	12	5	9	21	0	17.3275	-34.4848	1689.01
2015	12	5	9	22	0	17.3251	-34.486	1603.94
2015	12	5	9	23	0	17.3224	-34.4873	1221.84
2015	12	5	9	24	0	17.3196	-34.4885	1082.93
2015	12	5	9	25	0	17.317	-34.4896	1327.28
2015	12	5	9	26	0	17.3144	-34.4908	1319.87
2015	12	5	9	27	0	17.3117	-34.4918	1645.4
2015	12	5	9	28	0	17.3087	-34.4926	1321.63
2015	12	5	9	29	0	17.3055	-34.4932	1848.73
2015	12	5	9	30	0	17.3023	-34.4937	1475.14
2015	12	5	9	31	0	17.2992	-34.4942	1893.63
2015	12	5	9	32	0	17.2961	-34.4948	1770.96
2015	12	5	9	33	0	17.293	-34.4955	2149.9
2015	12	5	9	34	0	17.2899	-34.4961	1508.02
2015	12	5	9	35	0	17.2868	-34.4967	1855.95
2015	12	5	9	36	0	17.2836	-34.497	1442.75
2015	12	5	9	37	0	17.2802	-34.4971	1594.21
2015	12	5	9	38	0	17.277	-34.4971	1873.94
2015	12	5	9	39	0	17.2737	-34.4974	1789.39
2015	12	5	9	40	0	17.2706	-34.4978	1763.58
2015	12	5	9	41	0	17.2675	-34.4984	1798.41
2015	12	5	9	42	0	17.2643	-34.4988	1654.77
2015	12	5	9	43	0	17.2611	-34.4991	1788.95
2015	12	5	9	44	0	17.2577	-34.4992	1786.63
2015	12	5	9	45	0	17.2544	-34.4992	1360.6
2015	12	5	9	46	0	17.251	-34.4991	1538.07
2015	12	5	9	47	0	17.2477	-34.4992	2108.15
2015	12	5	9	48	0	17.2445	-34.4993	1636.86
2015	12	5	9	49	0	17.2412	-34.4996	1997.8
2015	12	5	9	50	0	17.238	-34.4997	1562.81
2015	12	5	9	51	0	17.2346	-34.4998	1531.25
2015	12	5	9	52	0	17.2313	-34.4999	1835.7
2015	12	5	9	53	0	17.228	-34.5001	1924.85
2015	12	5	9	54	0	17.2248	-34.5003	1604.31
2015	12	5	9	55	0	17.2216	-34.5001	1392.91
2015	12	5	9	56	0	17.2183	-34.4996	1719.45
2015	12	5	9	57	0	17.2148	-34.4989	1564.28
2015	12	5	9	58	0	17.2115	-34.4987	1864.16
2015	12	5	9	59	0	17.2084	-34.499	1717.89
2015	12	5	10	0	0	17.2053	-34.4993	1720.64
2015	12	5	10	1	0	17.2021	-34.4997	1684.75
2015	12	5	10	2	0	17.1988	-34.4999	2025.89
2015	12	5	10	3	0	17.1956	-34.4999	1535.16
2015	12	5	10	4	0	17.1921	-34.5	1436.41
2015	12	5	10	5	0	17.1887	-34.5002	1273.85
2015	12	5	10	6	0	17.1854	-34.5004	1214.34
2015	12	5	10	7	0	17.1822	-34.5004	1284.9
2015	12	5	10	8	0	17.1788	-34.5	1580.66
2015	12	5	10	9	0	17.1755	-34.4993	1559.25
2015	12	5	10	10	0	17.1721	-34.4988	2306.17
2015	12	5	10	11	0	17.1688	-34.4988	1286.56
2015	12	5	10	12	0	17.1655	-34.4991	1070.95
2015	12	5	10	13	0	17.1624	-34.4994	1108.11
2015	12	5	10	14	0	17.1592	-34.4996	1224.64
2015	12	5	10	15	0	17.1559	-34.4997	2175.98
2015	12	5	10	16	0	17.1526	-34.4998	2226.68
2015	12	5	10	17	0	17.1492	-34.4999	1907.24
2015	12	5	10	18	0	17.1458	-34.4999	1659.07
2015	12	5	10	19	0	17.1425	-34.5	1555.3
2015	12	5	10	20	0	17.1393	-34.4999	1647.93
2015	12	5	10	21	0	17.1358	-34.4998	1329.3
2015	12	5	10	22	0	17.1324	-34.4998	1699.55
2015	12	5	10	23	0	17.1291	-34.4998	2482.44
2015	12	5	10	24	0	17.1259	-34.4998	1443.1
2015	12	5	10	25	0	17.1225	-34.4998	1318.43
2015	12	5	10	26	0	17.1192	-34.4998	1414.04
2015	12	5	10	27	0	17.1159	-34.4999	1883.83
2015	12	5	10	28	0	17.1126	-34.4999	2090.06
2015	12	5	10	29	0	17.1093	-34.4999	1523.32
2015	12	5	10	30	0	17.1061	-34.4999	1485.57
2015	12	5	10	31	0	17.1032	-34.4999	1447.81
2015	12	5	10	32	0	17.0996	-34.4999	2436.06
2015	12	5	10	33	0	17.0967	-34.5001	1501.35
2015	12	5	10	34	0	17.0939	-34.5003	1343.77
2015	12	5	10	35	0	17.0911	-34.5003	1410.71
2015	12	5	10	36	0	17.0883	-34.5002	1295.05
2015	12	5	10	37	0	17.0856	-34.5002	1434.03
2015	12	5	10	38	0	17.0828	-34.5002	1643.56
2015	12	5	10	39	0	17.08	-34.5002	1375.86
2015	12	5	10	40	0	17.0771	-34.5001	2267.56
2015	12	5	10	41	0	17.0744	-34.5001	1504.38
2015	12	5	10	42	0	17.0715	-34.5	1128.01
2015	12	5	10	43	0	17.0689	-34.5	1211.3
2015	12	5	10	44	0	17.066	-34.4999	1301.13
2015	12	5	10	45	0	17.0632	-34.4999	1256.55
2015	12	5	10	46	0	17.0604	-34.4999	1323.2
2015	12	5	10	47	0	17.0577	-34.4999	1464.86
2015	12	5	10	48	0	17.0549	-34.4999	1209.05
2015	12	5	10	49	0	17.052	-34.4999	1119.29
2015	12	5	10	50	0	17.0484	-34.4997	1151.61
2015	12	5	10	51	0	17.0448	-34.4995	1129.69
2015	12	5	10	52	0	17.0413	-34.4995	1139.47
2015	12	5	10	53	0	17.0377	-34.4996	1095.61
2015	12	5	10	54	0	17.0344	-34.4996	991.28
2015	12	5	10	55	0	17.0306	-34.4997	1113.94
2015	12	5	10	56	0	17.027	-34.4997	1465.83
2015	12	5	10	57	0	17.0235	-34.4998	2082.45
2015	12	5	10	58	0	17.0201	-34.4999	1540.72
2015	12	5	10	59	0	17.0172	-34.4998	1407.88
2015	12	5	11	0	0	17.0145	-34.4999	1554.73
2015	12	5	11	1	0	17.0111	-34.4999	1808.64
2015	12	5	11	2	0	17.0075	-34.4999	1779.99
2015	12	5	11	3	0	17.0035	-34.4999	1480.36
2015	12	5	11	4	0	16.9997	-34.4999	1392.35
2015	12	5	11	5	0	16.9957	-34.4999	1425.26
2015	12	5	11	6	0	16.9917	-34.4999	1346.58
2015	12	5	11	7	0	16.9876	-34.4999	1259.82
2015	12	5	11	8	0	16.9832	-34.4999	1284.49
2015	12	5	11	9	0	16.9786	-34.4999	1294.6
2015	12	5	11	10	0	16.974	-34.4999	1293.8
2015	12	5	11	11	0	16.9694	-34.4998	1605.11
2015	12	5	11	12	0	16.9648	-34.4998	1217.43
2015	12	5	11	13	0	16.9601	-34.4999	734.91
2015	12	5	11	14	0	16.9555	-34.4999	817.65
2015	12	5	11	15	0	16.9508	-34.4999	1138.25
2015	12	5	11	16	0	16.9461	-34.4999	1374.3
2015	12	5	11	17	0	16.9415	-34.4999	1191.95
2015	12	5	11	18	0	16.9367	-34.4999	1069.39
2015	12	5	11	19	0	16.9322	-34.5001	1077.2
2015	12	5	11	20	0	16.9274	-34.4999	1217.23
2015	12	5	11	21	0	16.9226	-34.4999	1284.92
2015	12	5	11	22	0	16.9177	-34.5	968.25
2015	12	5	11	23	0	16.913	-34.5	931.72
2015	12	5	11	24	0	16.9081	-34.4999	1174.64
2015	12	5	11	25	0	16.9033	-34.4999	1363.51
2015	12	5	11	26	0	16.8984	-34.4999	1378.09
2015	12	5	11	27	0	16.8935	-34.4999	1378.81
2015	12	5	11	28	0	16.8886	-34.5	1414.49
2015	12	5	11	29	0	16.8835	-34.5	1230.66
2015	12	5	11	30	0	16.8786	-34.5	1092.99
2015	12	5	11	31	0	16.8738	-34.5	1135.81
2015	12	5	11	32	0	16.869	-34.5	1117.43
2015	12	5	11	33	0	16.864	-34.4999	1047.98
2015	12	5	11	34	0	16.8589	-34.4999	1048.31
2015	12	5	11	35	0	16.8541	-34.4999	1082.19
2015	12	5	11	36	0	16.8491	-34.4999	937.33
2015	12	5	11	37	0	16.8442	-34.4999	939.81
2015	12	5	11	38	0	16.8394	-34.4999	990.1
2015	12	5	11	39	0	16.8344	-34.4999	931.76
2015	12	5	11	40	0	16.8295	-34.4998	947.51
2015	12	5	11	41	0	16.8245	-34.4999	949.56
2015	12	5	11	42	0	16.8197	-34.5	973.83
2015	12	5	11	43	0	16.8148	-34.4999	1087.23
2015	12	5	11	44	0	16.8099	-34.4999	1023.79
2015	12	5	11	45	0	16.805	-34.4999	800.94
2015	12	5	11	46	0	16.8	-34.5	657.26
2015	12	5	11	47	0	16.7951	-34.5	560.32
2015	12	5	11	48	0	16.7903	-34.5001	501.44
2015	12	5	11	49	0	16.7855	-34.5001	572.75
2015	12	5	11	50	0	16.7808	-34.5001	706.81
2015	12	5	11	51	0	16.776	-34.5	787.72
2015	12	5	11	52	0	16.7711	-34.5	804.45
2015	12	5	11	53	0	16.7664	-34.5	833.92
2015	12	5	11	54	0	16.7615	-34.4999	819.93
2015	12	5	11	55	0	16.7568	-34.4999	825.62
2015	12	5	11	56	0	16.752	-34.4999	846.98
2015	12	5	11	57	0	16.7473	-34.5	857.08
2015	12	5	11	58	0	16.7426	-34.5001	832.74
2015	12	5	11	59	0	16.7378	-34.5001	818.37
2015	12	5	12	0	0	16.733	-34.5	810.19
2015	12	5	12	1	0	16.7285	-34.5001	790.9
2015	12	5	12	2	0	16.7242	-34.5001	849.69
2015	12	5	12	3	0	16.7199	-34.5001	905.52
2015	12	5	12	4	0	16.7158	-34.5001	913.05
2015	12	5	12	5	0	16.7115	-34.5001	942.78
2015	12	5	12	6	0	16.7072	-34.5	958.67
2015	12	5	12	7	0	16.7026	-34.4999	930.14
2015	12	5	12	8	0	16.6979	-34.4999	897.15
2015	12	5	12	9	0	16.6931	-34.4999	938.18
2015	12	5	12	10	0	16.6884	-34.4999	973.28
2015	12	5	12	11	0	16.6836	-34.4999	995.05
2015	12	5	12	12	0	16.6788	-34.4999	1020.17
2015	12	5	12	13	0	16.6741	-34.4999	1028.47
2015	12	5	12	14	0	16.6694	-34.4999	1041.11
2015	12	5	12	15	0	16.6645	-34.5001	1096.36
2015	12	5	12	16	0	16.6596	-34.5001	1168.85
2015	12	5	12	17	0	16.6551	-34.5	1159.4
2015	12	5	12	18	0	16.6501	-34.5	1105.44
2015	12	5	12	19	0	16.6454	-34.5	1076.4
2015	12	5	12	20	0	16.6408	-34.5	1121.19
2015	12	5	12	21	0	16.6358	-34.5	1177.31
2015	12	5	12	22	0	16.631	-34.5001	1214.79
2015	12	5	12	23	0	16.6263	-34.5	1225.88
2015	12	5	12	24	0	16.6217	-34.4999	1236.13
2015	12	5	12	25	0	16.6169	-34.4998	1258.66
2015	12	5	12	26	0	16.6122	-34.4999	1267.26
2015	12	5	12	27	0	16.6074	-34.4999	1318.7
2015	12	5	12	28	0	16.6028	-34.4999	1367.32
2015	12	5	12	29	0	16.598	-34.4999	1452.9
2015	12	5	12	30	0	16.5933	-34.4999	1375.78
2015	12	5	12	31	0	16.5885	-34.4999	1393.77
2015	12	5	12	32	0	16.5838	-34.4999	1424
2015	12	5	12	33	0	16.5791	-34.4999	1380.85
2015	12	5	12	34	0	16.5743	-34.4999	1360.86
2015	12	5	12	35	0	16.5697	-34.4999	1372.24
2015	12	5	12	36	0	16.5651	-34.4999	1340.87
2015	12	5	12	37	0	16.5604	-34.5	1334.78
2015	12	5	12	38	0	16.5556	-34.5	1355.01
2015	12	5	12	39	0	16.5509	-34.4999	1292.85
2015	12	5	12	40	0	16.5462	-34.4999	1219.23
2015	12	5	12	41	0	16.5416	-34.4999	1106.16
2015	12	5	12	42	0	16.537	-34.5	963.17
2015	12	5	12	43	0	16.5321	-34.4999	880.06
2015	12	5	12	44	0	16.5275	-34.4999	849.24
2015	12	5	12	45	0	16.5227	-34.4999	850.19
2015	12	5	12	46	0	16.5181	-34.4999	889.3
2015	12	5	12	47	0	16.5133	-34.4999	936.19
2015	12	5	12	48	0	16.5087	-34.5	941.93
2015	12	5	12	49	0	16.5039	-34.5	887.32
2015	12	5	12	50	0	16.4991	-34.4999	871.78
2015	12	5	12	51	0	16.4944	-34.4999	837.64
2015	12	5	12	52	0	16.4896	-34.4999	779.38
2015	12	5	12	53	0	16.4848	-34.4999	780.93
2015	12	5	12	54	0	16.4801	-34.4999	798.62
2015	12	5	12	55	0	16.4754	-34.4999	805.98
2015	12	5	12	56	0	16.4706	-34.5	812.8
2015	12	5	12	57	0	16.4659	-34.5	815.2
2015	12	5	12	58	0	16.4612	-34.5	812.31
2015	12	5	12	59	0	16.4564	-34.4999	815.11
2015	12	5	13	0	0	16.4517	-34.4999	801.03
2015	12	5	13	1	0	16.4469	-34.4999	735.72
2015	12	5	13	2	0	16.4422	-34.4999	720.79
2015	12	5	13	3	0	16.4374	-34.4998	714.45
2015	12	5	13	4	0	16.4327	-34.4998	714.67
2015	12	5	13	5	0	16.4281	-34.4997	817.52
2015	12	5	13	6	0	16.4233	-34.4997	876.22
2015	12	5	13	7	0	16.4185	-34.4998	829.41
2015	12	5	13	8	0	16.4139	-34.4998	752.29
2015	12	5	13	9	0	16.4092	-34.4998	660.32
2015	12	5	13	10	0	16.4045	-34.4997	635.5
2015	12	5	13	11	0	16.3997	-34.4997	562.99
2015	12	5	13	12	0	16.395	-34.4997	496.01
2015	12	5	13	13	0	16.3903	-34.4998	458.19
2015	12	5	13	14	0	16.3856	-34.4998	419.15
2015	12	5	13	15	0	16.3809	-34.4998	443.57
2015	12	5	13	16	0	16.3762	-34.4998	438.38
2015	12	5	13	17	0	16.3715	-34.4998	463.08
2015	12	5	13	18	0	16.3669	-34.4998	519.18
2015	12	5	13	19	0	16.3621	-34.4998	590.79
2015	12	5	13	20	0	16.3574	-34.5	667.36
2015	12	5	13	21	0	16.3528	-34.5	696.57
2015	12	5	13	22	0	16.3482	-34.4999	672.7
2015	12	5	13	23	0	16.3434	-34.4999	637.08
2015	12	5	13	24	0	16.3386	-34.4999	626.69
2015	12	5	13	25	0	16.334	-34.4999	664.38
2015	12	5	13	26	0	16.3294	-34.4999	842.28
2015	12	5	13	27	0	16.3246	-34.4999	988.88
2015	12	5	13	28	0	16.3199	-34.4999	1158.3
2015	12	5	13	29	0	16.3152	-34.4999	1177.86
2015	12	5	13	30	0	16.3107	-34.5	1143.2
2015	12	5	13	31	0	16.306	-34.5	1065.41
2015	12	5	13	32	0	16.3012	-34.4999	1053.31
2015	12	5	13	33	0	16.2966	-34.4999	1031.04
2015	12	5	13	34	0	16.292	-34.4999	970.46
2015	12	5	13	35	0	16.2873	-34.4999	942.99
2015	12	5	13	36	0	16.2827	-34.4999	953.62
2015	12	5	13	37	0	16.278	-34.4999	1026.93
2015	12	5	13	38	0	16.2734	-34.5	1143.18
2015	12	5	13	39	0	16.2688	-34.4999	1920.16
2015	12	5	13	40	0	16.2641	-34.4999	1646.42
2015	12	5	13	41	0	16.2593	-34.4999	1451.37
2015	12	5	13	42	0	16.2546	-34.4999	1212.32
2015	12	5	13	43	0	16.2501	-34.5	1142.11
2015	12	5	13	44	0	16.2455	-34.4999	1148.71
2015	12	5	13	45	0	16.2406	-34.4999	1100.88
2015	12	5	13	46	0	16.2359	-34.5	1046.44
2015	12	5	13	47	0	16.2317	-34.4999	1131.86
2015	12	5	13	48	0	16.2265	-34.4999	1242.37
2015	12	5	13	49	0	16.2218	-34.4999	1162.44
2015	12	5	13	50	0	16.2171	-34.4998	1290.68
2015	12	5	13	51	0	16.2125	-34.4998	1233.13
2015	12	5	13	52	0	16.2078	-34.4998	1030.74
2015	12	5	13	53	0	16.203	-34.4998	850.48
2015	12	5	13	54	0	16.1984	-34.4999	809.55
2015	12	5	13	55	0	16.1935	-34.4999	972.19
2015	12	5	13	56	0	16.1889	-34.4999	986.78
2015	12	5	13	57	0	16.1842	-34.4999	911.91
2015	12	5	13	58	0	16.1805	-34.4998	782.91
2015	12	5	13	59	0	16.1776	-34.4998	863.86
2015	12	5	14	0	0	16.1756	-34.5	924.74
2015	12	5	14	1	0	16.174	-34.5004	938.63
2015	12	5	14	2	0	16.1724	-34.5009	999.02
2015	12	5	14	3	0	16.1703	-34.5013	1074.31
2015	12	5	14	4	0	16.1683	-34.5015	1045.03
2015	12	5	14	5	0	16.1664	-34.5016	887.28
2015	12	5	14	6	0	16.1645	-34.5018	842.02
2015	12	5	14	7	0	16.1627	-34.5019	797.71
2015	12	5	14	8	0	16.1607	-34.502	775.9
2015	12	5	14	9	0	16.1588	-34.502	743.43
2015	12	5	14	10	0	16.1567	-34.5019	773.43
2015	12	5	14	11	0	16.1547	-34.5018	855.72
2015	12	5	14	12	0	16.1526	-34.5016	919.57
2015	12	5	14	13	0	16.1506	-34.5015	936.94
2015	12	5	14	14	0	16.1487	-34.5014	777.9
2015	12	5	14	15	0	16.1468	-34.5014	665.19
2015	12	5	14	16	0	16.1449	-34.5014	556.4
2015	12	5	14	17	0	16.1431	-34.5014	543.93
2015	12	5	14	18	0	16.1407	-34.5014	566.37
2015	12	5	14	19	0	16.1375	-34.5012	587.96
2015	12	5	14	20	0	16.1336	-34.5007	643.33
2015	12	5	14	21	0	16.1293	-34.5002	741.56
2015	12	5	14	22	0	16.1249	-34.5003	881.05
2015	12	5	14	23	0	16.1203	-34.5008	1009.3
2015	12	5	14	24	0	16.1158	-34.5011	1022.8
2015	12	5	14	25	0	16.1114	-34.5014	1073.51
2015	12	5	14	26	0	16.1069	-34.5012	1064.17
2015	12	5	14	27	0	16.1028	-34.5002	985.53
2015	12	5	14	28	0	16.0984	-34.4999	891.16
2015	12	5	14	29	0	16.094	-34.5001	844.8
2015	12	5	14	30	0	16.0893	-34.4999	754.24
2015	12	5	14	31	0	16.0847	-34.4999	610.93
2015	12	5	14	32	0	16.0802	-34.4999	548.32
2015	12	5	14	33	0	16.0756	-34.4999	534.21
2015	12	5	14	34	0	16.071	-34.4999	565.9
2015	12	5	14	35	0	16.0665	-34.4999	650.06
2015	12	5	14	36	0	16.0618	-34.4999	693.91
2015	12	5	14	37	0	16.0573	-34.4998	867.03
2015	12	5	14	38	0	16.0527	-34.4999	942.92
2015	12	5	14	39	0	16.0481	-34.4999	1027.46
2015	12	5	14	40	0	16.0435	-34.4999	1137.95
2015	12	5	14	41	0	16.0389	-34.4999	1209.48
2015	12	5	14	42	0	16.0344	-34.4999	1136.67
2015	12	5	14	43	0	16.0298	-34.4999	1066.55
2015	12	5	14	44	0	16.0252	-34.4999	1041.4
2015	12	5	14	45	0	16.0206	-34.4999	1025.63
2015	12	5	14	46	0	16.016	-34.4999	1062.14
2015	12	5	14	47	0	16.0115	-34.4999	1037.47
2015	12	5	14	48	0	16.0069	-34.5	1060.5
2015	12	5	14	49	0	16.0022	-34.4999	1069.51
2015	12	5	14	50	0	15.9977	-34.5	1083.17
2015	12	5	14	51	0	15.993	-34.4999	1063.13
2015	12	5	14	52	0	15.9884	-34.4999	986.88
2015	12	5	14	53	0	15.9839	-34.4999	968.65
2015	12	5	14	54	0	15.9794	-34.4999	952.05
2015	12	5	14	55	0	15.9748	-34.4999	936.63
2015	12	5	14	56	0	15.9703	-34.4999	967.41
2015	12	5	14	57	0	15.9657	-34.4999	1016.95
2015	12	5	14	58	0	15.9613	-34.4999	927.79
2015	12	5	14	59	0	15.9567	-34.4999	875.5
2015	12	5	15	0	0	15.9521	-34.4999	856.35
2015	12	5	15	1	0	15.9475	-34.4999	900.3
2015	12	5	15	2	0	15.943	-34.4999	874.51
2015	12	5	15	3	0	15.9385	-34.4999	822.41
2015	12	5	15	4	0	15.934	-34.4999	819.52
2015	12	5	15	5	0	15.9294	-34.4999	772.95
2015	12	5	15	6	0	15.9251	-34.4999	750.26
2015	12	5	15	7	0	15.9204	-34.4999	730.61
2015	12	5	15	8	0	15.916	-34.4999	693.73
2015	12	5	15	9	0	15.9115	-34.4999	698.63
2015	12	5	15	10	0	15.9069	-34.4999	676.29
2015	12	5	15	11	0	15.9023	-34.4999	644.13
2015	12	5	15	12	0	15.898	-34.4999	639
2015	12	5	15	13	0	15.8935	-34.4999	611.05
2015	12	5	15	14	0	15.8889	-34.4999	601.94
2015	12	5	15	15	0	15.8843	-34.4999	615.22
2015	12	5	15	16	0	15.8798	-34.4999	589.58
2015	12	5	15	17	0	15.8755	-34.4999	553.91
2015	12	5	15	18	0	15.8708	-34.4999	559.06
2015	12	5	15	19	0	15.8663	-34.4999	588.73
2015	12	5	15	20	0	15.8619	-34.4999	616.06
2015	12	5	15	21	0	15.8574	-34.4999	651.66
2015	12	5	15	22	0	15.8529	-34.4999	692.43
2015	12	5	15	23	0	15.8484	-34.4999	700.56
2015	12	5	15	24	0	15.844	-34.4999	729.74
2015	12	5	15	25	0	15.8394	-34.4999	765.61
2015	12	5	15	26	0	15.835	-34.4999	815.37
2015	12	5	15	27	0	15.8305	-34.4999	983.65
2015	12	5	15	28	0	15.8261	-34.4999	906.97
2015	12	5	15	29	0	15.8216	-34.4999	839.81
2015	12	5	15	30	0	15.8169	-34.4999	801.75
2015	12	5	15	31	0	15.8124	-34.4999	944.58
2015	12	5	15	32	0	15.8078	-34.4999	890.29
2015	12	5	15	33	0	15.8032	-34.4999	788.04
2015	12	5	15	34	0	15.7987	-34.4999	772.31
2015	12	5	15	35	0	15.7942	-34.4999	773.66
2015	12	5	15	36	0	15.7896	-34.4999	769.91
2015	12	5	15	37	0	15.7851	-34.4999	699.09
2015	12	5	15	38	0	15.7805	-34.4999	668.49
2015	12	5	15	39	0	15.7759	-34.4999	652.13
2015	12	5	15	40	0	15.7714	-34.4999	620.53
2015	12	5	15	41	0	15.7669	-34.4999	660.57
2015	12	5	15	42	0	15.7622	-34.4999	723.91
2015	12	5	15	43	0	15.7576	-34.4999	742.16
2015	12	5	15	44	0	15.7531	-34.4999	858.79
2015	12	5	15	45	0	15.7486	-34.4999	695.41
2015	12	5	15	46	0	15.744	-34.4999	655.46
2015	12	5	15	47	0	15.7394	-34.4999	618.05
2015	12	5	15	48	0	15.7349	-34.4999	617.57
2015	12	5	15	49	0	15.7303	-34.4999	710.32
2015	12	5	15	50	0	15.7258	-34.4999	786
2015	12	5	15	51	0	15.7213	-34.4999	880.86
2015	12	5	15	52	0	15.7168	-34.4999	1034.39
2015	12	5	15	53	0	15.7122	-34.4999	1082.95
2015	12	5	15	54	0	15.7075	-34.4999	1491.09
2015	12	5	15	55	0	15.7031	-34.4999	986.44
2015	12	5	15	56	0	15.6985	-34.4999	920.11
2015	12	5	15	57	0	15.6939	-34.4999	1051.22
2015	12	5	15	58	0	15.6893	-34.4999	1097.41
2015	12	5	15	59	0	15.6849	-34.4999	1168.9
2015	12	5	16	0	0	15.6803	-34.4999	1446.33
2015	12	5	16	1	0	15.6758	-34.4999	950.11
2015	12	5	16	2	0	15.6713	-34.4999	900.99
2015	12	5	16	3	0	15.6668	-34.4999	842.52
2015	12	5	16	4	0	15.6624	-34.4999	722.44
2015	12	5	16	5	0	15.6577	-34.4999	664.5
2015	12	5	16	6	0	15.6532	-34.4999	659.91
2015	12	5	16	7	0	15.6487	-34.4999	662.07
2015	12	5	16	8	0	15.6441	-34.4999	611.48
2015	12	5	16	9	0	15.6396	-34.4999	709.11
2015	12	5	16	10	0	15.6351	-34.4999	850.9
2015	12	5	16	11	0	15.6306	-34.4999	860.19
2015	12	5	16	12	0	15.6262	-34.4999	1082.65
2015	12	5	16	13	0	15.6216	-34.4999	1113.22
2015	12	5	16	14	0	15.617	-34.4999	778.44
2015	12	5	16	15	0	15.6126	-34.4999	608.78
2015	12	5	16	16	0	15.608	-34.4999	497.44
2015	12	5	16	17	0	15.6037	-34.4999	428.2
2015	12	5	16	18	0	15.599	-34.4999	417.05
2015	12	5	16	19	0	15.5945	-34.4999	419.68
2015	12	5	16	20	0	15.5901	-34.4999	540.39
2015	12	5	16	21	0	15.5855	-34.4999	677.95
2015	12	5	16	22	0	15.581	-34.4999	858.13
2015	12	5	16	23	0	15.5767	-34.4999	718.93
2015	12	5	16	24	0	15.5721	-34.4999	690.02
2015	12	5	16	25	0	15.5678	-34.4999	1163.1
2015	12	5	16	26	0	15.5633	-34.4999	1175.54
2015	12	5	16	27	0	15.5588	-34.4999	1296.97
2015	12	5	16	28	0	15.5543	-34.4998	924.1
2015	12	5	16	29	0	15.5499	-34.4999	473.86
2015	12	5	16	30	0	15.5455	-34.4999	391.18
2015	12	5	16	31	0	15.541	-34.4998	370.48
2015	12	5	16	32	0	15.5366	-34.4998	359.31
2015	12	5	16	33	0	15.5321	-34.4999	356.62
2015	12	5	16	34	0	15.5278	-34.4999	366.43
2015	12	5	16	35	0	15.5233	-34.4999	580.89
2015	12	5	16	36	0	15.5188	-34.4999	1101.18
2015	12	5	16	37	0	15.5144	-34.4999	1078.27
2015	12	5	16	38	0	15.5099	-34.4999	1082.55
2015	12	5	16	39	0	15.5054	-34.4999	1089.28
2015	12	5	16	40	0	15.5009	-34.4999	1037.57
2015	12	5	16	41	0	15.4965	-34.4999	1102.44
2015	12	5	16	42	0	15.492	-34.4999	1101.71
2015	12	5	16	43	0	15.4876	-34.4999	1041.07
2015	12	5	16	44	0	15.483	-34.4999	1020.8
2015	12	5	16	45	0	15.4786	-34.4999	1029.92
2015	12	5	16	46	0	15.4742	-34.4999	1012.28
2015	12	5	16	47	0	15.4696	-34.4999	1013.66
2015	12	5	16	48	0	15.4651	-34.4998	1019.32
2015	12	5	16	49	0	15.4608	-34.4999	1054.66
2015	12	5	16	50	0	15.4563	-34.4999	1004.2
2015	12	5	16	51	0	15.4517	-34.4999	976.96
2015	12	5	16	52	0	15.4472	-34.4999	964.92
2015	12	5	16	53	0	15.4428	-34.4999	986.88
2015	12	5	16	54	0	15.4382	-34.4999	1037.37
2015	12	5	16	55	0	15.4338	-34.5	929.83
2015	12	5	16	56	0	15.4292	-34.5	862.92
2015	12	5	16	57	0	15.4247	-34.4999	836.29
2015	12	5	16	58	0	15.4201	-34.4999	854.21
2015	12	5	16	59	0	15.4157	-34.4999	812.54
2015	12	5	17	0	0	15.4111	-34.4999	786.54
2015	12	5	17	1	0	15.4067	-34.4999	764.76
2015	12	5	17	2	0	15.4021	-34.4999	712.93
2015	12	5	17	3	0	15.3981	-34.4996	621.55
2015	12	5	17	4	0	15.3949	-34.4989	565.49
2015	12	5	17	5	0	15.392	-34.4981	512.2
2015	12	5	17	6	0	15.3892	-34.4975	472.69
2015	12	5	17	7	0	15.3863	-34.4972	453.8
2015	12	5	17	8	0	15.3834	-34.4973	460.73
2015	12	5	17	9	0	15.3814	-34.4974	398.87
2015	12	5	17	10	0	15.3798	-34.4978	344.86
2015	12	5	17	11	0	15.3785	-34.498	338.34
2015	12	5	17	12	0	15.3772	-34.498	313.16
2015	12	5	17	13	0	15.376	-34.4978	291.22
2015	12	5	17	14	0	15.3747	-34.4974	293.86
2015	12	5	17	15	0	15.3735	-34.497	297.13
2015	12	5	17	16	0	15.3722	-34.4967	286.14
2015	12	5	17	17	0	15.371	-34.4965	270.54
2015	12	5	17	18	0	15.3698	-34.4963	255.66
2015	12	5	17	19	0	15.3686	-34.4963	240.26
2015	12	5	17	20	0	15.3675	-34.4962	225.06
2015	12	5	17	21	0	15.3664	-34.4962	207.4
2015	12	5	17	22	0	15.3652	-34.4962	187.04
2015	12	5	17	23	0	15.3641	-34.4961	172.76
2015	12	5	17	24	0	15.363	-34.496	160.84
2015	12	5	17	25	0	15.3619	-34.496	152.42
2015	12	5	17	26	0	15.3607	-34.4959	145.06
2015	12	5	17	27	0	15.3595	-34.4958	138.75
2015	12	5	17	28	0	15.3581	-34.4956	132.65
2015	12	5	17	29	0	15.3554	-34.4954	126.59
2015	12	5	17	30	0	15.3517	-34.4952	119.52
2015	12	5	17	31	0	15.3477	-34.4951	113.21
2015	12	5	17	32	0	15.3438	-34.4954	106.67
2015	12	5	17	33	0	15.3405	-34.4972	100.69
2015	12	5	17	34	0	15.3375	-34.4993	95.14
2015	12	5	17	35	0	15.3337	-34.4998	88.88
2015	12	5	17	36	0	15.3294	-34.4996	85.15
2015	12	5	17	37	0	15.3251	-34.4997	80.65
2015	12	5	17	38	0	15.3206	-34.4999	71.38
2015	12	5	17	39	0	15.316	-34.4999	67.02
2015	12	5	17	40	0	15.3114	-34.4999	64.99
2015	12	5	17	41	0	15.3068	-34.4999	62.23
2015	12	5	17	42	0	15.3022	-34.4999	61.45
2015	12	5	17	43	0	15.2976	-34.4999	64
2015	12	5	17	44	0	15.2931	-34.4999	60.96
2015	12	5	17	45	0	15.2885	-34.4998	53.23
2015	12	5	17	46	0	15.2838	-34.4999	44.4
2015	12	5	17	47	0	15.2792	-34.4998	37.61
2015	12	5	17	48	0	15.2746	-34.4997	33.1
2015	12	5	17	49	0	15.2701	-34.4998	29.47
2015	12	5	17	50	0	15.2655	-34.4999	26.52
2015	12	5	17	51	0	15.2608	-34.4998	24.33
2015	12	5	17	52	0	15.2562	-34.4998	22.25
2015	12	5	17	53	0	15.2515	-34.4999	20.3
2015	12	5	17	54	0	15.2471	-34.4999	18.27
2015	12	5	17	55	0	15.2425	-34.4999	16.68
2015	12	5	17	56	0	15.2378	-34.4999	15.14
2015	12	5	17	57	0	15.2333	-34.4999	13.74
2015	12	5	17	58	0	15.2286	-34.4999	12.36
2015	12	5	17	59	0	15.224	-34.4999	11.17
2015	12	5	18	0	0	15.2193	-34.4999	10.06
2015	12	5	18	1	0	15.2147	-34.4999	9.06
2015	12	5	18	2	0	15.21	-34.4999	8.05
2015	12	5	18	3	0	15.2054	-34.4999	7.19
2015	12	5	18	4	0	15.2006	-34.4999	6.38
2015	12	5	18	5	0	15.1961	-34.4999	5.64
2015	12	5	18	6	0	15.1914	-34.4999	4.95
2015	12	5	18	7	0	15.1868	-34.4999	4.32
2015	12	5	18	8	0	15.182	-34.4999	3.73
2015	12	5	18	9	0	15.1775	-34.4999	3.22
2015	12	5	18	10	0	15.1728	-34.4999	2.7
2015	12	5	18	11	0	15.1681	-34.4999	2.27
2015	12	5	18	12	0	15.1635	-34.5	1.87
2015	12	5	18	13	0	15.159	-34.5	1.54
2015	12	5	18	14	0	15.1543	-34.4999	1.27
2015	12	5	18	15	0	15.1498	-34.4999	1.04
2015	12	5	18	16	0	15.1451	-34.4999	0.86
2015	12	5	18	17	0	15.1405	-34.4999	0.71
2015	12	5	18	18	0	15.136	-34.4999	0.59
2015	12	5	18	19	0	15.1313	-34.4999	0.48
2015	12	5	18	20	0	15.1268	-34.4999	0.4
2015	12	5	18	21	0	15.1221	-34.4999	0.33
2015	12	5	18	22	0	15.1176	-34.5	0.27
2015	12	5	18	23	0	15.1131	-34.4999	0.22
2015	12	5	18	24	0	15.1085	-34.4999	0.19
2015	12	5	18	25	0	15.1039	-34.4999	0.16
2015	12	5	18	26	0	15.0994	-34.4999	0.13
2015	12	5	18	27	0	15.0949	-34.4999	0.11
2015	12	5	18	28	0	15.0904	-34.4999	0.08
2015	12	5	18	29	0	15.0857	-34.4999	0.07
2015	12	5	18	30	0	15.0812	-34.4999	0.05
2015	12	5	18	31	0	15.0767	-34.5	0.04
2015	12	5	18	32	0	15.0722	-34.5	0.03
2015	12	5	18	33	0	15.0677	-34.4999	0.03
2015	12	5	18	34	0	15.0632	-34.4999	0.02
2015	12	5	18	35	0	15.0586	-34.4999	0.02
2015	12	5	18	36	0	15.0541	-34.4999	0.02
2015	12	5	18	37	0	15.0495	-34.4999	0.01
2015	12	5	18	38	0	15.0449	-34.4999	0.01
2015	12	5	18	39	0	15.0404	-34.4999	0.01
2015	12	5	18	40	0	15.0358	-34.5	0.01
2015	12	5	18	41	0	15.0312	-34.4999	0.01
2015	12	5	18	42	0	15.0266	-34.4999	NaN
2015	12	5	18	43	0	15.0221	-34.5	NaN
2015	12	5	18	44	0	15.0176	-34.5	NaN
2015	12	5	18	45	0	15.013	-34.5	NaN
2015	12	5	18	46	0	15.0086	-34.5	NaN
2015	12	5	18	47	0	15.0041	-34.4999	NaN
2015	12	5	18	48	0	14.9997	-34.4999	NaN
2015	12	5	18	49	0	14.9952	-34.4999	NaN
2015	12	5	18	50	0	14.9907	-34.4999	NaN
2015	12	5	18	51	0	14.9862	-34.4999	NaN
2015	12	5	18	52	0	14.9817	-34.4999	NaN
2015	12	5	18	53	0	14.9771	-34.4999	NaN
2015	12	5	18	54	0	14.9727	-34.4998	NaN
2015	12	5	18	55	0	14.9682	-34.4998	NaN
2015	12	5	18	56	0	14.9637	-34.4998	NaN
2015	12	5	18	57	0	14.9593	-34.4998	NaN
2015	12	5	18	58	0	14.9548	-34.4998	NaN
2015	12	5	18	59	0	14.9503	-34.4998	NaN
2015	12	5	19	0	0	14.9458	-34.4998	NaN
2015	12	5	19	1	0	14.9414	-34.4998	NaN
2015	12	5	19	2	0	14.9369	-34.4998	NaN
2015	12	5	19	3	0	14.9325	-34.4998	NaN
2015	12	5	19	4	0	14.9279	-34.4998	NaN
2015	12	5	19	5	0	14.9236	-34.4998	NaN
2015	12	5	19	6	0	14.9191	-34.4998	NaN
2015	12	5	19	7	0	14.9145	-34.4998	NaN
2015	12	5	19	8	0	14.9101	-34.4999	NaN
2015	12	5	19	9	0	14.9056	-34.4998	NaN
2015	12	5	19	10	0	14.9011	-34.4998	NaN
2015	12	5	19	11	0	14.8965	-34.4998	NaN
2015	12	5	19	12	0	14.892	-34.4998	NaN
2015	12	5	19	13	0	14.8874	-34.4998	NaN
2015	12	5	19	14	0	14.8828	-34.4998	NaN
2015	12	5	19	15	0	14.8784	-34.4999	NaN
2015	12	5	19	16	0	14.8739	-34.4999	NaN
2015	12	5	19	17	0	14.8692	-34.4999	NaN
2015	12	5	19	18	0	14.8647	-34.4999	NaN
2015	12	5	19	19	0	14.8602	-34.4999	NaN
2015	12	5	19	20	0	14.8556	-34.4999	NaN
2015	12	5	19	21	0	14.8511	-34.4999	NaN
2015	12	5	19	22	0	14.8466	-34.4999	NaN
2015	12	5	19	23	0	14.8421	-34.4999	NaN
2015	12	5	19	24	0	14.8376	-34.4999	NaN
2015	12	5	19	25	0	14.833	-34.4999	NaN
2015	12	5	19	26	0	14.8285	-34.4999	NaN
2015	12	5	19	27	0	14.8239	-34.4999	NaN
2015	12	5	19	28	0	14.8195	-34.4999	NaN
2015	12	5	19	29	0	14.8149	-34.5	NaN
2015	12	5	19	30	0	14.8104	-34.4999	NaN
2015	12	5	19	31	0	14.8058	-34.4999	NaN
2015	12	5	19	32	0	14.8013	-34.4999	NaN
2015	12	5	19	33	0	14.7967	-34.4999	NaN
2015	12	5	19	34	0	14.7921	-34.4999	NaN
2015	12	5	19	35	0	14.7876	-34.4999	NaN
2015	12	5	19	36	0	14.783	-34.4999	NaN
2015	12	5	19	37	0	14.7784	-34.4999	NaN
2015	12	5	19	38	0	14.7739	-34.4999	NaN
2015	12	5	19	39	0	14.7693	-34.4999	NaN
2015	12	5	19	40	0	14.7647	-34.4999	NaN
2015	12	5	19	41	0	14.76	-34.4999	NaN
2015	12	5	19	42	0	14.7555	-34.4999	NaN
2015	12	5	19	43	0	14.7509	-34.4999	NaN
2015	12	5	19	44	0	14.7463	-34.4999	NaN
2015	12	5	19	45	0	14.7419	-34.4999	NaN
2015	12	5	19	46	0	14.7375	-34.4998	NaN
2015	12	5	19	47	0	14.7331	-34.4998	NaN
2015	12	5	19	48	0	14.7286	-34.4997	NaN
2015	12	5	19	49	0	14.7243	-34.4995	NaN
2015	12	5	19	50	0	14.72	-34.4991	NaN
2015	12	5	19	51	0	14.7159	-34.4987	NaN
2015	12	5	19	52	0	14.7119	-34.4986	NaN
2015	12	5	19	53	0	14.7078	-34.4984	NaN
2015	12	5	19	54	0	14.7035	-34.4982	NaN
2015	12	5	19	55	0	14.699	-34.4977	NaN
2015	12	5	19	56	0	14.6948	-34.4972	NaN
2015	12	5	19	57	0	14.6905	-34.497	NaN
2015	12	5	19	58	0	14.6865	-34.4967	NaN
2015	12	5	19	59	0	14.6828	-34.4963	NaN
2015	12	5	20	0	0	14.6796	-34.4961	NaN
2015	12	5	20	1	0	14.6771	-34.4961	NaN
2015	12	5	20	2	0	14.675	-34.4965	NaN
2015	12	5	20	3	0	14.6729	-34.4969	NaN
2015	12	5	20	4	0	14.6704	-34.4968	NaN
2015	12	5	20	5	0	14.6678	-34.4965	NaN
2015	12	5	20	6	0	14.665	-34.4964	NaN
2015	12	5	20	7	0	14.662	-34.4965	NaN
2015	12	5	20	8	0	14.659	-34.4966	NaN
2015	12	5	20	9	0	14.6558	-34.4961	NaN
2015	12	5	20	10	0	14.6531	-34.4959	NaN
2015	12	5	20	11	0	14.6512	-34.4958	NaN
2015	12	5	20	12	0	14.6484	-34.4958	NaN
2015	12	5	20	13	0	14.6466	-34.4963	NaN
2015	12	5	20	14	0	14.645	-34.4967	NaN
2015	12	5	20	15	0	14.6434	-34.4967	NaN
2015	12	5	20	16	0	14.642	-34.4963	NaN
2015	12	5	20	17	0	14.6409	-34.4961	NaN
2015	12	5	20	18	0	14.6401	-34.496	NaN
2015	12	5	20	19	0	14.6395	-34.4959	NaN
2015	12	5	20	20	0	14.6392	-34.4958	NaN
2015	12	5	20	21	0	14.639	-34.4956	NaN
2015	12	5	20	22	0	14.6388	-34.4954	NaN
2015	12	5	20	23	0	14.6389	-34.4952	NaN
2015	12	5	20	24	0	14.639	-34.4951	NaN
2015	12	5	20	25	0	14.6392	-34.4952	NaN
2015	12	5	20	26	0	14.6397	-34.4957	NaN
2015	12	5	20	27	0	14.6401	-34.4963	NaN
2015	12	5	20	28	0	14.6401	-34.497	NaN
2015	12	5	20	29	0	14.6399	-34.4976	NaN
2015	12	5	20	30	0	14.6396	-34.4982	NaN
2015	12	5	20	31	0	14.6394	-34.4985	NaN
2015	12	5	20	32	0	14.6392	-34.4986	NaN
2015	12	5	20	33	0	14.639	-34.4987	NaN
2015	12	5	20	34	0	14.6388	-34.499	NaN
2015	12	5	20	35	0	14.6385	-34.4995	NaN
2015	12	5	20	36	0	14.6383	-34.4998	NaN
2015	12	5	20	37	0	14.6382	-34.4997	NaN
2015	12	5	20	38	0	14.6382	-34.4997	NaN
2015	12	5	20	39	0	14.6384	-34.4998	NaN
2015	12	5	20	40	0	14.6386	-34.4998	NaN
2015	12	5	20	41	0	14.6387	-34.4998	NaN
2015	12	5	20	42	0	14.6389	-34.4999	NaN
2015	12	5	20	43	0	14.6391	-34.4999	NaN
2015	12	5	20	44	0	14.6392	-34.4999	NaN
2015	12	5	20	45	0	14.6392	-34.4999	NaN
2015	12	5	20	46	0	14.6392	-34.4999	NaN
2015	12	5	20	47	0	14.6392	-34.4999	NaN
2015	12	5	20	48	0	14.6392	-34.4999	NaN
2015	12	5	20	49	0	14.6392	-34.4999	NaN
2015	12	5	20	50	0	14.6391	-34.4999	NaN
2015	12	5	20	51	0	14.6392	-34.4999	NaN
2015	12	5	20	52	0	14.6392	-34.4999	NaN
2015	12	5	20	53	0	14.6392	-34.4999	NaN
2015	12	5	20	54	0	14.6392	-34.4999	NaN
2015	12	5	20	55	0	14.6392	-34.4999	NaN
2015	12	5	20	56	0	14.6392	-34.4999	NaN
2015	12	5	20	57	0	14.6391	-34.4999	NaN
2015	12	5	20	58	0	14.6392	-34.4999	NaN
2015	12	5	20	59	0	14.6392	-34.4999	NaN
2015	12	5	21	0	0	14.6392	-34.4999	NaN
2015	12	5	21	1	0	14.6391	-34.4999	NaN
2015	12	5	21	2	0	14.6392	-34.4999	NaN
2015	12	5	21	3	0	14.6392	-34.4999	NaN
2015	12	5	21	4	0	14.6392	-34.4999	NaN
2015	12	5	21	5	0	14.6392	-34.4999	NaN
2015	12	5	21	6	0	14.6392	-34.4999	NaN
2015	12	5	21	7	0	14.6392	-34.4999	NaN
2015	12	5	21	8	0	14.6391	-34.4999	NaN
2015	12	5	21	9	0	14.6392	-34.4999	NaN
2015	12	5	21	10	0	14.6392	-34.4999	NaN
2015	12	5	21	11	0	14.6392	-34.4999	NaN
2015	12	5	21	12	0	14.6392	-34.4999	NaN
2015	12	5	21	13	0	14.6392	-34.4999	NaN
2015	12	5	21	14	0	14.6392	-34.4999	NaN
2015	12	5	21	15	0	14.6392	-34.4999	NaN
2015	12	5	21	16	0	14.6392	-34.4999	NaN
2015	12	5	21	17	0	14.6392	-34.4999	NaN
2015	12	5	21	18	0	14.6392	-34.4999	NaN
2015	12	5	21	19	0	14.6392	-34.4999	NaN
2015	12	5	21	20	0	14.6392	-34.4999	NaN
2015	12	5	21	21	0	14.6392	-34.4999	NaN
2015	12	5	21	22	0	14.6392	-34.4999	NaN
2015	12	5	21	23	0	14.6392	-34.4999	NaN
2015	12	5	21	24	0	14.6392	-34.4999	NaN
2015	12	5	21	25	0	14.6392	-34.4999	NaN
2015	12	5	21	26	0	14.6392	-34.4999	NaN
2015	12	5	21	27	0	14.6392	-34.4999	NaN
2015	12	5	21	28	0	14.6392	-34.4999	NaN
2015	12	5	21	29	0	14.6392	-34.4999	NaN
2015	12	5	21	30	0	14.6392	-34.4999	NaN
2015	12	5	21	31	0	14.6392	-34.4999	NaN
2015	12	5	21	32	0	14.6392	-34.4999	NaN
2015	12	5	21	33	0	14.6392	-34.4999	NaN
2015	12	5	21	34	0	14.6392	-34.4999	NaN
2015	12	5	21	35	0	14.6392	-34.4999	NaN
2015	12	5	21	36	0	14.6392	-34.4999	NaN
2015	12	5	21	37	0	14.6392	-34.4999	NaN
2015	12	5	21	38	0	14.6392	-34.4999	NaN
2015	12	5	21	39	0	14.6392	-34.4999	NaN
2015	12	5	21	40	0	14.6392	-34.4999	NaN
2015	12	5	21	41	0	14.6392	-34.4999	NaN
2015	12	5	21	42	0	14.6392	-34.4999	NaN
2015	12	5	21	43	0	14.6392	-34.4999	NaN
2015	12	5	21	44	0	14.6392	-34.4999	NaN
2015	12	5	21	45	0	14.6392	-34.4999	NaN
2015	12	5	21	46	0	14.6392	-34.4999	NaN
2015	12	5	21	47	0	14.6392	-34.4999	NaN
2015	12	5	21	48	0	14.6392	-34.4999	NaN
2015	12	5	21	49	0	14.6392	-34.4999	NaN
2015	12	5	21	50	0	14.6392	-34.4999	NaN
2015	12	5	21	51	0	14.6392	-34.4999	NaN
2015	12	5	21	52	0	14.6392	-34.4999	NaN
2015	12	5	21	53	0	14.6392	-34.5	NaN
2015	12	5	21	54	0	14.6392	-34.5	NaN
2015	12	5	21	55	0	14.6392	-34.4999	NaN
2015	12	5	21	56	0	14.6392	-34.4999	NaN
2015	12	5	21	57	0	14.6392	-34.4999	NaN
2015	12	5	21	58	0	14.6392	-34.4999	NaN
2015	12	5	21	59	0	14.6391	-34.4999	NaN
2015	12	5	22	0	0	14.6392	-34.4999	NaN
2015	12	5	22	1	0	14.6392	-34.4999	NaN
2015	12	5	22	2	0	14.6392	-34.4999	NaN
2015	12	5	22	3	0	14.6392	-34.4999	NaN
2015	12	5	22	4	0	14.6392	-34.4999	NaN
2015	12	5	22	5	0	14.6392	-34.4999	NaN
2015	12	5	22	6	0	14.6392	-34.4999	NaN
2015	12	5	22	7	0	14.6392	-34.4999	NaN
2015	12	5	22	8	0	14.6392	-34.4999	NaN
2015	12	5	22	9	0	14.6392	-34.4999	NaN
2015	12	5	22	10	0	14.6392	-34.4999	NaN
2015	12	5	22	11	0	14.6392	-34.4999	NaN
2015	12	5	22	12	0	14.6392	-34.5	NaN
2015	12	5	22	13	0	14.6392	-34.4999	NaN
2015	12	5	22	14	0	14.6392	-34.4999	NaN
2015	12	5	22	15	0	14.6392	-34.4999	NaN
2015	12	5	22	16	0	14.6392	-34.4999	NaN
2015	12	5	22	17	0	14.6392	-34.4999	NaN
2015	12	5	22	18	0	14.6392	-34.4999	NaN
2015	12	5	22	19	0	14.6392	-34.4999	NaN
2015	12	5	22	20	0	14.6392	-34.4999	NaN
2015	12	5	22	21	0	14.6392	-34.4999	NaN
2015	12	5	22	22	0	14.6392	-34.4999	NaN
2015	12	5	22	23	0	14.6392	-34.4999	NaN
2015	12	5	22	24	0	14.6392	-34.4999	NaN
2015	12	5	22	25	0	14.6392	-34.4999	NaN
2015	12	5	22	26	0	14.6392	-34.4999	NaN
2015	12	5	22	27	0	14.6392	-34.4999	NaN
2015	12	5	22	28	0	14.6392	-34.4999	NaN
2015	12	5	22	29	0	14.6392	-34.4999	NaN
2015	12	5	22	30	0	14.6392	-34.4999	NaN
2015	12	5	22	31	0	14.6392	-34.4999	NaN
2015	12	5	22	32	0	14.6392	-34.4999	NaN
2015	12	5	22	33	0	14.6392	-34.4999	NaN
2015	12	5	22	34	0	14.6392	-34.4999	NaN
2015	12	5	22	35	0	14.6392	-34.4999	NaN
2015	12	5	22	36	0	14.6392	-34.4999	NaN
2015	12	5	22	37	0	14.6392	-34.4999	NaN
2015	12	5	22	38	0	14.6392	-34.4999	NaN
2015	12	5	22	39	0	14.6392	-34.4999	NaN
2015	12	5	22	40	0	14.6392	-34.4999	NaN
2015	12	5	22	41	0	14.6392	-34.4999	NaN
2015	12	5	22	42	0	14.6392	-34.4999	NaN
2015	12	5	22	43	0	14.6392	-34.4999	NaN
2015	12	5	22	44	0	14.6392	-34.4999	NaN
2015	12	5	22	45	0	14.6392	-34.4999	NaN
2015	12	5	22	46	0	14.6392	-34.4999	NaN
2015	12	5	22	47	0	14.6392	-34.4999	NaN
2015	12	5	22	48	0	14.6392	-34.4999	NaN
2015	12	5	22	49	0	14.6392	-34.4999	NaN
2015	12	5	22	50	0	14.6392	-34.4999	NaN
2015	12	5	22	51	0	14.6392	-34.4999	NaN
2015	12	5	22	52	0	14.6392	-34.4999	NaN
2015	12	5	22	53	0	14.6392	-34.4999	NaN
2015	12	5	22	54	0	14.6392	-34.4999	NaN
2015	12	5	22	55	0	14.6392	-34.4999	NaN
2015	12	5	22	56	0	14.6392	-34.4999	NaN
2015	12	5	22	57	0	14.6392	-34.4999	NaN
2015	12	5	22	58	0	14.6392	-34.4999	NaN
2015	12	5	22	59	0	14.6392	-34.4999	NaN
2015	12	5	23	0	0	14.6392	-34.4999	NaN
2015	12	5	23	1	0	14.6392	-34.4999	NaN
2015	12	5	23	2	0	14.6392	-34.4999	NaN
2015	12	5	23	3	0	14.6392	-34.4999	NaN
2015	12	5	23	4	0	14.6392	-34.4999	NaN
2015	12	5	23	5	0	14.6392	-34.4999	NaN
2015	12	5	23	6	0	14.6392	-34.4999	NaN
2015	12	5	23	7	0	14.6392	-34.4999	NaN
2015	12	5	23	8	0	14.6391	-34.4999	NaN
2015	12	5	23	9	0	14.6392	-34.5	NaN
2015	12	5	23	10	0	14.6392	-34.5	NaN
2015	12	5	23	11	0	14.6392	-34.4999	NaN
2015	12	5	23	12	0	14.6392	-34.4999	NaN
2015	12	5	23	13	0	14.6391	-34.5	NaN
2015	12	5	23	14	0	14.6392	-34.5	NaN
2015	12	5	23	15	0	14.6392	-34.5	NaN
2015	12	5	23	16	0	14.6392	-34.5	NaN
2015	12	5	23	17	0	14.6392	-34.5	NaN
2015	12	5	23	18	0	14.6392	-34.5	NaN
2015	12	5	23	19	0	14.6392	-34.4999	NaN
2015	12	5	23	20	0	14.6392	-34.4999	NaN
2015	12	5	23	21	0	14.6392	-34.4999	NaN
2015	12	5	23	22	0	14.6392	-34.4999	NaN
2015	12	5	23	23	0	14.6391	-34.4999	NaN
2015	12	5	23	24	0	14.6392	-34.4999	NaN
2015	12	5	23	25	0	14.6392	-34.4999	NaN
2015	12	5	23	26	0	14.6392	-34.4999	NaN
2015	12	5	23	27	0	14.6391	-34.4999	NaN
2015	12	5	23	28	0	14.6392	-34.4999	NaN
2015	12	5	23	29	0	14.6392	-34.4999	NaN
2015	12	5	23	30	0	14.6392	-34.4999	NaN
2015	12	5	23	31	0	14.6392	-34.4999	NaN
2015	12	5	23	32	0	14.6392	-34.4999	NaN
2015	12	5	23	33	0	14.6392	-34.4999	NaN
2015	12	5	23	34	0	14.6392	-34.4999	NaN
2015	12	5	23	35	0	14.6392	-34.4999	NaN
2015	12	5	23	36	0	14.6392	-34.4999	NaN
2015	12	5	23	37	0	14.6392	-34.4999	NaN
2015	12	5	23	38	0	14.6392	-34.4999	NaN
2015	12	5	23	39	0	14.6392	-34.4999	NaN
2015	12	5	23	40	0	14.6392	-34.4999	NaN
2015	12	5	23	41	0	14.6392	-34.4999	NaN
2015	12	5	23	42	0	14.6392	-34.4999	NaN
2015	12	5	23	43	0	14.6392	-34.4999	NaN
2015	12	5	23	44	0	14.6392	-34.4999	NaN
2015	12	5	23	45	0	14.6392	-34.4999	NaN
2015	12	5	23	46	0	14.6392	-34.4999	NaN
2015	12	5	23	47	0	14.6391	-34.4999	NaN
2015	12	5	23	48	0	14.6392	-34.4999	NaN
2015	12	5	23	49	0	14.6392	-34.4999	NaN
2015	12	5	23	50	0	14.6392	-34.4999	NaN
2015	12	5	23	51	0	14.6392	-34.4999	NaN
2015	12	5	23	52	0	14.6391	-34.4999	NaN
2015	12	5	23	53	0	14.6392	-34.4999	NaN
2015	12	5	23	54	0	14.6391	-34.4999	NaN
2015	12	5	23	55	0	14.6391	-34.4999	NaN
2015	12	5	23	56	0	14.6391	-34.4999	NaN
2015	12	5	23	57	0	14.6392	-34.4999	NaN
2015	12	5	23	58	0	14.6392	-34.4999	NaN
2015	12	5	23	59	0	14.6392	-34.4999	NaN
2015	12	6	0	0	0	14.6391	-34.4999	NaN
2015	12	6	0	1	0	14.6391	-34.4999	NaN
2015	12	6	0	2	0	14.6391	-34.4999	NaN
2015	12	6	0	3	0	14.6392	-34.4999	NaN
2015	12	6	0	4	0	14.6391	-34.4999	NaN
2015	12	6	0	5	0	14.6392	-34.4999	NaN
2015	12	6	0	6	0	14.6391	-34.4999	NaN
2015	12	6	0	7	0	14.6391	-34.4999	NaN
2015	12	6	0	8	0	14.6392	-34.4999	NaN
2015	12	6	0	9	0	14.6391	-34.4999	NaN
2015	12	6	0	10	0	14.6392	-34.4999	NaN
2015	12	6	0	11	0	14.6391	-34.4999	NaN
2015	12	6	0	12	0	14.6392	-34.4999	NaN
2015	12	6	0	13	0	14.6391	-34.4999	NaN
2015	12	6	0	14	0	14.6391	-34.4999	NaN
2015	12	6	0	15	0	14.6392	-34.4999	NaN
2015	12	6	0	16	0	14.6391	-34.4999	NaN
2015	12	6	0	17	0	14.6392	-34.4999	NaN
2015	12	6	0	18	0	14.6391	-34.4999	NaN
2015	12	6	0	19	0	14.6392	-34.4999	NaN
2015	12	6	0	20	0	14.6392	-34.4999	NaN
2015	12	6	0	21	0	14.6392	-34.4999	NaN
2015	12	6	0	22	0	14.6392	-34.4999	NaN
2015	12	6	0	23	0	14.6392	-34.4999	NaN
2015	12	6	0	24	0	14.6391	-34.4999	NaN
2015	12	6	0	25	0	14.6392	-34.4999	NaN
2015	12	6	0	26	0	14.6392	-34.4999	NaN
2015	12	6	0	27	0	14.6392	-34.4999	NaN
2015	12	6	0	28	0	14.6392	-34.4999	NaN
2015	12	6	0	29	0	14.6392	-34.4999	NaN
2015	12	6	0	30	0	14.6392	-34.4999	NaN
2015	12	6	0	31	0	14.6391	-34.4999	NaN
2015	12	6	0	32	0	14.6392	-34.4999	NaN
2015	12	6	0	33	0	14.6392	-34.4999	NaN
2015	12	6	0	34	0	14.6392	-34.4999	NaN
2015	12	6	0	35	0	14.6392	-34.4999	NaN
2015	12	6	0	36	0	14.6392	-34.4999	NaN
2015	12	6	0	37	0	14.6392	-34.4999	NaN
2015	12	6	0	38	0	14.6392	-34.4999	NaN
2015	12	6	0	39	0	14.6392	-34.4999	NaN
2015	12	6	0	40	0	14.6392	-34.4999	NaN
2015	12	6	0	41	0	14.6392	-34.4999	NaN
2015	12	6	0	42	0	14.6392	-34.4999	NaN
2015	12	6	0	43	0	14.6392	-34.4999	NaN
2015	12	6	0	44	0	14.639	-34.5	NaN
2015	12	6	0	45	0	14.6387	-34.5002	NaN
2015	12	6	0	46	0	14.6382	-34.5007	NaN
2015	12	6	0	47	0	14.6376	-34.5013	NaN
2015	12	6	0	48	0	14.6371	-34.502	NaN
2015	12	6	0	49	0	14.6366	-34.5033	NaN
2015	12	6	0	50	0	14.6361	-34.5052	NaN
2015	12	6	0	51	0	14.6354	-34.5074	NaN
2015	12	6	0	52	0	14.634	-34.5097	NaN
2015	12	6	0	53	0	14.6319	-34.5121	NaN
2015	12	6	0	54	0	14.63	-34.5144	NaN
2015	12	6	0	55	0	14.6273	-34.5166	NaN
2015	12	6	0	56	0	14.6243	-34.5189	NaN
2015	12	6	0	57	0	14.622	-34.5218	NaN
2015	12	6	0	58	0	14.6199	-34.5248	NaN
2015	12	6	0	59	0	14.6176	-34.5278	NaN
2015	12	6	1	0	0	14.6151	-34.5308	NaN
2015	12	6	1	1	0	14.6128	-34.5339	NaN
2015	12	6	1	2	0	14.6104	-34.5371	NaN
2015	12	6	1	3	0	14.6082	-34.5402	NaN
2015	12	6	1	4	0	14.6058	-34.5433	NaN
2015	12	6	1	5	0	14.6035	-34.5463	NaN
2015	12	6	1	6	0	14.6011	-34.5494	NaN
2015	12	6	1	7	0	14.5987	-34.5524	NaN
2015	12	6	1	8	0	14.5963	-34.5555	NaN
2015	12	6	1	9	0	14.5939	-34.5586	NaN
2015	12	6	1	10	0	14.5917	-34.5617	NaN
2015	12	6	1	11	0	14.5893	-34.5647	NaN
2015	12	6	1	12	0	14.5869	-34.5678	NaN
2015	12	6	1	13	0	14.5845	-34.5709	NaN
2015	12	6	1	14	0	14.5821	-34.574	NaN
2015	12	6	1	15	0	14.5797	-34.5771	NaN
2015	12	6	1	16	0	14.5772	-34.5802	NaN
2015	12	6	1	17	0	14.5748	-34.5833	NaN
2015	12	6	1	18	0	14.5725	-34.5864	NaN
2015	12	6	1	19	0	14.5701	-34.5896	NaN
2015	12	6	1	20	0	14.5678	-34.5926	NaN
2015	12	6	1	21	0	14.5654	-34.5958	NaN
2015	12	6	1	22	0	14.563	-34.5989	NaN
2015	12	6	1	23	0	14.5605	-34.602	NaN
2015	12	6	1	24	0	14.5581	-34.6051	NaN
2015	12	6	1	25	0	14.5556	-34.6083	NaN
2015	12	6	1	26	0	14.5532	-34.6115	NaN
2015	12	6	1	27	0	14.5508	-34.6146	NaN
2015	12	6	1	28	0	14.5484	-34.6177	NaN
2015	12	6	1	29	0	14.5459	-34.6209	NaN
2015	12	6	1	30	0	14.5435	-34.624	NaN
2015	12	6	1	31	0	14.5411	-34.6272	NaN
2015	12	6	1	32	0	14.5386	-34.6304	NaN
2015	12	6	1	33	0	14.5362	-34.6336	NaN
2015	12	6	1	34	0	14.5337	-34.6368	NaN
2015	12	6	1	35	0	14.5313	-34.64	NaN
2015	12	6	1	36	0	14.5289	-34.6431	NaN
2015	12	6	1	37	0	14.5264	-34.6464	NaN
2015	12	6	1	38	0	14.5238	-34.6495	NaN
2015	12	6	1	39	0	14.5214	-34.6526	NaN
2015	12	6	1	40	0	14.519	-34.6558	NaN
2015	12	6	1	41	0	14.5164	-34.6589	NaN
2015	12	6	1	42	0	14.514	-34.6621	NaN
2015	12	6	1	43	0	14.5116	-34.6653	NaN
2015	12	6	1	44	0	14.5092	-34.6684	NaN
2015	12	6	1	45	0	14.5068	-34.6716	NaN
2015	12	6	1	46	0	14.5044	-34.6747	NaN
2015	12	6	1	47	0	14.5018	-34.6779	NaN
2015	12	6	1	48	0	14.4994	-34.6811	NaN
2015	12	6	1	49	0	14.4971	-34.6842	NaN
2015	12	6	1	50	0	14.4946	-34.6874	NaN
2015	12	6	1	51	0	14.4922	-34.6905	NaN
2015	12	6	1	52	0	14.4899	-34.6936	NaN
2015	12	6	1	53	0	14.4874	-34.6967	NaN
2015	12	6	1	54	0	14.485	-34.6998	NaN
2015	12	6	1	55	0	14.4827	-34.703	NaN
2015	12	6	1	56	0	14.4802	-34.7061	NaN
2015	12	6	1	57	0	14.4779	-34.7092	NaN
2015	12	6	1	58	0	14.4755	-34.7123	NaN
2015	12	6	1	59	0	14.4731	-34.7154	NaN
2015	12	6	2	0	0	14.4707	-34.7185	NaN
2015	12	6	2	1	0	14.4683	-34.7215	NaN
2015	12	6	2	2	0	14.4659	-34.7246	NaN
2015	12	6	2	3	0	14.4636	-34.7276	NaN
2015	12	6	2	4	0	14.4611	-34.7308	NaN
2015	12	6	2	5	0	14.4587	-34.7339	NaN
2015	12	6	2	6	0	14.4564	-34.737	NaN
2015	12	6	2	7	0	14.454	-34.7401	NaN
2015	12	6	2	8	0	14.4516	-34.7432	NaN
2015	12	6	2	9	0	14.4492	-34.7463	NaN
2015	12	6	2	10	0	14.4469	-34.7494	NaN
2015	12	6	2	11	0	14.4444	-34.7526	NaN
2015	12	6	2	12	0	14.4421	-34.7557	NaN
2015	12	6	2	13	0	14.4396	-34.7589	NaN
2015	12	6	2	14	0	14.4372	-34.762	NaN
2015	12	6	2	15	0	14.4347	-34.7651	NaN
2015	12	6	2	16	0	14.4324	-34.7682	NaN
2015	12	6	2	17	0	14.4299	-34.7713	NaN
2015	12	6	2	18	0	14.4275	-34.7745	NaN
2015	12	6	2	19	0	14.4251	-34.7777	NaN
2015	12	6	2	20	0	14.4227	-34.7807	NaN
2015	12	6	2	21	0	14.4203	-34.7839	NaN
2015	12	6	2	22	0	14.4177	-34.7871	NaN
2015	12	6	2	23	0	14.4153	-34.7902	NaN
2015	12	6	2	24	0	14.4129	-34.7934	NaN
2015	12	6	2	25	0	14.4106	-34.7965	NaN
2015	12	6	2	26	0	14.4081	-34.7996	NaN
2015	12	6	2	27	0	14.4057	-34.8027	NaN
2015	12	6	2	28	0	14.4034	-34.8058	NaN
2015	12	6	2	29	0	14.401	-34.8089	NaN
2015	12	6	2	30	0	14.3985	-34.812	NaN
2015	12	6	2	31	0	14.3961	-34.8152	NaN
2015	12	6	2	32	0	14.3938	-34.8184	NaN
2015	12	6	2	33	0	14.3914	-34.8215	NaN
2015	12	6	2	34	0	14.3888	-34.8246	NaN
2015	12	6	2	35	0	14.3865	-34.8276	NaN
2015	12	6	2	36	0	14.384	-34.8309	NaN
2015	12	6	2	37	0	14.3816	-34.8339	NaN
2015	12	6	2	38	0	14.3791	-34.8371	NaN
2015	12	6	2	39	0	14.3767	-34.8402	NaN
2015	12	6	2	40	0	14.3744	-34.8434	NaN
2015	12	6	2	41	0	14.372	-34.8464	NaN
2015	12	6	2	42	0	14.3695	-34.8496	NaN
2015	12	6	2	43	0	14.3672	-34.8526	NaN
2015	12	6	2	44	0	14.3647	-34.8559	NaN
2015	12	6	2	45	0	14.3623	-34.8591	NaN
2015	12	6	2	46	0	14.3598	-34.8622	NaN
2015	12	6	2	47	0	14.3574	-34.8653	NaN
2015	12	6	2	48	0	14.355	-34.8685	NaN
2015	12	6	2	49	0	14.3525	-34.8716	NaN
2015	12	6	2	50	0	14.35	-34.8747	NaN
2015	12	6	2	51	0	14.3477	-34.8779	NaN
2015	12	6	2	52	0	14.3452	-34.8811	NaN
2015	12	6	2	53	0	14.3428	-34.8842	NaN
2015	12	6	2	54	0	14.3404	-34.8873	NaN
2015	12	6	2	55	0	14.338	-34.8904	NaN
2015	12	6	2	56	0	14.3355	-34.8936	NaN
2015	12	6	2	57	0	14.3331	-34.8967	NaN
2015	12	6	2	58	0	14.3307	-34.8999	NaN
2015	12	6	2	59	0	14.3283	-34.903	NaN
2015	12	6	3	0	0	14.3258	-34.9062	NaN
2015	12	6	3	1	0	14.3234	-34.9094	NaN
2015	12	6	3	2	0	14.321	-34.9126	NaN
2015	12	6	3	3	0	14.3186	-34.9156	0.01
2015	12	6	3	4	0	14.3161	-34.9188	0.01
2015	12	6	3	5	0	14.3136	-34.922	0.01
2015	12	6	3	6	0	14.3111	-34.9252	0.02
2015	12	6	3	7	0	14.3087	-34.9283	0.02
2015	12	6	3	8	0	14.3063	-34.9314	0.03
2015	12	6	3	9	0	14.3039	-34.9346	0.03
2015	12	6	3	10	0	14.3015	-34.9377	0.04
2015	12	6	3	11	0	14.299	-34.941	0.05
2015	12	6	3	12	0	14.2965	-34.9441	0.06
2015	12	6	3	13	0	14.2941	-34.9473	0.06
2015	12	6	3	14	0	14.2917	-34.9504	0.08
2015	12	6	3	15	0	14.2892	-34.9535	0.09
2015	12	6	3	16	0	14.2867	-34.9567	0.11
2015	12	6	3	17	0	14.2842	-34.9599	0.14
2015	12	6	3	18	0	14.2819	-34.9631	0.17
2015	12	6	3	19	0	14.2795	-34.9662	0.2
2015	12	6	3	20	0	14.2769	-34.9695	0.22
2015	12	6	3	21	0	14.2744	-34.9727	0.27
2015	12	6	3	22	0	14.2721	-34.9758	0.38
2015	12	6	3	23	0	14.2696	-34.979	0.49
2015	12	6	3	24	0	14.2671	-34.9822	0.63
2015	12	6	3	25	0	14.2646	-34.9854	0.76
2015	12	6	3	26	0	14.2621	-34.9885	1
2015	12	6	3	27	0	14.2596	-34.9918	1.29
2015	12	6	3	28	0	14.2571	-34.995	1.56
2015	12	6	3	29	0	14.2546	-34.9983	1.86
2015	12	6	3	30	0	14.2522	-35.0015	2.09
2015	12	6	3	31	0	14.2497	-35.0047	2.35
2015	12	6	3	32	0	14.2472	-35.0078	2.78
2015	12	6	3	33	0	14.2448	-35.0111	3.32
2015	12	6	3	34	0	14.2423	-35.0143	4.2
2015	12	6	3	35	0	14.2397	-35.0175	4.77
2015	12	6	3	36	0	14.2372	-35.0208	5.21
2015	12	6	3	37	0	14.2348	-35.024	5.38
2015	12	6	3	38	0	14.2323	-35.0272	5.45
2015	12	6	3	39	0	14.2297	-35.0303	5.99
2015	12	6	3	40	0	14.2273	-35.0335	6.44
2015	12	6	3	41	0	14.2249	-35.0367	7.07
2015	12	6	3	42	0	14.2224	-35.04	10.27
2015	12	6	3	43	0	14.2199	-35.0431	12.24
2015	12	6	3	44	0	14.2174	-35.0463	14.65
2015	12	6	3	45	0	14.215	-35.0495	16.92
2015	12	6	3	46	0	14.2126	-35.0526	19.55
2015	12	6	3	47	0	14.2101	-35.0559	21
2015	12	6	3	48	0	14.2076	-35.059	24.39
2015	12	6	3	49	0	14.205	-35.0622	25.72
2015	12	6	3	50	0	14.2026	-35.0654	28.88
2015	12	6	3	51	0	14.2001	-35.0687	33.55
2015	12	6	3	52	0	14.1977	-35.0718	36.67
2015	12	6	3	53	0	14.1952	-35.075	39.45
2015	12	6	3	54	0	14.1927	-35.0782	42.06
2015	12	6	3	55	0	14.1903	-35.0814	44.65
2015	12	6	3	56	0	14.1879	-35.0845	48.14
2015	12	6	3	57	0	14.1854	-35.0876	51.26
2015	12	6	3	58	0	14.183	-35.0908	54.57
2015	12	6	3	59	0	14.1806	-35.094	56.66
2015	12	6	4	0	0	14.1781	-35.0972	58.72
2015	12	6	4	1	0	14.1756	-35.1003	62.35
2015	12	6	4	2	0	14.1731	-35.1035	64.81
2015	12	6	4	3	0	14.1707	-35.1067	66.72
2015	12	6	4	4	0	14.1683	-35.1097	73.07
2015	12	6	4	5	0	14.1657	-35.1129	85.34
2015	12	6	4	6	0	14.1632	-35.1161	94.46
2015	12	6	4	7	0	14.1608	-35.1193	100.56
2015	12	6	4	8	0	14.1584	-35.1225	91.26
2015	12	6	4	9	0	14.1558	-35.1257	80.78
2015	12	6	4	10	0	14.1534	-35.1289	68.78
2015	12	6	4	11	0	14.1509	-35.132	67.94
2015	12	6	4	12	0	14.1484	-35.1352	73.66
2015	12	6	4	13	0	14.146	-35.1385	79.8
2015	12	6	4	14	0	14.1436	-35.1416	81.29
2015	12	6	4	15	0	14.1411	-35.1448	87.18
2015	12	6	4	16	0	14.1386	-35.1481	97.46
2015	12	6	4	17	0	14.1362	-35.1512	104.53
2015	12	6	4	18	0	14.1336	-35.1544	113.7
2015	12	6	4	19	0	14.1312	-35.1576	123.29
2015	12	6	4	20	0	14.1288	-35.1608	127.54
2015	12	6	4	21	0	14.1264	-35.1639	130.26
2015	12	6	4	22	0	14.1239	-35.1671	138.56
2015	12	6	4	23	0	14.1214	-35.1703	145.23
2015	12	6	4	24	0	14.1189	-35.1735	153.02
2015	12	6	4	25	0	14.1165	-35.1766	160.08
2015	12	6	4	26	0	14.114	-35.1798	163.46
2015	12	6	4	27	0	14.1114	-35.183	168.68
2015	12	6	4	28	0	14.109	-35.1863	174.36
2015	12	6	4	29	0	14.1065	-35.1895	178.76
2015	12	6	4	30	0	14.104	-35.1927	180.28
2015	12	6	4	31	0	14.1014	-35.1959	180.7
2015	12	6	4	32	0	14.099	-35.1992	180.95
2015	12	6	4	33	0	14.0966	-35.2023	177.69
2015	12	6	4	34	0	14.0941	-35.2055	167.38
2015	12	6	4	35	0	14.0915	-35.2088	184.14
2015	12	6	4	36	0	14.089	-35.2119	180.7
2015	12	6	4	37	0	14.0864	-35.2151	183.58
2015	12	6	4	38	0	14.084	-35.2184	183.43
2015	12	6	4	39	0	14.0815	-35.2216	188.45
2015	12	6	4	40	0	14.079	-35.2248	197.55
2015	12	6	4	41	0	14.0765	-35.228	200.43
2015	12	6	4	42	0	14.074	-35.2313	194.33
2015	12	6	4	43	0	14.0714	-35.2345	192.91
2015	12	6	4	44	0	14.0689	-35.2378	186.99
2015	12	6	4	45	0	14.0665	-35.241	188.81
2015	12	6	4	46	0	14.0639	-35.2443	201.64
2015	12	6	4	47	0	14.0614	-35.2475	204.65
2015	12	6	4	48	0	14.059	-35.2507	202.14
2015	12	6	4	49	0	14.0565	-35.2539	193.87
2015	12	6	4	50	0	14.0539	-35.2572	184.79
2015	12	6	4	51	0	14.0515	-35.2604	181.05
2015	12	6	4	52	0	14.0488	-35.2637	195.8
2015	12	6	4	53	0	14.0463	-35.267	213.38
2015	12	6	4	54	0	14.0438	-35.2701	249.17
2015	12	6	4	55	0	14.0413	-35.2736	321.25
2015	12	6	4	56	0	14.0387	-35.2768	360.46
2015	12	6	4	57	0	14.0361	-35.28	352.79
2015	12	6	4	58	0	14.0336	-35.2833	335.91
2015	12	6	4	59	0	14.031	-35.2867	316.49
2015	12	6	5	0	0	14.0285	-35.29	323.65
2015	12	6	5	1	0	14.026	-35.2933	330.19
2015	12	6	5	2	0	14.0234	-35.2965	355.85
2015	12	6	5	3	0	14.0209	-35.2998	357.79
2015	12	6	5	4	0	14.0183	-35.303	305.77
2015	12	6	5	5	0	14.0157	-35.3063	290.9
2015	12	6	5	6	0	14.0132	-35.3096	219.83
2015	12	6	5	7	0	14.0107	-35.3128	116.02
2015	12	6	5	8	0	14.0081	-35.3162	92.86
2015	12	6	5	9	0	14.0055	-35.3194	85.5
2015	12	6	5	10	0	14.003	-35.3226	105.03
2015	12	6	5	11	0	14.0004	-35.3259	117.34
2015	12	6	5	12	0	13.9979	-35.3291	129.9
2015	12	6	5	13	0	13.9955	-35.3324	180.82
2015	12	6	5	14	0	13.993	-35.3356	244.72
2015	12	6	5	15	0	13.9903	-35.3389	292.07
2015	12	6	5	16	0	13.9878	-35.3421	335.15
2015	12	6	5	17	0	13.9854	-35.3454	371.32
2015	12	6	5	18	0	13.983	-35.3485	391.7
2015	12	6	5	19	0	13.9811	-35.3508	409.87
2015	12	6	5	20	0	13.9796	-35.3527	425.56
2015	12	6	5	21	0	13.9784	-35.3545	432.96
2015	12	6	5	22	0	13.977	-35.3566	410.52
2015	12	6	5	23	0	13.9751	-35.359	384.53
2015	12	6	5	24	0	13.973	-35.3615	374.84
2015	12	6	5	25	0	13.9709	-35.3641	376.57
2015	12	6	5	26	0	13.9688	-35.3667	381.7
2015	12	6	5	27	0	13.9668	-35.3694	388.91
2015	12	6	5	28	0	13.9646	-35.3721	400.09
2015	12	6	5	29	0	13.9625	-35.3748	414.28
2015	12	6	5	30	0	13.9604	-35.3775	433.37
2015	12	6	5	31	0	13.9583	-35.3804	462.16
2015	12	6	5	32	0	13.9561	-35.383	489.49
2015	12	6	5	33	0	13.9539	-35.3857	517.51
2015	12	6	5	34	0	13.9519	-35.3884	537.51
2015	12	6	5	35	0	13.9498	-35.3912	548.92
2015	12	6	5	36	0	13.9477	-35.3939	555.07
2015	12	6	5	37	0	13.9454	-35.3967	561.94
2015	12	6	5	38	0	13.9434	-35.3995	570.88
2015	12	6	5	39	0	13.9413	-35.4022	588.87
2015	12	6	5	40	0	13.9391	-35.4049	588.77
2015	12	6	5	41	0	13.9369	-35.4077	568.67
2015	12	6	5	42	0	13.9347	-35.4104	558.34
2015	12	6	5	43	0	13.9326	-35.4132	555.12
2015	12	6	5	44	0	13.9304	-35.416	550.92
2015	12	6	5	45	0	13.9282	-35.4188	549.22
2015	12	6	5	46	0	13.9261	-35.4216	552.25
2015	12	6	5	47	0	13.924	-35.4244	567.69
2015	12	6	5	48	0	13.9219	-35.4272	588.58
2015	12	6	5	49	0	13.9197	-35.4299	602.97
2015	12	6	5	50	0	13.9176	-35.4327	607.73
2015	12	6	5	51	0	13.9154	-35.4355	609.21
2015	12	6	5	52	0	13.9131	-35.4382	613.7
2015	12	6	5	53	0	13.9109	-35.441	605.6
2015	12	6	5	54	0	13.9087	-35.4438	556.34
2015	12	6	5	55	0	13.9064	-35.4467	523.26
2015	12	6	5	56	0	13.9043	-35.4495	501.47
2015	12	6	5	57	0	13.9021	-35.4522	490.56
2015	12	6	5	58	0	13.8999	-35.455	469.89
2015	12	6	5	59	0	13.8978	-35.4579	468.77
2015	12	6	6	0	0	13.8956	-35.4607	475.38
2015	12	6	6	1	0	13.8935	-35.4633	482.13
2015	12	6	6	2	0	13.8914	-35.4661	485.87
2015	12	6	6	3	0	13.8893	-35.4689	493.65
2015	12	6	6	4	0	13.8872	-35.4716	504.83
2015	12	6	6	5	0	13.885	-35.4743	517.64
2015	12	6	6	6	0	13.8829	-35.477	533.94
2015	12	6	6	7	0	13.8808	-35.4797	553.65
2015	12	6	6	8	0	13.8787	-35.4824	579.41
2015	12	6	6	9	0	13.8766	-35.4851	603.92
2015	12	6	6	10	0	13.8744	-35.4879	622.6
2015	12	6	6	11	0	13.8724	-35.4905	639.72
2015	12	6	6	12	0	13.8702	-35.4933	694.54
2015	12	6	6	13	0	13.868	-35.496	655.48
2015	12	6	6	14	0	13.8659	-35.4987	627.9
2015	12	6	6	15	0	13.8638	-35.5014	630.06
2015	12	6	6	16	0	13.8617	-35.504	641.68
2015	12	6	6	17	0	13.8597	-35.5067	648.46
2015	12	6	6	18	0	13.8576	-35.5094	655.01
2015	12	6	6	19	0	13.8554	-35.5121	652.61
2015	12	6	6	20	0	13.8534	-35.5147	639.33
2015	12	6	6	21	0	13.8514	-35.5174	635.59
2015	12	6	6	22	0	13.8493	-35.5202	637.1
2015	12	6	6	23	0	13.8473	-35.5228	642.7
2015	12	6	6	24	0	13.8453	-35.5255	650.46
2015	12	6	6	25	0	13.8433	-35.5281	662.12
2015	12	6	6	26	0	13.8412	-35.5308	675.1
2015	12	6	6	27	0	13.8391	-35.5335	677.2
2015	12	6	6	28	0	13.8371	-35.5361	670.12
2015	12	6	6	29	0	13.835	-35.5388	656.17
2015	12	6	6	30	0	13.8329	-35.5413	657.54
2015	12	6	6	31	0	13.8308	-35.5439	669.97
2015	12	6	6	32	0	13.8289	-35.5465	726.31
2015	12	6	6	33	0	13.8269	-35.5491	811.09
2015	12	6	6	34	0	13.8248	-35.5518	706.01
2015	12	6	6	35	0	13.8227	-35.5543	687.18
2015	12	6	6	36	0	13.8207	-35.557	681.16
2015	12	6	6	37	0	13.8188	-35.5595	672.68
2015	12	6	6	38	0	13.8167	-35.5622	650.41
2015	12	6	6	39	0	13.8146	-35.5648	620.54
2015	12	6	6	40	0	13.8126	-35.5673	592.59
2015	12	6	6	41	0	13.8105	-35.5699	579.7
2015	12	6	6	42	0	13.8084	-35.5726	553.53
2015	12	6	6	43	0	13.8064	-35.5752	552
2015	12	6	6	44	0	13.8044	-35.5777	560.36
2015	12	6	6	45	0	13.8024	-35.5804	573.28
2015	12	6	6	46	0	13.8005	-35.583	589.79
2015	12	6	6	47	0	13.7984	-35.5856	607.07
2015	12	6	6	48	0	13.7963	-35.5882	626.54
2015	12	6	6	49	0	13.7942	-35.5909	645.98
2015	12	6	6	50	0	13.7923	-35.5934	683.65
2015	12	6	6	51	0	13.7902	-35.5961	669.52
2015	12	6	6	52	0	13.7881	-35.5986	679.46
2015	12	6	6	53	0	13.786	-35.6013	681.49
2015	12	6	6	54	0	13.7841	-35.6039	680.69
2015	12	6	6	55	0	13.782	-35.6066	684.53
2015	12	6	6	56	0	13.78	-35.6092	698.74
2015	12	6	6	57	0	13.7779	-35.612	720.17
2015	12	6	6	58	0	13.7758	-35.6146	743.73
2015	12	6	6	59	0	13.7737	-35.6172	760.76
2015	12	6	7	0	0	13.7717	-35.6199	776.97
2015	12	6	7	1	0	13.7697	-35.6225	779.29
2015	12	6	7	2	0	13.7676	-35.6252	794.05
2015	12	6	7	3	0	13.7656	-35.6277	818.55
2015	12	6	7	4	0	13.7636	-35.6303	855.22
2015	12	6	7	5	0	13.7614	-35.6331	878.89
2015	12	6	7	6	0	13.7593	-35.6358	919.32
2015	12	6	7	7	0	13.7572	-35.6384	998.26
2015	12	6	7	8	0	13.7552	-35.6411	932.9
2015	12	6	7	9	0	13.753	-35.6437	927.52
2015	12	6	7	10	0	13.751	-35.6463	920.45
2015	12	6	7	11	0	13.7489	-35.649	919.84
2015	12	6	7	12	0	13.747	-35.6516	932.64
2015	12	6	7	13	0	13.7448	-35.6542	909.85
2015	12	6	7	14	0	13.7426	-35.6568	889.62
2015	12	6	7	15	0	13.7406	-35.6595	871.71
2015	12	6	7	16	0	13.7386	-35.6621	859.08
2015	12	6	7	17	0	13.7365	-35.6647	853.64
2015	12	6	7	18	0	13.7345	-35.6673	821.31
2015	12	6	7	19	0	13.7325	-35.67	777.43
2015	12	6	7	20	0	13.7305	-35.6726	749.31
2015	12	6	7	21	0	13.7284	-35.6752	715.3
2015	12	6	7	22	0	13.7264	-35.6778	675.64
2015	12	6	7	23	0	13.7244	-35.6803	635.04
2015	12	6	7	24	0	13.7223	-35.6829	603.5
2015	12	6	7	25	0	13.7203	-35.6854	585.67
2015	12	6	7	26	0	13.7185	-35.688	576.3
2015	12	6	7	27	0	13.7165	-35.6906	570.18
2015	12	6	7	28	0	13.7145	-35.6931	568.66
2015	12	6	7	29	0	13.7125	-35.6956	573.69
2015	12	6	7	30	0	13.7106	-35.6982	585.55
2015	12	6	7	31	0	13.7086	-35.7008	600.95
2015	12	6	7	32	0	13.7066	-35.7033	618.24
2015	12	6	7	33	0	13.7045	-35.7058	640.27
2015	12	6	7	34	0	13.7026	-35.7084	664.96
2015	12	6	7	35	0	13.7006	-35.711	686.56
2015	12	6	7	36	0	13.6985	-35.7135	695.32
2015	12	6	7	37	0	13.6965	-35.7161	704.58
2015	12	6	7	38	0	13.6945	-35.7188	716.86
2015	12	6	7	39	0	13.6925	-35.7214	729.6
2015	12	6	7	40	0	13.6904	-35.724	735.09
2015	12	6	7	41	0	13.6884	-35.7266	736.51
2015	12	6	7	42	0	13.6864	-35.7293	728.47
2015	12	6	7	43	0	13.6844	-35.7319	711.5
2015	12	6	7	44	0	13.6822	-35.7345	696.28
2015	12	6	7	45	0	13.6802	-35.7371	686.21
2015	12	6	7	46	0	13.6782	-35.7397	686.81
2015	12	6	7	47	0	13.6762	-35.7423	702.22
2015	12	6	7	48	0	13.674	-35.7449	725.81
2015	12	6	7	49	0	13.672	-35.7475	751.23
2015	12	6	7	50	0	13.6699	-35.7501	769.26
2015	12	6	7	51	0	13.6678	-35.7528	781.61
2015	12	6	7	52	0	13.6658	-35.7554	784.62
2015	12	6	7	53	0	13.6638	-35.7581	774.61
2015	12	6	7	54	0	13.6618	-35.7606	758.51
2015	12	6	7	55	0	13.6597	-35.7632	743.65
2015	12	6	7	56	0	13.6576	-35.7658	738.26
2015	12	6	7	57	0	13.6557	-35.7683	748.06
2015	12	6	7	58	0	13.6536	-35.7709	760.3
2015	12	6	7	59	0	13.6516	-35.7735	762.69
2015	12	6	8	0	0	13.6496	-35.7761	759.32
2015	12	6	8	1	0	13.6476	-35.7787	763.63
2015	12	6	8	2	0	13.6455	-35.7812	777.45
2015	12	6	8	3	0	13.6435	-35.7837	789.92
2015	12	6	8	4	0	13.6415	-35.7863	805.22
2015	12	6	8	5	0	13.6395	-35.7888	824.94
2015	12	6	8	6	0	13.6374	-35.7913	843.3
2015	12	6	8	7	0	13.6354	-35.7938	855.22
2015	12	6	8	8	0	13.6335	-35.7964	856.64
2015	12	6	8	9	0	13.6317	-35.799	857.95
2015	12	6	8	10	0	13.6297	-35.8015	858.12
2015	12	6	8	11	0	13.6278	-35.804	872.82
2015	12	6	8	12	0	13.626	-35.8065	921.68
2015	12	6	8	13	0	13.624	-35.809	936.12
2015	12	6	8	14	0	13.6221	-35.8115	934.81
2015	12	6	8	15	0	13.6202	-35.8139	939.52
2015	12	6	8	16	0	13.6183	-35.8164	959.01
2015	12	6	8	17	0	13.6164	-35.8188	987.09
2015	12	6	8	18	0	13.6144	-35.8213	1003.29
2015	12	6	8	19	0	13.6125	-35.8237	957.14
2015	12	6	8	20	0	13.6106	-35.8261	889.69
2015	12	6	8	21	0	13.6087	-35.8285	892.87
2015	12	6	8	22	0	13.6067	-35.831	917.79
2015	12	6	8	23	0	13.6052	-35.8329	968.13
2015	12	6	8	24	0	13.6034	-35.8351	944.79
2015	12	6	8	25	0	13.6014	-35.8378	927.77
2015	12	6	8	26	0	13.5993	-35.8406	900.44
2015	12	6	8	27	0	13.5971	-35.8434	895.84
2015	12	6	8	28	0	13.5948	-35.8462	900.51
2015	12	6	8	29	0	13.5926	-35.8491	800.87
2015	12	6	8	30	0	13.5903	-35.8521	651.58
2015	12	6	8	31	0	13.5879	-35.8549	578.06
2015	12	6	8	32	0	13.5856	-35.858	601.72
2015	12	6	8	33	0	13.5833	-35.861	595.69
2015	12	6	8	34	0	13.5809	-35.864	578.39
2015	12	6	8	35	0	13.5785	-35.867	659.59
2015	12	6	8	36	0	13.5763	-35.87	632.98
2015	12	6	8	37	0	13.5739	-35.873	680.54
2015	12	6	8	38	0	13.5716	-35.876	640.86
2015	12	6	8	39	0	13.5692	-35.879	684.05
2015	12	6	8	40	0	13.5669	-35.8819	681.14
2015	12	6	8	41	0	13.5646	-35.8849	689.77
2015	12	6	8	42	0	13.5623	-35.8879	716.14
2015	12	6	8	43	0	13.56	-35.8909	661.42
2015	12	6	8	44	0	13.5577	-35.8938	611.98
2015	12	6	8	45	0	13.5554	-35.8967	628.19
2015	12	6	8	46	0	13.553	-35.8997	672.13
2015	12	6	8	47	0	13.5508	-35.9026	676.37
2015	12	6	8	48	0	13.5484	-35.9056	580.72
2015	12	6	8	49	0	13.5461	-35.9086	649.58
2015	12	6	8	50	0	13.5438	-35.9115	713.22
2015	12	6	8	51	0	13.5415	-35.9145	722.2
2015	12	6	8	52	0	13.5392	-35.9173	681.73
2015	12	6	8	53	0	13.5369	-35.9202	674.77
2015	12	6	8	54	0	13.5346	-35.9232	649.33
2015	12	6	8	55	0	13.5322	-35.9262	628.71
2015	12	6	8	56	0	13.5299	-35.9291	619.74
2015	12	6	8	57	0	13.5277	-35.932	590.8
2015	12	6	8	58	0	13.5254	-35.935	537.84
2015	12	6	8	59	0	13.523	-35.9379	519.45
2015	12	6	9	0	0	13.5208	-35.9409	547.15
2015	12	6	9	1	0	13.5185	-35.9439	611.41
2015	12	6	9	2	0	13.5162	-35.9467	636.68
2015	12	6	9	3	0	13.5139	-35.9496	694.91
2015	12	6	9	4	0	13.5116	-35.9526	817.52
2015	12	6	9	5	0	13.5093	-35.9555	945.31
2015	12	6	9	6	0	13.507	-35.9584	1050.54
2015	12	6	9	7	0	13.5047	-35.9613	1116.72
2015	12	6	9	8	0	13.5024	-35.9642	1124.28
2015	12	6	9	9	0	13.5002	-35.9672	1133.98
2015	12	6	9	10	0	13.4979	-35.9701	1129.88
2015	12	6	9	11	0	13.4956	-35.973	1082.49
2015	12	6	9	12	0	13.4933	-35.9759	972.53
2015	12	6	9	13	0	13.4911	-35.9788	937.46
2015	12	6	9	14	0	13.4888	-35.9817	801.78
2015	12	6	9	15	0	13.4865	-35.9846	732.23
2015	12	6	9	16	0	13.4842	-35.9876	653.64
2015	12	6	9	17	0	13.4818	-35.9905	633.98
2015	12	6	9	18	0	13.4795	-35.9935	689.9
2015	12	6	9	19	0	13.4772	-35.9964	745.15
2015	12	6	9	20	0	13.4749	-35.9993	772.56
2015	12	6	9	21	0	13.4726	-36.0023	748.76
2015	12	6	9	22	0	13.4702	-36.0052	734.21
2015	12	6	9	23	0	13.4679	-36.0081	658.25
2015	12	6	9	24	0	13.4656	-36.0111	700.57
2015	12	6	9	25	0	13.4634	-36.0141	720.91
2015	12	6	9	26	0	13.4611	-36.017	703.73
2015	12	6	9	27	0	13.4588	-36.02	748.95
2015	12	6	9	28	0	13.4565	-36.0229	674.6
2015	12	6	9	29	0	13.4542	-36.0258	645.33
2015	12	6	9	30	0	13.4519	-36.0288	678.5
2015	12	6	9	31	0	13.4496	-36.0317	831.39
2015	12	6	9	32	0	13.4473	-36.0347	998.86
2015	12	6	9	33	0	13.4449	-36.0376	904.21
2015	12	6	9	34	0	13.4426	-36.0406	804.07
2015	12	6	9	35	0	13.4403	-36.0435	738.57
2015	12	6	9	36	0	13.438	-36.0465	682.37
2015	12	6	9	37	0	13.4356	-36.0495	738.66
2015	12	6	9	38	0	13.4332	-36.0525	841.61
2015	12	6	9	39	0	13.4308	-36.0555	842.54
2015	12	6	9	40	0	13.4285	-36.0585	736.38
2015	12	6	9	41	0	13.4261	-36.0615	756
2015	12	6	9	42	0	13.4238	-36.0645	858.29
2015	12	6	9	43	0	13.4214	-36.0676	961.25
2015	12	6	9	44	0	13.4192	-36.0705	1015.57
2015	12	6	9	45	0	13.4168	-36.0736	1082.75
2015	12	6	9	46	0	13.4145	-36.0766	1053.97
2015	12	6	9	47	0	13.4121	-36.0795	1035.79
2015	12	6	9	48	0	13.4097	-36.0825	1158.92
2015	12	6	9	49	0	13.4073	-36.0855	1281
2015	12	6	9	50	0	13.405	-36.0885	1191.11
2015	12	6	9	51	0	13.4026	-36.0916	1046.49
2015	12	6	9	52	0	13.4002	-36.0946	1055.06
2015	12	6	9	53	0	13.3979	-36.0976	948.67
2015	12	6	9	54	0	13.3956	-36.1005	884.28
2015	12	6	9	55	0	13.3931	-36.1036	907.36
2015	12	6	9	56	0	13.3908	-36.1066	813.26
2015	12	6	9	57	0	13.3885	-36.1096	793.57
2015	12	6	9	58	0	13.3862	-36.1125	706.45
2015	12	6	9	59	0	13.3838	-36.1154	576.97
2015	12	6	10	0	0	13.3816	-36.1185	554.63
2015	12	6	10	1	0	13.3793	-36.1214	546.44
2015	12	6	10	2	0	13.3769	-36.1244	510.03
2015	12	6	10	3	0	13.3745	-36.1274	504.84
2015	12	6	10	4	0	13.3722	-36.1304	553.81
2015	12	6	10	5	0	13.3699	-36.1333	498.92
2015	12	6	10	6	0	13.3676	-36.1363	535.54
2015	12	6	10	7	0	13.3652	-36.1393	504.42
2015	12	6	10	8	0	13.3628	-36.1424	458.89
2015	12	6	10	9	0	13.3605	-36.1453	448.12
2015	12	6	10	10	0	13.358	-36.1483	510.54
2015	12	6	10	11	0	13.3556	-36.1514	504.7
2015	12	6	10	12	0	13.3533	-36.1544	560.14
2015	12	6	10	13	0	13.351	-36.1574	650.92
2015	12	6	10	14	0	13.3486	-36.1604	640.42
2015	12	6	10	15	0	13.3462	-36.1635	654.45
2015	12	6	10	16	0	13.3439	-36.1665	844.8
2015	12	6	10	17	0	13.3415	-36.1696	1017
2015	12	6	10	18	0	13.3392	-36.1726	1024.19
2015	12	6	10	19	0	13.3367	-36.1756	1246.52
2015	12	6	10	20	0	13.3344	-36.1787	1324.27
2015	12	6	10	21	0	13.3319	-36.1817	1350.8
2015	12	6	10	22	0	13.3294	-36.1847	1339.88
2015	12	6	10	23	0	13.3271	-36.1878	1425.01
2015	12	6	10	24	0	13.3248	-36.1908	1517.09
2015	12	6	10	25	0	13.3223	-36.1938	1653.3
2015	12	6	10	26	0	13.3199	-36.1968	1904.99
2015	12	6	10	27	0	13.3176	-36.1999	1883.84
2015	12	6	10	28	0	13.3155	-36.2031	1705.69
2015	12	6	10	29	0	13.3133	-36.2062	1579.95
2015	12	6	10	30	0	13.3104	-36.209	1445.51
2015	12	6	10	31	0	13.3079	-36.2118	1378.86
2015	12	6	10	32	0	13.3056	-36.215	1358.2
2015	12	6	10	33	0	13.3032	-36.218	1333.02
2015	12	6	10	34	0	13.3008	-36.221	1264.95
2015	12	6	10	35	0	13.2988	-36.2242	1313.29
2015	12	6	10	36	0	13.2968	-36.2275	1372.28
2015	12	6	10	37	0	13.2947	-36.2307	1446.59
2015	12	6	10	38	0	13.2926	-36.234	1500.64
2015	12	6	10	39	0	13.2905	-36.2372	1615.36
2015	12	6	10	40	0	13.2885	-36.2403	1522.2
2015	12	6	10	41	0	13.2864	-36.2436	1419.26
2015	12	6	10	42	0	13.2843	-36.2467	1405.16
2015	12	6	10	43	0	13.2822	-36.2499	1474.86
2015	12	6	10	44	0	13.2801	-36.2531	1395.68
2015	12	6	10	45	0	13.278	-36.2564	1341.57
2015	12	6	10	46	0	13.2759	-36.2595	1307.19
2015	12	6	10	47	0	13.2738	-36.2627	1294.22
2015	12	6	10	48	0	13.2717	-36.2659	1285.16
2015	12	6	10	49	0	13.2695	-36.2691	1265.42
2015	12	6	10	50	0	13.2674	-36.2724	1190.87
2015	12	6	10	51	0	13.2653	-36.2757	1116.59
2015	12	6	10	52	0	13.2632	-36.2788	1043.99
2015	12	6	10	53	0	13.2611	-36.2821	1002.33
2015	12	6	10	54	0	13.259	-36.2853	974.42
2015	12	6	10	55	0	13.2569	-36.2885	970.62
2015	12	6	10	56	0	13.2548	-36.2918	984
2015	12	6	10	57	0	13.2526	-36.295	1015.31
2015	12	6	10	58	0	13.2506	-36.2982	1062.2
2015	12	6	10	59	0	13.2485	-36.3015	1105.53
2015	12	6	11	0	0	13.2463	-36.3046	1141.78
2015	12	6	11	1	0	13.2442	-36.3079	1176.16
2015	12	6	11	2	0	13.2422	-36.3111	1205.44
2015	12	6	11	3	0	13.2401	-36.3143	1142.24
2015	12	6	11	4	0	13.2379	-36.3176	1111.21
2015	12	6	11	5	0	13.2357	-36.3208	1088.8
2015	12	6	11	6	0	13.2336	-36.324	1063.99
2015	12	6	11	7	0	13.2315	-36.3273	1063.17
2015	12	6	11	8	0	13.2294	-36.3305	1049.22
2015	12	6	11	9	0	13.2271	-36.3338	1016.2
2015	12	6	11	10	0	13.225	-36.337	1018.79
2015	12	6	11	11	0	13.2228	-36.3404	1042.32
2015	12	6	11	12	0	13.2207	-36.3437	1053.67
2015	12	6	11	13	0	13.2186	-36.3469	1097.82
2015	12	6	11	14	0	13.2164	-36.3502	1216.09
2015	12	6	11	15	0	13.2143	-36.3534	1347.87
2015	12	6	11	16	0	13.2121	-36.3567	1308.06
2015	12	6	11	17	0	13.2101	-36.3599	1399.12
2015	12	6	11	18	0	13.208	-36.3631	1471.65
2015	12	6	11	19	0	13.2058	-36.3663	1521.44
2015	12	6	11	20	0	13.2037	-36.3696	1632.75
2015	12	6	11	21	0	13.2017	-36.3728	1917.3
2015	12	6	11	22	0	13.1996	-36.3761	1835.35
2015	12	6	11	23	0	13.1974	-36.3793	1611.69
2015	12	6	11	24	0	13.1953	-36.3826	1738.47
2015	12	6	11	25	0	13.1932	-36.3858	1721.69
2015	12	6	11	26	0	13.1911	-36.389	1722.13
2015	12	6	11	27	0	13.189	-36.3922	1832.58
2015	12	6	11	28	0	13.1868	-36.3954	1834.65
2015	12	6	11	29	0	13.1846	-36.3986	1827.9
2015	12	6	11	30	0	13.1826	-36.4018	1686.1
2015	12	6	11	31	0	13.1806	-36.405	1701.44
2015	12	6	11	32	0	13.1784	-36.4082	1953.33
2015	12	6	11	33	0	13.1763	-36.4114	1956.46
2015	12	6	11	34	0	13.1742	-36.4147	2301.12
2015	12	6	11	35	0	13.1721	-36.4179	2092.36
2015	12	6	11	36	0	13.17	-36.4211	1532.44
2015	12	6	11	37	0	13.168	-36.4242	1439.11
2015	12	6	11	38	0	13.1659	-36.4275	1346.26
2015	12	6	11	39	0	13.1637	-36.4306	1367.62
2015	12	6	11	40	0	13.1616	-36.4338	1423.21
2015	12	6	11	41	0	13.1596	-36.437	1440.02
2015	12	6	11	42	0	13.1575	-36.4402	1472.32
2015	12	6	11	43	0	13.1554	-36.4433	1666.92
2015	12	6	11	44	0	13.1533	-36.4466	1465.04
2015	12	6	11	45	0	13.1512	-36.4497	1429.36
2015	12	6	11	46	0	13.1491	-36.4529	1627.33
2015	12	6	11	47	0	13.147	-36.4562	1639.51
2015	12	6	11	48	0	13.1449	-36.4594	1628.61
2015	12	6	11	49	0	13.1427	-36.4626	1430.14
2015	12	6	11	50	0	13.1407	-36.4658	1557.23
2015	12	6	11	51	0	13.1387	-36.469	1396.36
2015	12	6	11	52	0	13.1365	-36.4722	1314.91
2015	12	6	11	53	0	13.1344	-36.4753	1451.21
2015	12	6	11	54	0	13.1323	-36.4785	1669.18
2015	12	6	11	55	0	13.1302	-36.4817	1728.93
2015	12	6	11	56	0	13.1281	-36.4848	1557.25
2015	12	6	11	57	0	13.126	-36.488	1868.43
2015	12	6	11	58	0	13.124	-36.4911	1665.25
2015	12	6	11	59	0	13.122	-36.4942	1551.65
2015	12	6	12	0	0	13.1199	-36.4973	1905.7
2015	12	6	12	1	0	13.1177	-36.5005	2611.97
2015	12	6	12	2	0	13.1157	-36.5037	1852.53
[truncated: 36,638 more rows]
